# Supplementary material for: Effects of metronidazole on the fecal microbiome and metabolome in healthy dogs
Source: PubMed Central journal article supplement (PMC7517498; doi:10.1111/jvim.15871), 2020-08-28
Supplement: JVIM-34-1853-s001.pdf [file JVIM-34-1853-s001.pdf]

**PHYLUM**

| Bacterial group | Day 0  |             | Day 7  |             | Day 21 |             | Day 42 |             | Day 0 vs Day 7 vs Day 21 vs Day 42 |          |
|-----------------|--------|-------------|--------|-------------|--------|-------------|--------|-------------|------------------------------------|----------|
|                 | Median | Range       | Median | Range       | Median | Range       | Median | Range       | P value                            | Q value  |
| Actinobacteria  | 1.06   | 0.19-2.89   | 1.18   | 0.8-1.62    | 1.33   | 0.1-3.49    | 1.34   | 0-8.84      | 0.5828                             | 0.7285   |
| Bacteroidetes   | 23.14  | 13.71-38.3  | 23.73  | 14.24-39.9  | 24.62  | 15.33-41.43 | 13     | 0.84-32.46  | 0.3691                             | 0.692167 |
| Firmicutes      | 48.1   | 17.83-67.01 | 56.1   | 48.27-61.94 | 50.66  | 15.5-60.42  | 70.44  | 34.07-95.27 | 0.4153                             | 0.692167 |
| Fusobacteria    | 14.98  | 8.68-36.44  | 10.95  | 0.67-22.15  | 11.47  | 4.27-38.48  | 9.6    | 1.01-14.72  | 0.0979                             | 0.4895   |
| Proteobacteria  | 5.45   | 4.14-21.13  | 5.17   | 3.45-13.5   | 5.74   | 1.67-17.79  | 4.58   | 0.76-24.16  | 0.9852                             | 0.9852   |

**CLASS**

| Bacterial group       | Day 0  |             | Day 7  |             | Day 21 |             | Day 42 |             | Day 0 vs Day 7 vs Day 21 vs Day 42 |          |
|-----------------------|--------|-------------|--------|-------------|--------|-------------|--------|-------------|------------------------------------|----------|
|                       | Median | Range       | Median | Range       | Median | Range       | Median | Range       | P value                            | Q value  |
| Actinobacteria        | 0      | 0-0.15      | 0      | 0-0.21      | 0      | 0-0.4       | 0.02   | 0-4.99      | 0.2998                             | 0.428286 |
| Coriobacteriia        | 1      | 0.19-2.75   | 1.18   | 0.8-1.58    | 1.27   | 0.1-3.09    | 1.28   | 0-4.11      | 0.5828                             | 0.647556 |
| Bacteroidia           | 23.14  | 13.71-38.3  | 23.73  | 14.24-39.9  | 24.62  | 15.33-41.43 | 13     | 0.84-32.46  | 0.3691                             | 0.461375 |
| Bacilli               | 0.98   | 0.51-8.08   | 1.72   | 0.25-9.08   | 1.78   | 0.67-14.2   | 4.1    | 1.12-31.68  | 0.1191                             | 0.397    |
| Clostridia            | 45.16  | 16.93-59.11 | 50.55  | 44.28-57.19 | 43.9   | 14.79-55.89 | 55.58  | 29.54-85.45 | 0.7892                             | 0.7892   |
| Erysipelotrichi       | 0.9    | 0-3.05      | 1.66   | 0.45-2.98   | 1.31   | 0.03-4.11   | 1.75   | 0.88-4.02   | 0.2261                             | 0.428286 |
| Fusobacteriia         | 14.98  | 8.68-36.44  | 10.95  | 0.67-22.15  | 11.47  | 4.27-38.48  | 9.6    | 1.01-14.72  | 0.0979                             | 0.397    |
| Betaproteobacteria    | 3.29   | 0.99-5.62   | 1.92   | 0.76-3.63   | 1.59   | 0.72-4.27   | 0.58   | 0.13-3.36   | 0.0576                             | 0.397    |
| Epsilonproteobacteria | 1.95   | 0.1-5       | 1.09   | 0.1-7.12    | 0.62   | 0-7.7       | 0.09   | 0-3.52      | 0.2174                             | 0.428286 |
| Gammaproteobacteria   | 0.64   | 0.08-14.55  | 1.49   | 0.49-7.26   | 1.92   | 0.62-14.19  | 1.62   | 0.48-18.99  | 0.2898                             | 0.428286 |

**ORDER**

| Bacterial group | Day 0  |       | Day 7  |       | Day 21 |       | Day 42 |       | Day 0 vs Day 7 vs Day 21 vs Day 42 |         |
|-----------------|--------|-------|--------|-------|--------|-------|--------|-------|------------------------------------|---------|
|                 | Median | Range | Median | Range | Median | Range | Median | Range | P value                            | Q value |

|                    |       |             |       |             |       |             |       |             |        |          |
|--------------------|-------|-------------|-------|-------------|-------|-------------|-------|-------------|--------|----------|
| Bifidobacteriales  | 0     | 0-0.15      | 0     | 0-0.21      | 0     | 0-0.4       | 0.01  | 0-4.96      | 0.4883 | 0.7425   |
| Coriobacteriales   | 1     | 0.19-2.75   | 1.18  | 0.8-1.58    | 1.27  | 0.1-3.09    | 1.28  | 0-4.11      | 0.5828 | 0.777067 |
| Bacteroidales      | 23.14 | 13.71-38.3  | 23.73 | 14.24-39.9  | 24.62 | 15.33-41.43 | 13    | 0.84-32.46  | 0.3691 | 0.7382   |
| Lactobacillales    | 0.77  | 0.33-3.98   | 0.9   | 0.21-8.51   | 0.77  | 0.39-14.16  | 1     | 0.6-30.71   | 0.9852 | 0.9852   |
| Turicibacterales   | 0.38  | 0.03-4.1    | 0.62  | 0.03-1.71   | 0.45  | 0-2.28      | 1.82  | 0.07-5.1    | 0.2561 | 0.61464  |
| Clostridiales      | 45.16 | 16.93-59.11 | 50.55 | 44.28-57.19 | 43.9  | 14.79-55.89 | 55.58 | 29.54-85.45 | 0.7892 | 0.914618 |
| Erysipelotrichales | 0.9   | 0-3.05      | 1.66  | 0.45-2.98   | 1.31  | 0.03-4.11   | 1.75  | 0.88-4.02   | 0.2261 | 0.61464  |
| Fusobacteriales    | 14.98 | 8.68-36.44  | 10.95 | 0.67-22.15  | 11.47 | 4.27-38.48  | 9.6   | 1.01-14.72  | 0.0979 | 0.5874   |
| Burkholderiales    | 3.29  | 0.99-5.62   | 1.92  | 0.76-3.63   | 1.59  | 0.72-4.27   | 0.58  | 0.13-3.36   | 0.0576 | 0.5874   |
| Campylobacteriales | 1.95  | 0.1-5       | 1.09  | 0.1-7.12    | 0.62  | 0-7.7       | 0.09  | 0-3.52      | 0.2174 | 0.61464  |
| Aeromonadales      | 0.05  | 0-14.46     | 0.13  | 0-6.76      | 0.05  | 0-13.28     | 0.07  | 0.02-18.58  | 0.8384 | 0.914618 |
| Enterobacteriales  | 0.51  | 0.08-0.79   | 0.59  | 0.4-6.86    | 1.26  | 0.38-4.49   | 1.09  | 0.38-10.56  | 0.495  | 0.7425   |

**FAMILY**

| Bacterial group       | Day 0             |             | Day 7               |             | Day 21             |             | Day 42            |             | Day 0 vs Day 7 vs Day 21 vs Day 42 |          |
|-----------------------|-------------------|-------------|---------------------|-------------|--------------------|-------------|-------------------|-------------|------------------------------------|----------|
|                       | Median            | Range       | Median              | Range       | Median             | Range       | Median            | Range       | P value                            | Q value  |
| Bifidobacteriaceae    | 0                 | 0-0.15      | 0                   | 0-0.21      | 0                  | 0-0.4       | 0.01              | 0-4.96      | 0.4883                             | 0.784929 |
| Coriobacteriaceae     | 1                 | 0.19-2.75   | 1.18                | 0.8-1.58    | 1.27               | 0.1-3.09    | 1.28              | 0-4.11      | 0.5828                             | 0.854773 |
| Bacteroidaceae        | 18.9              | 10.78-38.23 | 20.67               | 10.39-39.73 | 19.24              | 12.33-41.23 | 12.58             | 0.63-25.21  | 0.1191                             | 0.52404  |
| Porphyromonadaceae    | 0.02              | 0-2.62      | 0                   | 0-2.39      | 0.01               | 0-1.34      | 0                 | 0-1.35      | 0.2375                             | 0.626022 |
| Prevotellaceae        | 1.03              | 0-11.54     | 2.58                | 0-10.91     | 2.49               | 0-9.85      | 0.15              | 0-8.03      | 0.9637                             | 0.9852   |
| [Paraprevotellaceae]  | 0.23              | 0-3.63      | 0.5                 | 0-4         | 0.96               | 0-3.7       | 0.07              | 0-4.36      | 0.761                              | 0.984824 |
| Enterococcaceae       | 0.21              | 0-0.69      | 0.24                | 0.21-8.14   | 0.23               | 0.16-0.51   | 0.27              | 0.11-14.27  | 0.9189                             | 0.9852   |
| Streptococcaceae      | 0.48              | 0.29-3.06   | 0.49                | 0-6.51      | 0.44               | 0.23-12.68  | 0.59              | 0.29-21.7   | 0.7222                             | 0.984824 |
| Turicibacteraceae     | 0.38              | 0.03-4.1    | 0.62                | 0.03-1.71   | 0.45               | 0-2.28      | 1.82              | 0.07-5.1    | 0.2561                             | 0.626022 |
| o__Clostridiales;f__  | 1.09 <sup>a</sup> | 0.1-2.94    | 1.77 <sup>a,b</sup> | 0.21-3.41   | 0.5 <sup>a,b</sup> | 0-3.03      | 0.41 <sup>b</sup> | 0-1.09      | 0.0059                             | 0.1298   |
| Clostridiaceae        | 7.36              | 3.95-19.29  | 9.59                | 3.65-14.8   | 8.78               | 3.75-16.53  | 8.55              | 4.12-43.89  | 0.8614                             | 0.9852   |
| Lachnospiraceae       | 19.39             | 10.13-32.62 | 25.34               | 8.74-33.42  | 19.97              | 7.14-24.64  | 19.71             | 13.05-47.17 | 0.2898                             | 0.63756  |
| Peptostreptococcaceae | 0.11              | 0-0.68      | 0.11                | 0-0.58      | 0.63               | 0.12-3.24   | 0.53              | 0-8.27      | 0.2123                             | 0.626022 |
| Ruminococcaceae       | 4.18              | 0.23-10.02  | 4.99                | 1.11-10.2   | 2.1                | 0.14-9.02   | 3.92              | 0.48-7.1    | 0.3691                             | 0.7382   |
| Veillonellaceae       | 4.18              | 1.19-30.56  | 8.4                 | 0.23-23.21  | 5.63               | 0.91-26.01  | 7.46              | 0.58-29.23  | 0.9852                             | 0.9852   |
| Erysipelotrichaceae   | 0.9               | 0-3.05      | 1.66                | 0.45-2.98   | 1.31               | 0.03-4.11   | 1.75              | 0.88-4.02   | 0.2261                             | 0.626022 |

|                     |       |            |       |            |       |            |      |            |        |          |
|---------------------|-------|------------|-------|------------|-------|------------|------|------------|--------|----------|
| Fusobacteriaceae    | 14.98 | 8.68-36.44 | 10.95 | 0.67-22.15 | 11.47 | 4.27-38.48 | 9.6  | 1.01-14.72 | 0.0979 | 0.52404  |
| Alcaligenaceae      | 3.29  | 0.99-5.62  | 1.92  | 0.76-3.63  | 1.59  | 0.72-4.27  | 0.58 | 0.13-3.36  | 0.0576 | 0.52404  |
| Campylobacteraceae  | 0.47  | 0-2.24     | 0.05  | 0-1.56     | 0     | 0-0.71     | 0    | 0-0.71     | 0.1001 | 0.52404  |
| Helicobacteraceae   | 0.52  | 0.04-4.87  | 0.15  | 0-7.12     | 0.59  | 0-7.08     | 0.09 | 0-3.52     | 0.4995 | 0.784929 |
| Succinivibrionaceae | 0.05  | 0-14.46    | 0.13  | 0-6.76     | 0.05  | 0-13.28    | 0.07 | 0.02-18.58 | 0.8384 | 0.9852   |
| Enterobacteriaceae  | 0.51  | 0.08-0.79  | 0.59  | 0.4-6.86   | 1.26  | 0.38-4.49  | 1.09 | 0.38-10.56 | 0.495  | 0.784929 |

**GENUS**

| Bacterial group                | Day 0                   |                 | Day 7                     |                  | Day 21                   |               | Day 42                  |               | Day 0 vs Day 7 vs Day 21 vs Day 42 |               |
|--------------------------------|-------------------------|-----------------|---------------------------|------------------|--------------------------|---------------|-------------------------|---------------|------------------------------------|---------------|
|                                | Median                  | Range           | Median                    | Range            | Median                   | Range         | Median                  | Range         | P value                            | Q value       |
| Bifidobacterium                | 0                       | 0-0.15          | 0                         | 0-0.21           | 0                        | 0-0.4         | 0.01                    | 0-4.96        | 0.4883                             | 0.787673      |
| Collinsella                    | 0.99                    | 0.19-2.22       | 1.18                      | 0.55-1.41        | 1.27                     | 0.1-2.49      | 1.28                    | 0-4.11        | 0.6823                             | 0.913555      |
| Slackia                        | 0                       | 0-0.53          | 0                         | 0-0.2            | 0.01                     | 0-0.6         | 0                       | 0-0.02        | 0.416                              | 0.776438      |
| Bacteroides                    | 18.9                    | 10.78-38.23     | 20.66                     | 10.39-39.73      | 19.21                    | 12.33-41.23   | 12.58                   | 0.63-25.21    | 0.1191                             | 0.50102       |
| Parabacteroides                | 0.02                    | 0-2.62          | 0                         | 0-2.39           | 0.01                     | 0-1.34        | 0                       | 0-1.35        | 0.2375                             | 0.608594      |
| Prevotella                     | 1.03                    | 0-11.54         | 2.58                      | 0-10.91          | 2.49                     | 0-9.85        | 0.15                    | 0-8.03        | 0.9637                             | 0.9852        |
| [Prevotella]                   | 0.23                    | 0-3.62          | 0.5                       | 0-4              | 0.96                     | 0-3.7         | 0.07                    | 0-4.35        | 0.7353                             | 0.913555      |
| Enterococcus                   | 0.21                    | 0-0.69          | 0.24                      | 0.21-8.14        | 0.23                     | 0.16-0.51     | 0.27                    | 0.11-14.27    | 0.9189                             | 0.9852        |
| Streptococcus                  | 0.48                    | 0.29-3.06       | 0.49                      | 0-6.51           | 0.44                     | 0.23-12.68    | 0.59                    | 0.29-21.67    | 0.7222                             | 0.913555      |
| Turicibacter                   | 0.38                    | 0.03-4.1        | 0.62                      | 0.03-1.71        | 0.45                     | 0-2.28        | 1.82                    | 0.07-5.1      | 0.2561                             | 0.617653      |
| <b>o__Clostridiales;f__g__</b> | <b>1.09<sup>a</sup></b> | <b>0.1-2.94</b> | <b>1.77<sup>a,b</sup></b> | <b>0.21-3.41</b> | <b>0.5<sup>a,b</sup></b> | <b>0-3.03</b> | <b>0.41<sup>b</sup></b> | <b>0-1.09</b> | <b>0.0059</b>                      | <b>0.2419</b> |
| f__Clostridiaceae;__           | 6.75                    | 3.67-18.77      | 7.54                      | 3.65-14.22       | 7.59                     | 1.94-15.23    | 7.9                     | 3.71-43.19    | 0.8614                             | 0.9852        |
| f__Clostridiaceae;g__          | 0.38                    | 0-0.89          | 0.42                      | 0-1.89           | 0.7                      | 0-1.8         | 0.42                    | 0.19-1.34     | 0.7006                             | 0.913555      |
| Clostridium                    | 0                       | 0-0.19          | 0.16                      | 0-1.18           | 0.19                     | 0-2.03        | 0                       | 0-4.56        | 0.5573                             | 0.826004      |
| f__Lachnospiraceae;__          | 4.81                    | 1.76-10.04      | 7.01                      | 1.51-20.03       | 4.29                     | 2.85-8.39     | 4.68                    | 1.55-31.71    | 0.8964                             | 0.9852        |
| f__Lachnospiraceae;g__         | 3.54                    | 1.13-5.36       | 3.13                      | 0.81-5.05        | 1.92                     | 0.96-9.46     | 1.37                    | 0.54-4.99     | 0.0803                             | 0.50102       |
| Blautia                        | 4.67                    | 2.16-13.73      | 6.92                      | 4.69-10.77       | 7.85                     | 0.99-13.41    | 9.6                     | 3.15-18.4     | 0.1993                             | 0.586027      |
| Coprococcus                    | 0                       | 0-0.35          | 0.1                       | 0-0.56           | 0                        | 0-0.4         | 0                       | 0-0.17        | 0.0803                             | 0.50102       |
| Dorea                          | 0.9                     | 0-2.86          | 1.23                      | 0-2.93           | 0.28                     | 0-2.37        | 0.16                    | 0-3.47        | 0.4281                             | 0.776438      |
| Roseburia                      | 0.05                    | 0-0.5           | 0.04                      | 0-1.05           | 0                        | 0-0.72        | 0                       | 0-1.66        | 0.9469                             | 0.9852        |
| [Ruminococcus]                 | 2.95                    | 0.34-7.17       | 2.31                      | 1.15-5.35        | 2.65                     | 0.22-5.17     | 2.91                    | 0.33-4.97     | 0.7892                             | 0.951682      |
| f__Peptostreptococcaceae;g__   | 0.11                    | 0-0.4           | 0.05                      | 0-0.58           | 0.55                     | 0-3.24        | 0.53                    | 0-5.15        | 0.2085                             | 0.586027      |

|                            |                   |            |                     |            |                     |            |                   |            |        |          |
|----------------------------|-------------------|------------|---------------------|------------|---------------------|------------|-------------------|------------|--------|----------|
| f__Ruminococcaceae;g__     | 0.74              | 0.08-3.52  | 0.75                | 0.1-2.38   | 0.56                | 0-3.54     | 0.81              | 0-4.22     | 0.204  | 0.586027 |
| Faecalibacterium           | 3.18              | 0.15-5.65  | 3.28                | 0.71-9.05  | 1.66                | 0.14-6.02  | 1.51              | 0.28-5.73  | 0.4402 | 0.776438 |
| Oscillospira               | 0.02              | 0-0.79     | 0.04                | 0-0.25     | 0                   | 0-0.59     | 0                 | 0-0.15     | 0.4318 | 0.776438 |
| Ruminococcus               | 0.06              | 0-0.19     | 0.06                | 0-0.39     | 0.09                | 0-0.65     | 0.05              | 0-0.16     | 0.1077 | 0.50102  |
| Megamonas                  | 2.88              | 0.52-29.31 | 7.29                | 0.23-21.41 | 4.93                | 0.52-25.91 | 6.51              | 0.38-29.17 | 0.9852 | 0.9852   |
| Phascolarctobacterium      | 0.54              | 0-1.35     | 1.11                | 0-2.29     | 0.46                | 0-1.41     | 0.1               | 0-1.86     | 0.5641 | 0.826004 |
| f__Erysipelotrichaceae;g__ | 0.13              | 0-1.44     | 0.36                | 0-2.02     | 0.11                | 0.02-2.3   | 0.35              | 0-0.97     | 0.6182 | 0.874007 |
| Allobaculum                | 0.03              | 0-0.18     | 0.06                | 0-0.28     | 0.05                | 0-0.25     | 0.01              | 0-0.6      | 0.4394 | 0.776438 |
| Catenibacterium            | 0.19              | 0-2.63     | 0.06                | 0-2.26     | 0.36                | 0-0.99     | 0.27              | 0-2.61     | 0.8866 | 0.9852   |
| [Eubacterium]              | 0.17 <sup>a</sup> | 0-0.67     | 0.28 <sup>a,b</sup> | 0.06-0.96  | 0.19 <sup>a,b</sup> | 0-1.7      | 0.64 <sup>b</sup> | 0.23-1.51  | 0.0273 | 0.50102  |
| Cetobacterium              | 0.04              | 0-0.14     | 0                   | 0-0.17     | 0                   | 0-0.19     | 0                 | 0-0.07     | 0.4367 | 0.776438 |
| Fusobacterium              | 14.89             | 8.68-36.3  | 10.9                | 0.67-21.98 | 11.47               | 4.27-38.29 | 9.6               | 1.01-14.72 | 0.0979 | 0.50102  |
| Sutterella                 | 3.29              | 0.99-5.62  | 1.92                | 0.76-3.63  | 1.59                | 0.72-4.27  | 0.58              | 0.13-3.36  | 0.0576 | 0.50102  |
| Campylobacter              | 0.47              | 0-2.24     | 0.05                | 0-1.56     | 0                   | 0-0.71     | 0                 | 0-0.71     | 0.1001 | 0.50102  |
| Helicobacter               | 0.52              | 0.04-4.87  | 0.15                | 0-7.12     | 0.59                | 0-7.08     | 0.09              | 0-3.52     | 0.4995 | 0.787673 |
| f__Succinivibrionaceae;__  | 0.02              | 0-0.47     | 0                   | 0-0.76     | 0                   | 0-1.55     | 0                 | 0-3.88     | 0.4545 | 0.776438 |
| f__Succinivibrionaceae;g__ | 0.02              | 0-13.93    | 0.07                | 0-6.7      | 0.05                | 0-11.63    | 0.06              | 0-14.68    | 0.2144 | 0.586027 |
| Succinivibrio              | 0                 | 0-0.31     | 0.03                | 0-0.11     | 0.01                | 0-0.16     | 0                 | 0-0.03     | 0.1222 | 0.50102  |
| f__Enterobacteriaceae;g__  | 0.51              | 0.08-0.79  | 0.59                | 0.4-6.86   | 1.18                | 0.38-4.49  | 1.09              | 0.38-10.56 | 0.1852 | 0.586027 |

**SPECIES**

| Bacterial group        | Day 0          |            | Day 7             |            | Day 21            |            | Day 42         |            | Day 0 vs Day 7 vs Day 21 vs Day 42 |          |
|------------------------|----------------|------------|-------------------|------------|-------------------|------------|----------------|------------|------------------------------------|----------|
|                        | Median         | Range      | Median            | Range      | Median            | Range      | Median         | Range      | P value                            | Q value  |
| g__Bifidobacterium;s__ | 0              | 0-0.15     | 0                 | 0-0.18     | 0                 | 0-0.4      | 0.01           | 0-4.96     | 0.2156                             | 0.598889 |
| Collinsella stercoris  | 0.99           | 0.19-2.09  | 1.11              | 0.55-1.41  | 1.27              | 0.1-2.26   | 1.28           | 0-4.11     | 0.9297                             | 0.983367 |
| g__Slackia;s__         | 0              | 0-0.53     | 0                 | 0-0.2      | 0.01              | 0-0.6      | 0              | 0-0.02     | 0.416                              | 0.783621 |
| g__Bacteroides;__      | 5.76           | 2.75-16.62 | 5.36              | 3.2-10.49  | 6.21              | 3.58-18.91 | 5.08           | 0-8.2      | 0.5828                             | 0.88303  |
| g__Bacteroides;s__     | 8.55           | 1.86-18.36 | 6.9               | 3.21-20.44 | 10.34             | 1.84-28.55 | 3.24           | 0.23-12.98 | 0.6481                             | 0.900139 |
| Bacteroides fragilis   | 0 <sup>a</sup> | 0-0.1      | 0.05 <sup>a</sup> | 0-0.42     | 0.13 <sup>a</sup> | 0-0.29     | 0 <sup>a</sup> | 0-0.12     | 0.0186                             | 0.465    |
| Bacteroides plebeius   | 3              | 0.24-10.94 | 3.8               | 0.18-10.16 | 3.45              | 0.2-6.7    | 0.75           | 0.1-7.89   | 0.1357                             | 0.565417 |
| Bacteroides uniformis  | 0 <sup>a</sup> | 0-1.22     | 0.07 <sup>a</sup> | 0-15.84    | 0 <sup>a</sup>    | 0-5.39     | 0 <sup>a</sup> | 0-0.46     | 0.0471                             | 0.5385   |

|                                     |                         |                 |                           |                  |                          |               |                         |               |               |               |
|-------------------------------------|-------------------------|-----------------|---------------------------|------------------|--------------------------|---------------|-------------------------|---------------|---------------|---------------|
| g__Parabacteroides;s__              | 0.01                    | 0-2.62          | 0                         | 0-2.02           | 0.01                     | 0-1.34        | 0                       | 0-1.24        | 0.5118        | 0.825484      |
| Prevotella copri                    | 1.03                    | 0-11.54         | 2.58                      | 0-10.91          | 2.49                     | 0-9.85        | 0.15                    | 0-8.03        | 0.9637        | 0.983367      |
| g__[Prevotella];s__                 | 0.23                    | 0-3.62          | 0.5                       | 0-4              | 0.96                     | 0-3.7         | 0.07                    | 0-4.35        | 0.7353        | 0.942692      |
| g__Enterococcus;s__                 | 0.21                    | 0-0.69          | 0.24                      | 0.21-8.14        | 0.23                     | 0.16-0.51     | 0.27                    | 0.11-14.27    | 0.9189        | 0.983367      |
| g__Streptococcus;s__                | 0.48                    | 0.29-3.06       | 0.49                      | 0-6.51           | 0.44                     | 0.23-12.68    | 0.59                    | 0.29-21.67    | 0.7222        | 0.942692      |
| g__Turicibacter;s__                 | 0.38                    | 0.03-4.1        | 0.62                      | 0.03-1.71        | 0.45                     | 0-2.28        | 1.82                    | 0.07-5.1      | 0.2561        | 0.673947      |
| <b>o__Clostridiales;f__;g__;s__</b> | <b>1.09<sup>a</sup></b> | <b>0.1-2.94</b> | <b>1.77<sup>a,b</sup></b> | <b>0.21-3.41</b> | <b>0.5<sup>a,b</sup></b> | <b>0-3.03</b> | <b>0.41<sup>b</sup></b> | <b>0-1.09</b> | <b>0.0059</b> | <b>0.295</b>  |
| f__Clostridiaceae;__;s__            | 6.75                    | 3.67-18.77      | 7.54                      | 3.65-14.22       | 7.59                     | 1.94-15.23    | 7.9                     | 3.71-43.19    | 0.8614        | 0.983367      |
| f__Clostridiaceae;g__;s__           | 0.38                    | 0-0.89          | 0.42                      | 0-1.89           | 0.7                      | 0-1.8         | 0.42                    | 0.19-1.34     | 0.7006        | 0.942692      |
| g__Clostridium;__                   | 0                       | 0-0.16          | 0                         | 0-0.92           | 0.08                     | 0-0.24        | 0                       | 0-4.56        | 0.7885        | 0.983367      |
| Clostridium perfringens             | 0                       | 0-0.19          | 0                         | 0-0.41           | 0.02                     | 0-2.03        | 0                       | 0-0.34        | 0.302         | 0.686364      |
| f__Lachnospiraceae;__;s__           | 4.81                    | 1.76-10.04      | 7.01                      | 1.51-20.03       | 4.29                     | 2.85-8.39     | 4.68                    | 1.55-31.71    | 0.8964        | 0.983367      |
| f__Lachnospiraceae;g__;s__          | 3.54                    | 1.13-5.36       | 3.13                      | 0.81-5.05        | 1.92                     | 0.96-9.46     | 1.37                    | 0.54-4.99     | 0.0803        | 0.5385        |
| g__Blautia;s__                      | 2.33                    | 0.44-9.14       | 3.43                      | 2.12-4.75        | 2.84                     | 0-9.04        | 3.28                    | 1.33-6.32     | 0.2898        | 0.686364      |
| Blautia producta                    | 2.89                    | 1.72-5.86       | 3.96                      | 2.57-7.14        | 3.86                     | 0.99-6.82     | 5.1                     | 1.82-15.56    | 0.2725        | 0.68125       |
| g__Coprococcus;s__                  | 0                       | 0-0.35          | 0.1                       | 0-0.56           | 0                        | 0-0.4         | 0                       | 0-0.17        | 0.0803        | 0.5385        |
| g__Dorea;s__                        | 0.9                     | 0-2.86          | 1.23                      | 0-2.93           | 0.28                     | 0-2.37        | 0.16                    | 0-3.47        | 0.4281        | 0.783621      |
| g__Roseburia;s__                    | 0.05                    | 0-0.5           | 0.04                      | 0-1.05           | 0                        | 0-0.72        | 0                       | 0-1.66        | 0.9469        | 0.983367      |
| g__[Ruminococcus];__                | 0.16                    | 0-3.83          | 0.08                      | 0-3.44           | 0.02                     | 0-0.89        | 0.03                    | 0-1.14        | 0.8179        | 0.983367      |
| g__[Ruminococcus];s__               | 0.53                    | 0-1.42          | 0.55                      | 0.2-1.77         | 0.39                     | 0-1.61        | 0.31                    | 0-2.41        | 0.635         | 0.900139      |
| [Ruminococcus] gnavus               | 1.23                    | 0-5.33          | 1.48                      | 0.79-3.43        | 1.37                     | 0-3.71        | 2.04                    | 0-3.1         | 0.9297        | 0.983367      |
| f__Peptostreptococcaceae;g__;s__    | 0.11                    | 0-0.4           | 0.05                      | 0-0.58           | 0.55                     | 0-3.24        | 0.53                    | 0-5.15        | 0.2085        | 0.598889      |
| f__Ruminococcaceae;g__;s__          | 0.74                    | 0.08-3.52       | 0.75                      | 0.1-2.38         | 0.56                     | 0-3.54        | 0.81                    | 0-4.22        | 0.204         | 0.598889      |
| Faecalibacterium prausnitzii        | 3.18                    | 0.15-5.65       | 3.28                      | 0.71-9.05        | 1.66                     | 0.14-6.02     | 1.51                    | 0.28-5.73     | 0.4402        | 0.783621      |
| g__Oscillospira;s__                 | 0.02                    | 0-0.79          | 0.04                      | 0-0.25           | 0                        | 0-0.59        | 0                       | 0-0.15        | 0.4318        | 0.783621      |
| g__Ruminococcus;s__                 | 0.06                    | 0-0.19          | 0.06                      | 0-0.39           | 0.09                     | 0-0.65        | 0.05                    | 0-0.16        | 0.1077        | 0.5385        |
| g__Megamonas;s__                    | 2.88                    | 0.52-29.31      | 7.29                      | 0.23-21.41       | 4.93                     | 0.52-25.91    | 6.51                    | 0.38-29.17    | 0.9852        | 0.9852        |
| g__Phascolarctobacterium;s__        | 0.54                    | 0-1.35          | 1.11                      | 0-2.29           | 0.46                     | 0-1.41        | 0.1                     | 0-1.86        | 0.5641        | 0.881406      |
| f__Erysipelotrichaceae;g__;s__      | 0.13                    | 0-1.44          | 0.36                      | 0-2.02           | 0.11                     | 0.02-2.3      | 0.35                    | 0-0.97        | 0.6182        | 0.900139      |
| g__Allobaculum;s__                  | 0.03                    | 0-0.18          | 0.06                      | 0-0.28           | 0.05                     | 0-0.25        | 0.01                    | 0-0.6         | 0.4394        | 0.783621      |
| g__Catenibacterium;s__              | 0.19                    | 0-2.63          | 0.06                      | 0-2.26           | 0.36                     | 0-0.99        | 0.27                    | 0-2.61        | 0.8866        | 0.983367      |
| <b>[Eubacterium] bifforme</b>       | <b>0.13<sup>a</sup></b> | <b>0-0.67</b>   | <b>0.18<sup>a</sup></b>   | <b>0-0.96</b>    | <b>0.16<sup>a</sup></b>  | <b>0-1.67</b> | <b>0.5<sup>a</sup></b>  | <b>0-1.09</b> | <b>0.0469</b> | <b>0.5385</b> |
| [Eubacterium] dolichum              | 0.01                    | 0-0.1           | 0.07                      | 0-0.15           | 0.04                     | 0-0.06        | 0.04                    | 0-0.98        | 0.2014        | 0.598889      |
| Cetobacterium somerae               | 0.04                    | 0-0.14          | 0                         | 0-0.17           | 0                        | 0-0.19        | 0                       | 0-0.07        | 0.4367        | 0.783621      |

|                                |       |           |      |            |       |            |      |            |        |          |
|--------------------------------|-------|-----------|------|------------|-------|------------|------|------------|--------|----------|
| g__Fusobacterium;s__           | 14.89 | 8.68-36.3 | 10.9 | 0.67-21.98 | 11.47 | 4.27-38.29 | 9.6  | 1.01-14.72 | 0.0979 | 0.5385   |
| g__Sutterella;s__              | 3.29  | 0.99-5.62 | 1.92 | 0.76-3.63  | 1.59  | 0.72-4.27  | 0.58 | 0.13-3.36  | 0.0576 | 0.5385   |
| g__Campylobacter;s__           | 0.47  | 0-2.24    | 0.05 | 0-1.56     | 0     | 0-0.71     | 0    | 0-0.71     | 0.1001 | 0.5385   |
| g__Helicobacter;s__            | 0.52  | 0.04-4.24 | 0.15 | 0-7.12     | 0.59  | 0-6.17     | 0.09 | 0-3.52     | 0.4995 | 0.825484 |
| f__Succinivibrionaceae;__;__   | 0.02  | 0-0.47    | 0    | 0-0.76     | 0     | 0-1.55     | 0    | 0-3.88     | 0.4545 | 0.783621 |
| f__Succinivibrionaceae;g__;s__ | 0.02  | 0-13.93   | 0.07 | 0-6.7      | 0.05  | 0-11.63    | 0.06 | 0-14.68    | 0.2144 | 0.598889 |
| g__Succinivibrio;s__           | 0     | 0-0.31    | 0.03 | 0-0.11     | 0.01  | 0-0.16     | 0    | 0-0.03     | 0.1222 | 0.555455 |
| f__Enterobacteriaceae;g__;s__  | 0.51  | 0.08-0.79 | 0.59 | 0.4-6.86   | 1.18  | 0.38-4.49  | 1.09 | 0.38-10.56 | 0.1852 | 0.598889 |
