# Supplementary material for: Effects of metronidazole on the fecal microbiome and metabolome in healthy dogs
Source: PubMed Central journal article supplement (PMC7517498; doi:10.1111/jvim.15871), 2020-08-28
Supplement: JVIM-34-1853-s002.pdf [file JVIM-34-1853-s002.pdf]

**PHYLUM**

| Bacterial group | Day 0  |             | Day 7  |             | Day 21 |             | Day 42 |             | Day 0 vs Day 7 vs Day 21 vs Day 42 |         |
|-----------------|--------|-------------|--------|-------------|--------|-------------|--------|-------------|------------------------------------|---------|
|                 | Median | Range       | Median | Range       | Median | Range       | Median | Range       | P value                            | Q value |
| Actinobacteria  | 1.21   | 0.58-2.38   | 2.08   | 0.46-3.94   | 1.43   | 0.19-5.43   | 1.87   | 0.38-4      | 0.3916                             | 0.4895  |
| Bacteroidetes   | 30.28  | 7.69-44.94  | 17.63  | 1.01-43.57  | 20.33  | 0.4-47.76   | 17.62  | 0.89-32.94  | 0.1116                             | 0.36175 |
| Firmicutes      | 48.19  | 20.91-80.31 | 62.77  | 30.55-92.35 | 63.35  | 25.98-83.58 | 65.93  | 42.47-75.26 | 0.3273                             | 0.4895  |
| Fusobacteria    | 13.57  | 5.21-32.62  | 11.39  | 2.26-30.43  | 13.09  | 2.15-26.04  | 13.06  | 3.24-29.49  | 0.5222                             | 0.5222  |
| Proteobacteria  | 5.28   | 1.45-10.99  | 5.35   | 1.24-7.76   | 7.8    | 1.55-13.68  | 4.94   | 0.98-16.75  | 0.1447                             | 0.36175 |

**CLASS**

| Bacterial group       | Day 0  |             | Day 7  |            | Day 21 |             | Day 42 |             | Day 0 vs Day 7 vs Day 21 vs Day 42 |          |
|-----------------------|--------|-------------|--------|------------|--------|-------------|--------|-------------|------------------------------------|----------|
|                       | Median | Range       | Median | Range      | Median | Range       | Median | Range       | P value                            | Q value  |
| Actinobacteria        | 0.08   | 0-0.19      | 0.14   | 0-0.23     | 0.07   | 0-0.58      | 0.06   | 0-0.38      | 0.7969                             | 0.885444 |
| Coriobacteriia        | 1.2    | 0.44-2.38   | 1.96   | 0.46-3.8   | 1.35   | 0.19-4.85   | 1.73   | 0-4         | 0.5222                             | 0.885444 |
| Bacteroidia           | 30.28  | 7.69-44.94  | 17.63  | 1.01-43.57 | 20.33  | 0.4-47.76   | 17.62  | 0.89-32.94  | 0.1116                             | 0.558    |
| Bacilli               | 0.96   | 0.71-22.97  | 1.08   | 0.6-4.06   | 1.55   | 0.58-13.12  | 1.86   | 0.6-24.12   | 0.7892                             | 0.885444 |
| Clostridia            | 40.83  | 20.13-71.64 | 60.93  | 27.96-84.7 | 54.7   | 24.77-78.37 | 54.35  | 40.82-67.27 | 0.2898                             | 0.885444 |
| Erysipelotrichi       | 1.03   | 0-7.92      | 1.2    | 0.35-6.88  | 0.34   | 0-3.19      | 0.99   | 0.03-7.05   | 0.5828                             | 0.885444 |
| Fusobacteriia         | 13.57  | 5.21-32.62  | 11.39  | 2.26-30.43 | 13.09  | 2.15-26.04  | 13.06  | 3.24-29.49  | 0.5222                             | 0.885444 |
| Betaproteobacteria    | 1.9    | 0.18-5.18   | 0.97   | 0.18-6.08  | 0.81   | 0.28-7.44   | 0.41   | 0.28-1.96   | 0.0841                             | 0.558    |
| Epsilonproteobacteria | 0.14   | 0-3.58      | 0.15   | 0-0.86     | 0.29   | 0.06-1.36   | 0.25   | 0-2.24      | 0.9203                             | 0.9203   |
| Gammaproteobacteria   | 1.89   | 0.61-5.74   | 1.3    | 0.77-4.49  | 3.97   | 0.66-13.25  | 2.16   | 0.45-16.17  | 0.7892                             | 0.885444 |

**ORDER**

| Bacterial group | Day 0  |       | Day 7  |       | Day 21 |       | Day 42 |       | Day 0 vs Day 7 vs Day 21 vs Day 42 |         |
|-----------------|--------|-------|--------|-------|--------|-------|--------|-------|------------------------------------|---------|
|                 | Median | Range | Median | Range | Median | Range | Median | Range | P value                            | Q value |

|                    |       |             |       |            |       |             |       |             |        |        |
|--------------------|-------|-------------|-------|------------|-------|-------------|-------|-------------|--------|--------|
| Bifidobacteriales  | 0.08  | 0-0.19      | 0.07  | 0-0.21     | 0     | 0-0.58      | 0.06  | 0-0.38      | 0.8423 | 0.9203 |
| Coriobacteriales   | 1.2   | 0.44-2.38   | 1.96  | 0.46-3.8   | 1.35  | 0.19-4.85   | 1.73  | 0-4         | 0.5222 | 0.9203 |
| Bacteroidales      | 30.28 | 7.69-44.94  | 17.63 | 1.01-43.57 | 20.33 | 0.4-47.76   | 17.62 | 0.89-32.94  | 0.1116 | 0.6696 |
| Lactobacillales    | 0.76  | 0.62-11.17  | 0.94  | 0.6-1.65   | 0.82  | 0.58-12.93  | 1.4   | 0.58-23.89  | 0.7173 | 0.9203 |
| Turicibacterales   | 0.19  | 0-18.99     | 0.1   | 0-2.55     | 0.18  | 0-5.44      | 0.18  | 0-6.03      | 0.5566 | 0.9203 |
| Clostridiales      | 40.83 | 20.13-71.64 | 60.93 | 27.96-84.7 | 54.7  | 24.77-78.37 | 54.35 | 40.82-67.27 | 0.2898 | 0.9203 |
| Erysipelotrichales | 1.03  | 0-7.92      | 1.2   | 0.35-6.88  | 0.34  | 0-3.19      | 0.99  | 0.03-7.05   | 0.5828 | 0.9203 |
| Fusobacteriales    | 13.57 | 5.21-32.62  | 11.39 | 2.26-30.43 | 13.09 | 2.15-26.04  | 13.06 | 3.24-29.49  | 0.5222 | 0.9203 |
| Burkholderiales    | 1.9   | 0.18-5.18   | 0.97  | 0.18-6.08  | 0.81  | 0.28-7.44   | 0.41  | 0.28-1.96   | 0.0841 | 0.6696 |
| Campylobacteriales | 0.14  | 0-3.58      | 0.15  | 0-0.86     | 0.29  | 0.06-1.36   | 0.25  | 0-2.24      | 0.9203 | 0.9203 |
| Aeromonadales      | 0.09  | 0-1.77      | 0.06  | 0-3.61     | 0.07  | 0-6.56      | 0.07  | 0-3.13      | 0.8887 | 0.9203 |
| Enterobacteriales  | 0.75  | 0.51-5.62   | 0.9   | 0.39-4.44  | 1.44  | 0.49-13.25  | 0.88  | 0.12-16     | 0.7892 | 0.9203 |

**FAMILY**

| Bacterial group       | Day 0              |            | Day 7             |            | Day 21             |            | Day 42             |             | Day 0 vs Day 7 vs Day 21 vs Day 42 |          |
|-----------------------|--------------------|------------|-------------------|------------|--------------------|------------|--------------------|-------------|------------------------------------|----------|
|                       | Median             | Range      | Median            | Range      | Median             | Range      | Median             | Range       | P value                            | Q value  |
| Bifidobacteriaceae    | 0.08               | 0-0.19     | 0.07              | 0-0.21     | 0                  | 0-0.58     | 0.06               | 0-0.38      | 0.8423                             | 0.922519 |
| Coriobacteriaceae     | 1.2                | 0.44-2.38  | 1.96              | 0.46-3.8   | 1.35               | 0.19-4.85  | 1.73               | 0-4         | 0.5222                             | 0.788494 |
| Bacteroidaceae        | 27.74              | 5.3-31.35  | 10.33             | 1.01-26.21 | 20.05              | 0.32-42.75 | 14.66              | 0.79-28.87  | 0.2561                             | 0.736288 |
| Prevotellaceae        | 0.61               | 0-9.45     | 0.12              | 0-17.75    | 0.11               | 0.07-0.45  | 0.12               | 0-4.01      | 0.1975                             | 0.648929 |
| [Paraprevotellaceae]  | 1.86               | 0-8.66     | 0.45              | 0-17.2     | 0.14               | 0-5.88     | 0.2                | 0-3.82      | 0.3189                             | 0.7567   |
| Enterococcaceae       | 0.25               | 0.2-10.11  | 0.27              | 0.22-0.37  | 0.26               | 0.2-1.99   | 0.29               | 0.18-1.17   | 0.7793                             | 0.914365 |
| Lactobacillaceae      | 0.1                | 0-0.41     | 0.18              | 0-0.34     | 0.07               | 0-10.16    | 0.15               | 0-21.28     | 0.5566                             | 0.788494 |
| Streptococcaceae      | 0.5                | 0.34-0.6   | 0.47              | 0.37-1.16  | 0.47               | 0.34-0.77  | 0.58               | 0.37-1.84   | 0.5222                             | 0.788494 |
| Turicibacteraceae     | 0.19               | 0-18.99    | 0.1               | 0-2.55     | 0.18               | 0-5.44     | 0.18               | 0-6.03      | 0.5566                             | 0.788494 |
| o_Clostridiales;f__   | 0.2                | 0-3.17     | 0.28              | 0-1.57     | 0.2                | 0-1.76     | 0.28               | 0-1.42      | 0.9651                             | 0.9651   |
| Clostridiaceae        | 9.11               | 1.98-24.95 | 13.93             | 4.49-36.01 | 17.93              | 2.88-62.04 | 17.91              | 4.88-41.14  | 0.1755                             | 0.648929 |
| Lachnospiraceae       | 14.94 <sup>a</sup> | 2.5-49.24  | 32.9 <sup>a</sup> | 8.8-43.95  | 20.26 <sup>a</sup> | 7.24-29.74 | 23.93 <sup>a</sup> | 15.64-39.78 | 0.0411                             | 0.57845  |
| Peptococcaceae        | 0                  | 0-0        | 0                 | 0-0.05     | 0.01               | 0-0.19     | 0                  | 0-0.88      | 0.1299                             | 0.648929 |
| Peptostreptococcaceae | 0.05               | 0-0.36     | 0                 | 0-1.34     | 0.07               | 0-9        | 0                  | 0-11.15     | 0.329                              | 0.7567   |
| Ruminococcaceae       | 1.7                | 0.18-11.24 | 2.64              | 0.59-11.06 | 2.45               | 0.12-7.41  | 1.94               | 0.27-11.26  | 0.3916                             | 0.788494 |
| Veillonellaceae       | 5.53               | 0.85-15.47 | 3.5               | 1.56-23.95 | 1.54               | 0.42-15.06 | 2.97               | 0.6-18.93   | 0.0503                             | 0.57845  |

|                     |       |            |       |            |       |            |       |            |        |          |
|---------------------|-------|------------|-------|------------|-------|------------|-------|------------|--------|----------|
| Erysipelotrichaceae | 1.03  | 0-7.92     | 1.2   | 0.35-6.88  | 0.34  | 0-3.19     | 0.99  | 0.03-7.05  | 0.5828 | 0.788494 |
| Fusobacteriaceae    | 13.57 | 5.21-32.62 | 11.39 | 2.26-30.43 | 13.09 | 2.15-26.04 | 13.06 | 3.24-29.49 | 0.5222 | 0.788494 |
| Alcaligenaceae      | 1.9   | 0.18-5.18  | 0.97  | 0.18-6.08  | 0.81  | 0.28-7.44  | 0.41  | 0.28-1.96  | 0.0841 | 0.644767 |
| Campylobacteraceae  | 0.01  | 0-0.64     | 0     | 0-0        | 0     | 0-0.11     | 0     | 0-1.46     | 0.1439 | 0.648929 |
| Helicobacteraceae   | 0.14  | 0-3.39     | 0.15  | 0-0.86     | 0.29  | 0.06-1.36  | 0.25  | 0-1.4      | 0.7951 | 0.914365 |
| Succinivibrionaceae | 0.09  | 0-1.77     | 0.06  | 0-3.61     | 0.07  | 0-6.56     | 0.07  | 0-3.13     | 0.8887 | 0.929095 |
| Enterobacteriaceae  | 0.75  | 0.51-5.62  | 0.9   | 0.39-4.44  | 1.44  | 0.49-13.25 | 0.88  | 0.12-16    | 0.7892 | 0.914365 |

### GENUS

| Bacterial group              | Day 0  |            | Day 7  |            | Day 21 |            | Day 42 |            | Day 0 vs Day 7 vs Day 21 vs Day 42 |          |
|------------------------------|--------|------------|--------|------------|--------|------------|--------|------------|------------------------------------|----------|
|                              | Median | Range      | Median | Range      | Median | Range      | Median | Range      | P value                            | Q value  |
| Bifidobacterium              | 0.08   | 0-0.19     | 0.07   | 0-0.21     | 0      | 0-0.58     | 0.06   | 0-0.38     | 0.8423                             | 0.912071 |
| Collinsella                  | 1.11   | 0.44-1.92  | 1.89   | 0.46-3.49  | 1.2    | 0.19-4.85  | 1.7    | 0-4        | 0.4153                             | 0.801504 |
| Slackia                      | 0.01   | 0-0.46     | 0      | 0-0.34     | 0      | 0-0.31     | 0.02   | 0-0.17     | 0.4531                             | 0.801504 |
| Bacteroides                  | 27.74  | 5.3-31.35  | 10.33  | 0.99-26.21 | 20.04  | 0.32-42.75 | 14.66  | 0.79-28.87 | 0.2561                             | 0.801504 |
| Prevotella                   | 0.61   | 0-9.45     | 0.12   | 0-17.75    | 0.11   | 0.07-0.45  | 0.12   | 0-4.01     | 0.1975                             | 0.79     |
| [Prevotella]                 | 1.86   | 0-8.66     | 0.45   | 0-17.2     | 0.14   | 0-5.88     | 0.2    | 0-3.82     | 0.3189                             | 0.801504 |
| Enterococcus                 | 0.25   | 0.2-10.11  | 0.27   | 0.22-0.37  | 0.26   | 0.2-1.99   | 0.29   | 0.18-1.17  | 0.7793                             | 0.912071 |
| Lactobacillus                | 0.1    | 0-0.41     | 0.18   | 0-0.34     | 0.07   | 0-10.16    | 0.15   | 0-21.28    | 0.5566                             | 0.801504 |
| Streptococcus                | 0.5    | 0.34-0.55  | 0.47   | 0.37-1.16  | 0.46   | 0.34-0.77  | 0.55   | 0.37-1.84  | 0.4153                             | 0.801504 |
| Turicibacter                 | 0.19   | 0-18.99    | 0.1    | 0-2.55     | 0.18   | 0-5.44     | 0.18   | 0-6.03     | 0.5566                             | 0.801504 |
| o__Clostridiales;f__g__      | 0.2    | 0-3.17     | 0.28   | 0-1.57     | 0.2    | 0-1.76     | 0.28   | 0-1.42     | 0.9651                             | 0.9651   |
| f__Clostridiaceae;__         | 7.8    | 1.98-22.59 | 13.62  | 4.34-34.39 | 16.32  | 2.71-36.4  | 15.05  | 4.65-30.94 | 0.1544                             | 0.79     |
| f__Clostridiaceae;g__        | 0.22   | 0-0.76     | 0.39   | 0.06-1.62  | 0.96   | 0-24.08    | 0.35   | 0-9.7      | 0.1628                             | 0.79     |
| Clostridium                  | 0      | 0-1.53     | 0.14   | 0-2.5      | 0.25   | 0-2.87     | 0.12   | 0-5        | 0.6766                             | 0.877243 |
| f__Lachnospiraceae;__        | 4.53   | 0.36-32.43 | 8.9    | 1.8-20.18  | 7.25   | 0.96-18.15 | 6.58   | 3.54-14.32 | 0.6823                             | 0.877243 |
| f__Lachnospiraceae;g__       | 1.44   | 0.42-6.46  | 2.05   | 0.51-3.19  | 1.32   | 0-2.93     | 1.51   | 0.18-2.05  | 0.4663                             | 0.801504 |
| Blautia                      | 5.92   | 0.42-11.12 | 7.14   | 1.78-14.71 | 4.8    | 1.68-11.43 | 6.03   | 2.28-9.89  | 0.3273                             | 0.801504 |
| Dorea                        | 0.12   | 0-1.33     | 0      | 0-0.38     | 0.06   | 0-0.75     | 0      | 0-1.01     | 0.9228                             | 0.949166 |
| [Ruminococcus]               | 3.18   | 0.88-7.3   | 8.24   | 1.77-14.84 | 3.62   | 1.96-8.34  | 8.53   | 2.81-15.7  | 0.0703                             | 0.79     |
| Peptococcus                  | 0      | 0-0        | 0      | 0-0.05     | 0.01   | 0-0.19     | 0      | 0-0.88     | 0.1299                             | 0.79     |
| f__Peptostreptococcaceae;g__ | 0.05   | 0-0.36     | 0      | 0-1.34     | 0.07   | 0-8.99     | 0      | 0-11.15    | 0.329                              | 0.801504 |

|                            |                   |            |                     |            |                   |            |                     |            |        |          |
|----------------------------|-------------------|------------|---------------------|------------|-------------------|------------|---------------------|------------|--------|----------|
| f__Ruminococcaceae;g__     | 0.6               | 0.06-1.55  | 0.91                | 0-1.93     | 0.62              | 0-1.64     | 0.44                | 0-1.28     | 0.2561 | 0.801504 |
| Faecalibacterium           | 1.09              | 0.12-9.69  | 1.75                | 0.33-9.31  | 1.71              | 0-5.93     | 1.05                | 0.14-9.44  | 0.8614 | 0.912071 |
| Ruminococcus               | 0                 | 0-0.18     | 0.02                | 0-0.37     | 0                 | 0-0.14     | 0.01                | 0-0.1      | 0.4668 | 0.801504 |
| Megamonas                  | 5.26 <sup>a</sup> | 0.58-15.36 | 3.39 <sup>a,b</sup> | 1.12-20.22 | 1.22 <sup>b</sup> | 0.32-13.44 | 1.68 <sup>a,b</sup> | 0.54-18.93 | 0.0239 | 0.79     |
| Phascolarctobacterium      | 0.43              | 0-1.59     | 0.35                | 0.05-3.58  | 0.24              | 0-1.63     | 0.18                | 0-1.23     | 0.3578 | 0.801504 |
| f__Erysipelotrichaceae;g__ | 0.24              | 0-3.93     | 0.29                | 0-0.87     | 0.05              | 0-2.23     | 0.1                 | 0-5.4      | 0.8145 | 0.912071 |
| Allobaculum                | 0.1               | 0-0.58     | 0.05                | 0-4.28     | 0.05              | 0-0.3      | 0.17                | 0-1.29     | 0.5363 | 0.801504 |
| Catenibacterium            | 0.31              | 0-1.57     | 0.22                | 0-1.19     | 0.05              | 0-0.19     | 0.12                | 0-1.35     | 0.5931 | 0.821215 |
| [Eubacterium]              | 0.22              | 0-2.33     | 0.52                | 0.1-1.35   | 0.17              | 0-0.66     | 0.29                | 0.03-1.24  | 0.1975 | 0.79     |
| Fusobacterium              | 13.51             | 5.21-32.62 | 11.39               | 2.26-30.43 | 13.09             | 2.15-26.04 | 13.06               | 3.24-29.49 | 0.5222 | 0.801504 |
| Sutterella                 | 1.9               | 0.18-5.18  | 0.97                | 0.18-6.08  | 0.81              | 0.28-7.44  | 0.41                | 0.28-1.96  | 0.0841 | 0.79     |
| Campylobacter              | 0.01              | 0-0.64     | 0                   | 0-0        | 0                 | 0-0.11     | 0                   | 0-1.46     | 0.1439 | 0.79     |
| Helicobacter               | 0.14              | 0-3.39     | 0.15                | 0-0.86     | 0.29              | 0.06-1.36  | 0.25                | 0-1.4      | 0.7951 | 0.912071 |
| f__Succinivibrionaceae;g__ | 0                 | 0-1.54     | 0.03                | 0-3.09     | 0.04              | 0-6.22     | 0.02                | 0-0.79     | 0.4914 | 0.801504 |
| f__Enterobacteriaceae;g__  | 0.75              | 0.51-5.62  | 0.9                 | 0.39-4.44  | 1.44              | 0.49-13.25 | 0.88                | 0.12-16    | 0.7892 | 0.912071 |

**SPECIES**

| Bacterial group              | Day 0  |            | Day 7  |            | Day 21 |            | Day 42 |           | Day 0 vs Day 7 vs Day 21 vs Day 42 |          |
|------------------------------|--------|------------|--------|------------|--------|------------|--------|-----------|------------------------------------|----------|
|                              | Median | Range      | Median | Range      | Median | Range      | Median | Range     | P value                            | Q value  |
| g__Bifidobacterium;s__       | 0.01   | 0-0.19     | 0      | 0-0.21     | 0      | 0-0.58     | 0.06   | 0-0.38    | 0.3194                             | 0.732653 |
| Collinsella stercoris        | 1.11   | 0.44-1.92  | 1.89   | 0.46-3.49  | 1.2    | 0.19-4.85  | 1.7    | 0-4       | 0.4153                             | 0.732653 |
| g__Slackia;s__               | 0.01   | 0-0.46     | 0      | 0-0.34     | 0      | 0-0.31     | 0.02   | 0-0.17    | 0.4531                             | 0.732653 |
| g__Bacteroides;__            | 9.41   | 2.34-23.44 | 4.65   | 0.51-13.72 | 9.74   | 0.23-28.67 | 6.49   | 0.2-18.78 | 0.5828                             | 0.732653 |
| g__Bacteroides;s__           | 7.11   | 1.75-16.5  | 3.22   | 0.27-18.35 | 4.58   | 0.08-19.6  | 3.28   | 0.4-14.01 | 0.1447                             | 0.68376  |
| Bacteroides plebeius         | 2.42   | 0.16-10.49 | 1.25   | 0-10.34    | 1.98   | 0-8.93     | 0.69   | 0-7.21    | 0.5856                             | 0.732653 |
| Prevotella copri             | 0.61   | 0-9.45     | 0.12   | 0-17.75    | 0.11   | 0.07-0.45  | 0.12   | 0-4.01    | 0.1975                             | 0.732653 |
| g__[Prevotella];s__          | 1.86   | 0-8.66     | 0.45   | 0-17.2     | 0.14   | 0-5.88     | 0.2    | 0-3.82    | 0.3189                             | 0.732653 |
| g__Enterococcus;s__          | 0.25   | 0.2-10.11  | 0.27   | 0.22-0.37  | 0.26   | 0.2-1.99   | 0.29   | 0.18-1.17 | 0.7793                             | 0.895849 |
| g__Lactobacillus;s__         | 0.1    | 0-0.41     | 0.18   | 0-0.34     | 0.07   | 0-10.16    | 0.15   | 0-21.28   | 0.5566                             | 0.732653 |
| g__Streptococcus;s__         | 0.5    | 0.34-0.55  | 0.47   | 0.37-1.16  | 0.46   | 0.34-0.77  | 0.55   | 0.37-1.84 | 0.4153                             | 0.732653 |
| g__Turicibacter;s__          | 0.19   | 0-18.99    | 0.1    | 0-2.55     | 0.18   | 0-5.44     | 0.18   | 0-6.03    | 0.5566                             | 0.732653 |
| o__Clostridiales;f__;g__;s__ | 0.2    | 0-3.17     | 0.28   | 0-1.57     | 0.2    | 0-1.76     | 0.28   | 0-1.42    | 0.9651                             | 0.9651   |

|                                  |                     |            |                     |            |                   |            |                     |            |        |          |
|----------------------------------|---------------------|------------|---------------------|------------|-------------------|------------|---------------------|------------|--------|----------|
| f__Clostridiaceae;__;__          | 7.8                 | 1.98-22.59 | 13.62               | 4.34-34.39 | 16.32             | 2.71-36.4  | 15.05               | 4.65-30.94 | 0.1544 | 0.68376  |
| f__Clostridiaceae;g__;s__        | 0.22                | 0-0.76     | 0.39                | 0.06-1.62  | 0.96              | 0-24.08    | 0.35                | 0-9.7      | 0.1628 | 0.68376  |
| Clostridium perfringens          | 0                   | 0-0.92     | 0                   | 0-2.5      | 0                 | 0-1.29     | 0.06                | 0-3.15     | 0.4402 | 0.732653 |
| f__Lachnospiraceae;__;__         | 4.53                | 0.36-32.43 | 8.9                 | 1.8-20.18  | 7.25              | 0.96-18.15 | 6.58                | 3.54-14.32 | 0.6823 | 0.81876  |
| f__Lachnospiraceae;g__;s__       | 1.44                | 0.42-6.46  | 2.05                | 0.51-3.19  | 1.32              | 0-2.93     | 1.51                | 0.18-2.05  | 0.4663 | 0.732653 |
| g__Blautia;s__                   | 2.04 <sup>a,b</sup> | 0-6.07     | 2.05 <sup>a</sup>   | 0.4-8.43   | 1.02 <sup>b</sup> | 0-3.76     | 1.08 <sup>a,b</sup> | 0.29-4.73  | 0.0239 | 0.4102   |
| Blautia producta                 | 3.73                | 0.42-8.17  | 5.24                | 1.32-8.07  | 3.3               | 1.33-7.66  | 4.66                | 1.83-7.63  | 0.4153 | 0.732653 |
| g__Dorea;s__                     | 0.12                | 0-1.33     | 0                   | 0-0.38     | 0.06              | 0-0.75     | 0                   | 0-1.01     | 0.9228 | 0.9651   |
| g__[Ruminococcus];__             | 0.22                | 0-2.2      | 0.03                | 0-6.97     | 0.03              | 0-1.02     | 0.01                | 0-9.8      | 0.3439 | 0.732653 |
| g__[Ruminococcus];s__            | 0.24                | 0-1.68     | 0.66                | 0.08-6.2   | 0.25              | 0-1.1      | 0.39                | 0-1.07     | 0.2344 | 0.732653 |
| [Ruminococcus] gnavus            | 2.42 <sup>a</sup>   | 0.79-5.61  | 4.48 <sup>a</sup>   | 1.4-13.25  | 3.23 <sup>a</sup> | 1.69-8.17  | 7.39 <sup>a</sup>   | 2.01-9.71  | 0.0471 | 0.49455  |
| g__Peptococcus;s__               | 0                   | 0-0        | 0                   | 0-0.05     | 0.01              | 0-0.19     | 0                   | 0-0.88     | 0.1299 | 0.68376  |
| f__Peptostreptococcaceae;g__;s__ | 0.05                | 0-0.36     | 0                   | 0-1.34     | 0.07              | 0-8.99     | 0                   | 0-11.15    | 0.329  | 0.732653 |
| f__Ruminococcaceae;g__;s__       | 0.6                 | 0.06-1.55  | 0.91                | 0-1.93     | 0.62              | 0-1.64     | 0.44                | 0-1.28     | 0.2561 | 0.732653 |
| Faecalibacterium prausnitzii     | 1.09                | 0.12-9.69  | 1.75                | 0.33-9.31  | 1.71              | 0-5.93     | 1.05                | 0.14-9.44  | 0.8614 | 0.927662 |
| g__Ruminococcus;s__              | 0                   | 0-0.18     | 0.02                | 0-0.37     | 0                 | 0-0.14     | 0.01                | 0-0.1      | 0.4668 | 0.732653 |
| g__Megamonas;s__                 | 5.26 <sup>a</sup>   | 0.58-15.36 | 3.39 <sup>a,b</sup> | 1.12-20.22 | 1.22 <sup>b</sup> | 0.32-13.44 | 1.68 <sup>a,b</sup> | 0.54-18.93 | 0.0239 | 0.4102   |
| g__Phascolarctobacterium;s__     | 0.43                | 0-1.59     | 0.35                | 0.05-3.58  | 0.24              | 0-1.63     | 0.18                | 0-1.23     | 0.3578 | 0.732653 |
| f__Erysipelotrichaceae;g__;s__   | 0.24                | 0-3.93     | 0.29                | 0-0.87     | 0.05              | 0-2.23     | 0.1                 | 0-5.4      | 0.8145 | 0.900237 |
| g__Allobaculum;s__               | 0.1                 | 0-0.58     | 0.05                | 0-4.28     | 0.05              | 0-0.3      | 0.17                | 0-1.29     | 0.5363 | 0.732653 |
| g__Catenibacterium;s__           | 0.31                | 0-1.57     | 0.22                | 0-1.19     | 0.05              | 0-0.19     | 0.12                | 0-1.35     | 0.5931 | 0.732653 |
| [Eubacterium] bifforme           | 0.12                | 0-2.33     | 0.07                | 0-1.07     | 0.06              | 0-0.27     | 0.08                | 0-1.2      | 0.4779 | 0.732653 |
| [Eubacterium] dolichum           | 0.06 <sup>a</sup>   | 0-0.27     | 0.28 <sup>a</sup>   | 0-1.02     | 0.05 <sup>a</sup> | 0-0.66     | 0.05 <sup>a</sup>   | 0-0.42     | 0.0293 | 0.4102   |
| g__Fusobacterium;s__             | 13.51               | 5.21-32.62 | 11.39               | 2.26-30.43 | 13.09             | 2.15-26.04 | 13.06               | 3.24-29.49 | 0.5222 | 0.732653 |
| g__Sutterella;s__                | 1.9                 | 0.18-5.18  | 0.97                | 0.18-6.08  | 0.81              | 0.28-7.44  | 0.41                | 0.28-1.96  | 0.0841 | 0.68376  |
| g__Campylobacter;s__             | 0.01                | 0-0.64     | 0                   | 0-0        | 0                 | 0-0.11     | 0                   | 0-1.46     | 0.1439 | 0.68376  |
| g__Helicobacter;s__              | 0.11                | 0-3.39     | 0.15                | 0-0.86     | 0.21              | 0-1.36     | 0.25                | 0-1.4      | 0.9484 | 0.9651   |
| f__Succinivibrionaceae;g__;s__   | 0                   | 0-1.54     | 0.03                | 0-3.09     | 0.04              | 0-6.22     | 0.02                | 0-0.79     | 0.4914 | 0.732653 |
| f__Enterobacteriaceae;g__;s__    | 0.75                | 0.51-5.62  | 0.9                 | 0.39-4.44  | 1.44              | 0.49-13.25 | 0.88                | 0.12-16    | 0.7892 | 0.895849 |
