# Supplementary material for: Effects of metronidazole on the fecal microbiome and metabolome in healthy dogs
Source: PubMed Central journal article supplement (PMC7517498; doi:10.1111/jvim.15871), 2020-08-28
Supplement: JVIM-34-1853-s003.pdf [file JVIM-34-1853-s003.pdf]

PHYLUM

| Bacterial group | Day 0              |            | Day 7              |             | Day 14              |             | Day 28              |             | Day 42              |             | Day 0 vs Day 7 vs Day 14 vs Day 28 vs Day 42 |          |
|-----------------|--------------------|------------|--------------------|-------------|---------------------|-------------|---------------------|-------------|---------------------|-------------|----------------------------------------------|----------|
|                 | Median             | Range      | Median             | Range       | Median              | Range       | Median              | Range       | Median              | Range       | P value                                      | Q value  |
| Actinobacteria  | 1.61 <sup>a</sup>  | 0.08-6.47  | 5.06 <sup>b</sup>  | 0.12-21.57  | 5.26 <sup>a,b</sup> | 0.08-17.31  | 1.32 <sup>a</sup>   | 0-25.45     | 2.48 <sup>a,b</sup> | 0-10.39     | 0.0053                                       | 0.006625 |
| Bacteroidetes   | 24.34 <sup>a</sup> | 0.89-48.6  | 0.73 <sup>b</sup>  | 0.24-11.36  | 0.81 <sup>b</sup>   | 0.29-13.01  | 15.43 <sup>a</sup>  | 0-63.69     | 9.02 <sup>a</sup>   | 0.39-31.14  | 0.0001                                       | 0.000167 |
| Firmicutes      | 55.88              | 25.94-76.6 | 59.52              | 27.34-82.93 | 60.56               | 18.43-83.6  | 56.4                | 14.18-93.09 | 67.26               | 45.41-94.22 | 0.1117                                       | 0.1117   |
| Fusobacteria    | 14.49 <sup>a</sup> | 3.24-29.49 | 0.62 <sup>b</sup>  | 0.17-0.92   | 0.69 <sup>b,c</sup> | 0.14-1.41   | 2.54 <sup>a,c</sup> | 0.38-29.66  | 1.8 <sup>b,c</sup>  | 0-21.56     | 0.0001                                       | 0.000167 |
| Proteobacteria  | 3.46 <sup>a</sup>  | 0.98-16.75 | 32.33 <sup>b</sup> | 9.13-68     | 29.27 <sup>b</sup>  | 10.59-75.99 | 9.3 <sup>a</sup>    | 0.84-47.21  | 5.91 <sup>a</sup>   | 0.75-21.13  | 0.0001                                       | 0.000167 |

CLASS

| Bacterial group       | Day 0               |             | Day 7               |             | Day 14               |             | Day 28              |             | Day 42               |             | Day 0 vs Day 7 vs Day 14 vs Day 28 vs Day 42 |          |
|-----------------------|---------------------|-------------|---------------------|-------------|----------------------|-------------|---------------------|-------------|----------------------|-------------|----------------------------------------------|----------|
|                       | Median              | Range       | Median              | Range       | Median               | Range       | Median              | Range       | Median               | Range       | P value                                      | Q value  |
| Actinobacteria        | 0.01 <sup>a</sup>   | 0-1.74      | 3.15 <sup>b</sup>   | 0-15.95     | 1.28 <sup>b,c</sup>  | 0-16.97     | 0.14 <sup>a,c</sup> | 0-12.12     | 0.2 <sup>a,b,c</sup> | 0-6.1       | 0.0001                                       | 0.000167 |
| Coriobacteriia        | 1.6                 | 0-4.73      | 2.32                | 0.12-11.33  | 1.44                 | 0-7.13      | 1.18                | 0-13.32     | 2.06                 | 0-5.43      | 0.5792                                       | 0.643556 |
| Bacteroidia           | 24.34 <sup>a</sup>  | 0.89-48.6   | 0.73 <sup>b</sup>   | 0.24-11.36  | 0.81 <sup>b</sup>    | 0.29-13.01  | 15.43 <sup>a</sup>  | 0-63.69     | 9.02 <sup>a</sup>    | 0.39-31.14  | 0.0001                                       | 0.000167 |
| Bacilli               | 1.45 <sup>a</sup>   | 0.57-24.12  | 42.82 <sup>b</sup>  | 12.35-75.92 | 29.35 <sup>b,c</sup> | 10.54-73.54 | 2.05 <sup>a</sup>   | 0.62-30.16  | 5.56 <sup>a,c</sup>  | 0.66-41.72  | 0.0001                                       | 0.000167 |
| Clostridia            | 47.47 <sup>a</sup>  | 25.06-67.27 | 8.89 <sup>b</sup>   | 4.84-48.02  | 22.91 <sup>b</sup>   | 2.55-39.87  | 49.3 <sup>a</sup>   | 13.06-89.18 | 57.55 <sup>a</sup>   | 27.83-84.91 | 0.0001                                       | 0.000167 |
| Erysipelotrichi       | 0.79 <sup>a,b</sup> | 0.03-7.05   | 0.27 <sup>a,b</sup> | 0-9.34      | 0.19 <sup>a</sup>    | 0-7.09      | 0.53 <sup>a,b</sup> | 0.16-5.99   | 1.3 <sup>b</sup>     | 0.2-8.3     | 0.0234                                       | 0.033429 |
| Fusobacteriia         | 14.49 <sup>a</sup>  | 3.24-29.49  | 0.62 <sup>b</sup>   | 0.17-0.92   | 0.69 <sup>b,c</sup>  | 0.14-1.41   | 2.54 <sup>a,c</sup> | 0.38-29.66  | 1.8 <sup>b,c</sup>   | 0-21.56     | 0.0001                                       | 0.000167 |
| Betaproteobacteria    | 0.96                | 0.12-4.37   | 0.71                | 0.21-12.58  | 0.73                 | 0.24-3.65   | 0.7                 | 0-9.94      | 0.64                 | 0.12-5.36   | 0.7541                                       | 0.7541   |
| Epsilonproteobacteria | 0.19                | 0-2.24      | 0.1                 | 0.02-0.31   | 0.11                 | 0-0.4       | 0.16                | 0-18.55     | 0.12                 | 0-1.42      | 0.0704                                       | 0.088    |
| Gammaproteobacteria   | 0.96 <sup>a</sup>   | 0-16.17     | 27.91 <sup>b</sup>  | 8.86-64.33  | 26.5 <sup>b</sup>    | 9.46-72.24  | 4.4 <sup>a</sup>    | 0.6-45.01   | 3 <sup>a</sup>       | 0.53-19.89  | 0.0001                                       | 0.000167 |

ORDER

| Bacterial group | Day 0  |       | Day 7  |       | Day 14 |       | Day 28 |       | Day 42 |       | Day 0 vs Day 7 vs Day 14 vs Day 28 vs Day 42 |         |
|-----------------|--------|-------|--------|-------|--------|-------|--------|-------|--------|-------|----------------------------------------------|---------|
|                 | Median | Range | Median | Range | Median | Range | Median | Range | Median | Range | P value                                      | Q value |

|                    |                     |             |                     |            |                     |            |                     |             |                    |             |        |          |
|--------------------|---------------------|-------------|---------------------|------------|---------------------|------------|---------------------|-------------|--------------------|-------------|--------|----------|
| Bifidobacteriales  | 0.01 <sup>a</sup>   | 0-1.74      | 2.93 <sup>b</sup>   | 0-15.95    | 1.15 <sup>a,b</sup> | 0-16.97    | 0.14 <sup>a,b</sup> | 0-12.12     | 0.2 <sup>a,b</sup> | 0-6.1       | 0.0002 | 0.000433 |
| Coriobacteriales   | 1.6                 | 0-4.73      | 2.32                | 0.12-11.33 | 1.44                | 0-7.13     | 1.18                | 0-13.32     | 2.06               | 0-5.43      | 0.5792 | 0.684509 |
| Bacteroidales      | 24.34 <sup>a</sup>  | 0.89-48.6   | 0.73 <sup>b</sup>   | 0.24-11.36 | 0.81 <sup>b</sup>   | 0.29-13.01 | 15.43 <sup>a</sup>  | 0-63.69     | 9.02 <sup>a</sup>  | 0.39-31.14  | 0.0001 | 0.00026  |
| Bacillales         | 0 <sup>a</sup>      | 0-0.55      | 0.28 <sup>a</sup>   | 0-7.36     | 0.04 <sup>a</sup>   | 0-3.93     | 0 <sup>a</sup>      | 0-0.16      | 0 <sup>a</sup>     | 0-1.07      | 0.0124 | 0.023029 |
| Lactobacillales    | 1.29 <sup>a</sup>   | 0.57-23.89  | 42.46 <sup>b</sup>  | 5.11-75.59 | 28.99 <sup>b</sup>  | 8.91-73.12 | 0.99 <sup>a</sup>   | 0.62-29.97  | 4.92 <sup>a</sup>  | 0.51-41.72  | 0.0001 | 0.00026  |
| Turicibacterales   | 0.1                 | 0-6.03      | 0.18                | 0-0.45     | 0.21                | 0-0.33     | 0.22                | 0-1.96      | 0.16               | 0-2.54      | 0.318  | 0.4134   |
| Clostridiales      | 47.47 <sup>a</sup>  | 25.06-67.27 | 8.89 <sup>b</sup>   | 4.84-48.02 | 22.91 <sup>b</sup>  | 2.55-39.87 | 49.3 <sup>a</sup>   | 13.06-89.18 | 57.55 <sup>a</sup> | 27.83-84.91 | 0.0001 | 0.00026  |
| Erysipelotrichales | 0.79 <sup>a,b</sup> | 0.03-7.05   | 0.27 <sup>a,b</sup> | 0-9.34     | 0.19 <sup>a</sup>   | 0-7.09     | 0.53 <sup>a,b</sup> | 0.16-5.99   | 1.3 <sup>b</sup>   | 0.2-8.3     | 0.0234 | 0.038025 |
| Fusobacteriales    | 14.49 <sup>a</sup>  | 3.24-29.49  | 0.62 <sup>b</sup>   | 0.17-0.92  | 0.69 <sup>b,c</sup> | 0.14-1.41  | 2.54 <sup>a,c</sup> | 0.38-29.66  | 1.8 <sup>b,c</sup> | 0-21.56     | 0.0001 | 0.00026  |
| Burkholderiales    | 0.96                | 0.12-4.37   | 0.71                | 0.21-12.58 | 0.73                | 0.24-3.65  | 0.7                 | 0-9.94      | 0.64               | 0.12-5.36   | 0.7541 | 0.7541   |
| Campylobacteriales | 0.19                | 0-2.24      | 0.1                 | 0.02-0.31  | 0.11                | 0-0.4      | 0.16                | 0-18.55     | 0.12               | 0-1.42      | 0.0704 | 0.101689 |
| Aeromonadales      | 0.07                | 0-3.13      | 0.08                | 0-2.31     | 0.06                | 0-1.67     | 0.09                | 0-6.6       | 0.08               | 0-2.17      | 0.7502 | 0.7541   |
| Enterobacteriales  | 0.68 <sup>a</sup>   | 0-16        | 27.81 <sup>b</sup>  | 8.76-64.25 | 26.44 <sup>b</sup>  | 9.41-72.15 | 2.12 <sup>a</sup>   | 0.04-44.9   | 1.97 <sup>a</sup>  | 0.45-19.83  | 0.0001 | 0.00026  |

**FAMILY**

| Bacterial group      | Day 0                |             | Day 7              |            | Day 14               |            | Day 28               |            | Day 42                |             | Day 0 vs Day 7 vs Day 14 vs Day 28 vs Day 42 |          |
|----------------------|----------------------|-------------|--------------------|------------|----------------------|------------|----------------------|------------|-----------------------|-------------|----------------------------------------------|----------|
|                      | Median               | Range       | Median             | Range      | Median               | Range      | Median               | Range      | Median                | Range       | P value                                      | Q value  |
| Bifidobacteriaceae   | 0.01 <sup>a</sup>    | 0-1.74      | 2.93 <sup>b</sup>  | 0-15.95    | 1.15 <sup>a,b</sup>  | 0-16.97    | 0.14 <sup>a,b</sup>  | 0-12.12    | 0.2 <sup>a,b</sup>    | 0-6.1       | 0.0002                                       | 0.000382 |
| Coriobacteriaceae    | 1.6                  | 0-4.73      | 2.32               | 0.12-11.33 | 1.44                 | 0-7.13     | 1.18                 | 0-13.32    | 2.06                  | 0-5.43      | 0.5792                                       | 0.640168 |
| Bacteroidaceae       | 20.62 <sup>a</sup>   | 0.79-48.42  | 0.6 <sup>b</sup>   | 0.22-4.43  | 0.66 <sup>b</sup>    | 0.29-12.75 | 15.37 <sup>a</sup>   | 0-63.18    | 8.36 <sup>a</sup>     | 0.39-31.1   | 0.0001                                       | 0.00021  |
| Prevotellaceae       | 0.18 <sup>a</sup>    | 0-7.34      | 0.08 <sup>b</sup>  | 0-10.45    | 0.06 <sup>b</sup>    | 0-9.76     | 0.18 <sup>a,b</sup>  | 0-0.24     | 0.16 <sup>a,b</sup>   | 0-5.85      | 0.0051                                       | 0.008238 |
| [Paraprevotellaceae] | 0.2 <sup>a</sup>     | 0-3.82      | 0.03 <sup>b</sup>  | 0-1.24     | 0.02 <sup>b</sup>    | 0-0.15     | 0.07 <sup>a,b</sup>  | 0-2.24     | 0.15 <sup>a,b</sup>   | 0-1.7       | 0.0015                                       | 0.002625 |
| Enterococcaceae      | 0.27 <sup>a</sup>    | 0-1.17      | 10.01 <sup>b</sup> | 0.98-49.33 | 6.9 <sup>b</sup>     | 0.95-27.36 | 0.34 <sup>a</sup>    | 0-3.85     | 0.31 <sup>a</sup>     | 0-15.09     | 0.0001                                       | 0.00021  |
| Lactobacillaceae     | 0.14                 | 0-21.28     | 0.27               | 0-59.74    | 0.23                 | 0-17.88    | 0.12                 | 0-4.23     | 0.12                  | 0-16.86     | 0.4982                                       | 0.581233 |
| Streptococcaceae     | 0.51 <sup>a</sup>    | 0.33-19.29  | 12.29 <sup>b</sup> | 0.47-58.66 | 19.97 <sup>b,d</sup> | 2.01-64.89 | 0.53 <sup>a,c</sup>  | 0-29.08    | 0.67 <sup>a,c,d</sup> | 0.42-41.4   | 0.0001                                       | 0.00021  |
| Turicibacteraceae    | 0.1                  | 0-6.03      | 0.18               | 0-0.45     | 0.21                 | 0-0.33     | 0.22                 | 0-1.96     | 0.16                  | 0-2.54      | 0.318                                        | 0.392824 |
| o__Clostridiales;f__ | 0.33 <sup>a,b</sup>  | 0-1.71      | 0 <sup>a</sup>     | 0-0.75     | 0 <sup>a</sup>       | 0-4.34     | 0.23 <sup>b</sup>    | 0-2.19     | 0.31 <sup>b</sup>     | 0-6.48      | 0.0001                                       | 0.00021  |
| Clostridiaceae       | 10.89                | 4.47-41.14  | 6.34               | 1.19-46.38 | 8.16                 | 1.35-32.85 | 13.05                | 2.19-29.95 | 9.36                  | 3.67-22.53  | 0.2532                                       | 0.332325 |
| Lachnospiraceae      | 19.91 <sup>a,d</sup> | 11.84-39.78 | 1.28 <sup>b</sup>  | 0.32-10    | 1.27 <sup>a,b</sup>  | 0-34.3     | 25.13 <sup>a,d</sup> | 8.42-85.45 | 29.85 <sup>d</sup>    | 12.19-63.22 | 0.0001                                       | 0.00021  |

|                       |                     |            |                     |            |                     |            |                     |            |                     |            |        |         |
|-----------------------|---------------------|------------|---------------------|------------|---------------------|------------|---------------------|------------|---------------------|------------|--------|---------|
| Peptostreptococcaceae | 0 <sup>a,b,c</sup>  | 0-11.15    | 0 <sup>a</sup>      | 0-0.1      | 0 <sup>a</sup>      | 0-14.85    | 0.22 <sup>b,c</sup> | 0-2.22     | 0.37 <sup>b</sup>   | 0-4.37     | 0.0001 | 0.00021 |
| Ruminococcaceae       | 2.05 <sup>a</sup>   | 0.27-11.26 | 0.12 <sup>b</sup>   | 0-0.53     | 0.14 <sup>b</sup>   | 0-4.48     | 0.36 <sup>a,b</sup> | 0.09-6.48  | 1.2 <sup>a</sup>    | 0.21-5.75  | 0.0001 | 0.00021 |
| Veillonellaceae       | 7.83 <sup>a</sup>   | 0.6-20.02  | 0.39 <sup>b,c</sup> | 0.22-0.98  | 0.41 <sup>b,c</sup> | 0.2-1.53   | 0.55 <sup>c,d</sup> | 0.23-26.11 | 1.51 <sup>a,d</sup> | 0.24-32.23 | 0.0001 | 0.00021 |
| Erysipelotrichaceae   | 0.79 <sup>a,b</sup> | 0.03-7.05  | 0.27 <sup>a,b</sup> | 0-9.34     | 0.19 <sup>a</sup>   | 0-7.09     | 0.53 <sup>a,b</sup> | 0.16-5.99  | 1.3 <sup>b</sup>    | 0.2-8.3    | 0.0234 | 0.0351  |
| Fusobacteriaceae      | 14.49 <sup>a</sup>  | 3.24-29.49 | 0.62 <sup>b</sup>   | 0.17-0.92  | 0.69 <sup>b,c</sup> | 0.14-1.41  | 2.54 <sup>a,c</sup> | 0.38-29.66 | 1.8 <sup>b,c</sup>  | 0-21.56    | 0.0001 | 0.00021 |
| Alcaligenaceae        | 0.96                | 0.12-4.37  | 0.71                | 0.21-12.58 | 0.73                | 0.24-3.65  | 0.7                 | 0-9.94     | 0.64                | 0.12-5.36  | 0.7541 | 0.7541  |
| Helicobacteraceae     | 0.14                | 0-1.49     | 0.1                 | 0-0.28     | 0.11                | 0-0.4      | 0.12                | 0-18.55    | 0.1                 | 0-1.42     | 0.053  | 0.0742  |
| Succinivibrionaceae   | 0.07                | 0-3.13     | 0.08                | 0-2.31     | 0.06                | 0-1.67     | 0.09                | 0-6.6      | 0.08                | 0-2.17     | 0.7502 | 0.7541  |
| Enterobacteriaceae    | 0.68 <sup>a</sup>   | 0-16       | 27.81 <sup>b</sup>  | 8.76-64.25 | 26.44 <sup>b</sup>  | 9.41-72.15 | 2.12 <sup>a</sup>   | 0.04-44.9  | 1.97 <sup>a</sup>   | 0.45-19.83 | 0.0001 | 0.00021 |

**GENUS**

| Bacterial group         | Day 0               |            | Day 7              |            | Day 14              |            | Day 28              |            | Day 42              |            | Day 0 vs Day 7 vs Day 14 vs Day 28 vs Day 42 |          |
|-------------------------|---------------------|------------|--------------------|------------|---------------------|------------|---------------------|------------|---------------------|------------|----------------------------------------------|----------|
|                         | Median              | Range      | Median             | Range      | Median              | Range      | Median              | Range      | Median              | Range      | P value                                      | Q value  |
| Bifidobacterium         | 0.01 <sup>a</sup>   | 0-1.74     | 2.93 <sup>b</sup>  | 0-15.95    | 1.15 <sup>a,b</sup> | 0-16.97    | 0.14 <sup>a,b</sup> | 0-12.12    | 0.2 <sup>a,b</sup>  | 0-6.1      | 0.0002                                       | 0.000412 |
| Collinsella             | 1.57                | 0-4.47     | 2.2                | 0.12-11.33 | 1.44                | 0-7.13     | 0.98                | 0-13.32    | 2.04                | 0-4.91     | 0.5594                                       | 0.575853 |
| Bacteroides             | 20.62 <sup>a</sup>  | 0.79-48.37 | 0.6 <sup>b</sup>   | 0.22-4.43  | 0.66 <sup>b</sup>   | 0.29-12.75 | 15.36 <sup>a</sup>  | 0-63.18    | 8.34 <sup>a</sup>   | 0.39-31.07 | 0.0001                                       | 0.00025  |
| Prevotella              | 0.18 <sup>a</sup>   | 0-7.34     | 0.08 <sup>b</sup>  | 0-10.45    | 0.06 <sup>b</sup>   | 0-9.76     | 0.18 <sup>a,b</sup> | 0-0.24     | 0.16 <sup>a,b</sup> | 0-5.85     | 0.0051                                       | 0.00714  |
| [Prevotella]            | 0.2 <sup>a</sup>    | 0-3.82     | 0.03 <sup>b</sup>  | 0-1.24     | 0.02 <sup>b</sup>   | 0-0.15     | 0.07 <sup>a,b</sup> | 0-2.24     | 0.15 <sup>a,b</sup> | 0-1.7      | 0.0015                                       | 0.002625 |
| Enterococcus            | 0.27 <sup>a</sup>   | 0-1.17     | 9.79 <sup>b</sup>  | 0.98-49.33 | 6.9 <sup>b</sup>    | 0.95-27.36 | 0.34 <sup>a</sup>   | 0-3.42     | 0.31 <sup>a</sup>   | 0-15.09    | 0.0001                                       | 0.00025  |
| Lactobacillus           | 0.14                | 0-21.28    | 0.27               | 0-59.74    | 0.23                | 0-17.88    | 0.12                | 0-4.23     | 0.12                | 0-16.86    | 0.4982                                       | 0.532    |
| Streptococcus           | 0.51 <sup>a</sup>   | 0.33-19.29 | 12.29 <sup>b</sup> | 0.47-58.66 | 19.97 <sup>b</sup>  | 2.01-64.89 | 0.52 <sup>a</sup>   | 0-29.08    | 0.67 <sup>a,b</sup> | 0.42-41.4  | 0.0001                                       | 0.00025  |
| Turicibacter            | 0.1                 | 0-6.03     | 0.18               | 0-0.45     | 0.21                | 0-0.33     | 0.22                | 0-1.96     | 0.16                | 0-2.54     | 0.318                                        | 0.371    |
| o__Clostridiales;f__g__ | 0.33 <sup>a,b</sup> | 0-1.71     | 0 <sup>a</sup>     | 0-0.75     | 0 <sup>a</sup>      | 0-4.34     | 0.23 <sup>b</sup>   | 0-2.19     | 0.31 <sup>b</sup>   | 0-6.48     | 0.0001                                       | 0.00025  |
| f__Clostridiaceae;__    | 10.48 <sup>a</sup>  | 4.28-30.94 | 1.09 <sup>b</sup>  | 0.37-13.05 | 3.74 <sup>b</sup>   | 0.24-18.69 | 6.19 <sup>a,b</sup> | 1.11-23.66 | 6.55 <sup>a,b</sup> | 1.08-21.53 | 0.0002                                       | 0.000412 |
| f__Clostridiaceae;g__   | 0.26 <sup>a</sup>   | 0-9.7      | 3.16 <sup>b</sup>  | 0.25-33.33 | 3.55 <sup>b</sup>   | 0.23-17.02 | 2.35 <sup>b</sup>   | 0-11.51    | 1.21 <sup>a,b</sup> | 0-5.28     | 0.002                                        | 0.003333 |
| Clostridium             | 0.12                | 0-5        | 0                  | 0-9.77     | 0                   | 0-6.45     | 0.5                 | 0-4.27     | 0.47                | 0-10.95    | 0.197                                        | 0.24625  |
| f__Lachnospiraceae;__   | 6 <sup>a</sup>      | 3.14-14.32 | 0.43 <sup>b</sup>  | 0-1.8      | 0.44 <sup>b</sup>   | 0-1.92     | 5.27 <sup>a</sup>   | 0.49-32.52 | 8.74 <sup>a</sup>   | 1.37-17.77 | 0.0001                                       | 0.00025  |
| f__Lachnospiraceae;g__  | 1.74 <sup>a</sup>   | 0.18-4.15  | 0 <sup>b</sup>     | 0-0.97     | 0 <sup>b</sup>      | 0-0.84     | 1.03 <sup>a</sup>   | 0.02-5.14  | 1.35 <sup>a</sup>   | 0-9.57     | 0.0001                                       | 0.00025  |
| Blautia                 | 6.64 <sup>a,b</sup> | 2.28-9.89  | 0.48 <sup>a</sup>  | 0.21-4.96  | 0.46 <sup>a</sup>   | 0-13.55    | 10.91 <sup>b</sup>  | 2.42-44.78 | 14.94 <sup>b</sup>  | 3.62-28.3  | 0.0001                                       | 0.00025  |

|                              |                       |            |                     |            |                     |            |                       |            |                     |            |        |          |
|------------------------------|-----------------------|------------|---------------------|------------|---------------------|------------|-----------------------|------------|---------------------|------------|--------|----------|
| Dorea                        | 0 <sup>a,b,c</sup>    | 0-1.01     | 0 <sup>a</sup>      | 0-0        | 0 <sup>a,c</sup>    | 0-0.13     | 0.77 <sup>b,c</sup>   | 0-7.66     | 0.64 <sup>b</sup>   | 0-8.35     | 0.0001 | 0.00025  |
| [Ruminococcus]               | 3.07 <sup>a,c</sup>   | 1.72-15.7  | 0.5 <sup>b</sup>    | 0-6.87     | 0.54 <sup>a,b</sup> | 0-25.2     | 4.89 <sup>a,b,c</sup> | 1.44-24.25 | 4.36 <sup>c</sup>   | 1.86-38.88 | 0.0003 | 0.000553 |
| f__Peptostreptococcaceae;g__ | 0 <sup>a,b</sup>      | 0-11.15    | 0 <sup>a</sup>      | 0-0.1      | 0 <sup>a,b</sup>    | 0-14.85    | 0.19 <sup>a,b</sup>   | 0-2.22     | 0.37 <sup>b</sup>   | 0-2.2      | 0.0001 | 0.00025  |
| f__Ruminococcaceae;g__       | 0.43 <sup>a</sup>     | 0-1.28     | 0 <sup>b</sup>      | 0-0.23     | 0 <sup>b</sup>      | 0-0.3      | 0.01 <sup>a,b</sup>   | 0-0.49     | 0.36 <sup>a</sup>   | 0-4.34     | 0.0001 | 0.00025  |
| Faecalibacterium             | 1.53 <sup>a</sup>     | 0-9.44     | 0.11 <sup>b</sup>   | 0-0.21     | 0.13 <sup>a,b</sup> | 0-4.07     | 0.16 <sup>a,b</sup>   | 0-5.96     | 0.2 <sup>a,b</sup>  | 0.11-4.91  | 0.0039 | 0.005935 |
| Oscillospira                 | 0 <sup>a</sup>        | 0-0.45     | 0 <sup>a</sup>      | 0-0        | 0 <sup>a</sup>      | 0-0.38     | 0 <sup>a</sup>        | 0-0.63     | 0.01 <sup>a</sup>   | 0-1.51     | 0.0023 | 0.003659 |
| Ruminococcus                 | 0.04                  | 0-0.1      | 0                   | 0-0.32     | 0                   | 0-0.86     | 0.01                  | 0-0.29     | 0.06                | 0-0.2      | 0.3758 | 0.42429  |
| Megamonas                    | 5.23 <sup>a</sup>     | 0.54-19.96 | 0.35 <sup>b</sup>   | 0.22-0.68  | 0.39 <sup>b</sup>   | 0.2-0.76   | 0.51 <sup>b,c</sup>   | 0.23-26.09 | 0.72 <sup>a,c</sup> | 0.24-31.84 | 0.0001 | 0.00025  |
| Phascolarctobacterium        | 0.04                  | 0-1.23     | 0                   | 0-0.25     | 0                   | 0-0.07     | 0                     | 0-0.61     | 0                   | 0-3.36     | 0.0654 | 0.084778 |
| f__Erysipelotrichaceae;g__   | 0.12 <sup>a,b,c</sup> | 0-5.4      | 0 <sup>a</sup>      | 0-0.4      | 0.01 <sup>a,c</sup> | 0-0.23     | 0.16 <sup>b,c</sup>   | 0-1.85     | 0.2 <sup>b</sup>    | 0-2.07     | 0.0002 | 0.000412 |
| Allobaculum                  | 0.09                  | 0-1.29     | 0                   | 0-3.31     | 0                   | 0-7.06     | 0                     | 0-2.21     | 0                   | 0-2.97     | 0.2596 | 0.31331  |
| Catenibacterium              | 0.16 <sup>a</sup>     | 0-2.39     | 0.07 <sup>a,b</sup> | 0-0.77     | 0 <sup>b</sup>      | 0-0.32     | 0 <sup>b</sup>        | 0-0.23     | 0 <sup>a,b</sup>    | 0-1.14     | 0.0003 | 0.000553 |
| [Eubacterium]                | 0.23 <sup>a,b</sup>   | 0-2.95     | 0.03 <sup>a</sup>   | 0-8.27     | 0.05 <sup>a,b</sup> | 0-5.36     | 0.2 <sup>a,b</sup>    | 0-4.42     | 0.66 <sup>b</sup>   | 0.06-4.5   | 0.0047 | 0.006854 |
| Fusobacterium                | 14.46 <sup>a,c</sup>  | 3.24-29.49 | 0.6 <sup>b</sup>    | 0.17-0.92  | 0.69 <sup>b,c</sup> | 0.14-1.2   | 1.02 <sup>c</sup>     | 0.38-29.66 | 1.2 <sup>b,c</sup>  | 0-21.56    | 0.0001 | 0.00025  |
| Sutterella                   | 0.96                  | 0.12-4.37  | 0.71                | 0.21-12.58 | 0.73                | 0.24-3.65  | 0.7                   | 0-9.94     | 0.64                | 0.12-5.36  | 0.7541 | 0.7541   |
| Helicobacter                 | 0.14                  | 0-1.49     | 0.1                 | 0-0.28     | 0.11                | 0-0.4      | 0.12                  | 0-18.55    | 0.09                | 0-1.42     | 0.0598 | 0.0805   |
| f__Succinivibrionaceae;g__   | 0.02                  | 0-0.79     | 0.06                | 0-2.31     | 0.06                | 0-1.46     | 0.07                  | 0-2.19     | 0.07                | 0-0.92     | 0.5016 | 0.532    |
| f__Enterobacteriaceae;g__    | 0.68 <sup>a</sup>     | 0-16       | 24.89 <sup>b</sup>  | 8.63-63.53 | 26.09 <sup>b</sup>  | 9.41-66.66 | 2.12 <sup>a</sup>     | 0-44.9     | 1.97 <sup>a</sup>   | 0.45-19.83 | 0.0001 | 0.00025  |
| Proteus                      | 0 <sup>a</sup>        | 0-0.03     | 0.09 <sup>a</sup>   | 0-8.04     | 0 <sup>a</sup>      | 0-5.84     | 0 <sup>a</sup>        | 0-3.31     | 0 <sup>a</sup>      | 0-0        | 0.0001 | 0.00025  |

**SPECIES**

| Bacterial group        | Day 0             |           | Day 7             |            | Day 14              |            | Day 28              |         | Day 42              |            | Day 0 vs Day 7 vs Day 14 vs Day 28 vs Day 42 |          |
|------------------------|-------------------|-----------|-------------------|------------|---------------------|------------|---------------------|---------|---------------------|------------|----------------------------------------------|----------|
|                        | Median            | Range     | Median            | Range      | Median              | Range      | Median              | Range   | Median              | Range      | P value                                      | Q value  |
| g__Bifidobacterium;s__ | 0.01 <sup>a</sup> | 0-1.74    | 0.15 <sup>a</sup> | 0-15.95    | 0.22 <sup>a</sup>   | 0-16.97    | 0 <sup>a</sup>      | 0-12.12 | 0.19 <sup>a</sup>   | 0-6.1      | 0.015                                        | 0.021207 |
| Collinsella stercoris  | 1.57              | 0-4       | 2.2               | 0.12-11.33 | 1.44                | 0-7.13     | 0.98                | 0-13.32 | 1.91                | 0-4.91     | 0.4786                                       | 0.516384 |
| g__Bacteroides;__      | 7.14 <sup>a</sup> | 0.2-26.84 | 0.3 <sup>b</sup>  | 0-0.59     | 0.3 <sup>b</sup>    | 0-1.85     | 0.56 <sup>b</sup>   | 0-12.71 | 0.64 <sup>a,b</sup> | 0-5.69     | 0.0001                                       | 0.000228 |
| g__Bacteroides;s__     | 5.67 <sup>a</sup> | 0.4-27.92 | 0.2 <sup>b</sup>  | 0-3.84     | 0.22 <sup>b</sup>   | 0.06-11.98 | 2.74 <sup>a</sup>   | 0-61.19 | 4.95 <sup>a</sup>   | 0.02-26.31 | 0.0001                                       | 0.000228 |
| Bacteroides plebeius   | 2.61 <sup>a</sup> | 0-8.39    | 0.11 <sup>b</sup> | 0-0.19     | 0.11 <sup>b,c</sup> | 0-0.34     | 0.29 <sup>a,c</sup> | 0-9.84  | 0.33 <sup>a,c</sup> | 0-11.6     | 0.0001                                       | 0.000228 |
| Prevotella copri       | 0.18 <sup>a</sup> | 0-7.34    | 0.08 <sup>b</sup> | 0-10.45    | 0.06 <sup>b</sup>   | 0-9.76     | 0.18 <sup>a</sup>   | 0-0.24  | 0.16 <sup>a</sup>   | 0-5.85     | 0.0051                                       | 0.007744 |

|                                  |                       |            |                     |            |                     |            |                     |            |                     |            |        |          |
|----------------------------------|-----------------------|------------|---------------------|------------|---------------------|------------|---------------------|------------|---------------------|------------|--------|----------|
| g__[Prevotella];s__              | 0.2 <sup>a</sup>      | 0-3.82     | 0.03 <sup>b</sup>   | 0-1.24     | 0.02 <sup>b</sup>   | 0-0.15     | 0.07 <sup>a,b</sup> | 0-2.24     | 0.15 <sup>a,b</sup> | 0-1.7      | 0.0015 | 0.002795 |
| g__Enterococcus;s__              | 0.27 <sup>a</sup>     | 0-1.17     | 9.79 <sup>b</sup>   | 0.98-49.03 | 6.13 <sup>b</sup>   | 0.95-26.58 | 0.34 <sup>a</sup>   | 0-3.42     | 0.31 <sup>a</sup>   | 0-15.09    | 0.0001 | 0.000228 |
| g__Lactobacillus;s__             | 0.14                  | 0-21.28    | 0.27                | 0-59.74    | 0.23                | 0-17.88    | 0.12                | 0-3.39     | 0.12                | 0-16.86    | 0.3983 | 0.441359 |
| g__Streptococcus;s__             | 0.51 <sup>a</sup>     | 0.33-19.29 | 12.29 <sup>b</sup>  | 0.47-58.58 | 19.97 <sup>b</sup>  | 2.01-64.83 | 0.52 <sup>a</sup>   | 0-29.08    | 0.67 <sup>a,b</sup> | 0.42-41.4  | 0.0001 | 0.000228 |
| g__Turicibacter;s__              | 0.1                   | 0-6.03     | 0.18                | 0-0.45     | 0.21                | 0-0.33     | 0.22                | 0-1.96     | 0.16                | 0-2.54     | 0.318  | 0.372514 |
| o__Clostridiales;f__;g__;s__     | 0.33 <sup>a,b</sup>   | 0-1.71     | 0 <sup>a</sup>      | 0-0.75     | 0 <sup>a</sup>      | 0-4.34     | 0.23 <sup>b</sup>   | 0-2.19     | 0.31 <sup>b</sup>   | 0-6.48     | 0.0001 | 0.000228 |
| f__Clostridiaceae;__;s__         | 10.48 <sup>a</sup>    | 4.28-30.94 | 1.09 <sup>b</sup>   | 0.37-13.05 | 3.74 <sup>b</sup>   | 0.24-18.69 | 6.19 <sup>a,b</sup> | 1.11-23.66 | 6.55 <sup>a,b</sup> | 1.08-21.53 | 0.0002 | 0.00041  |
| f__Clostridiaceae;g__;s__        | 0.26 <sup>a</sup>     | 0-9.7      | 3.16 <sup>b</sup>   | 0.25-33.33 | 3.55 <sup>b</sup>   | 0.23-17.02 | 2.35 <sup>b</sup>   | 0-11.51    | 1.21 <sup>a,b</sup> | 0-5.28     | 0.002  | 0.003565 |
| g__Clostridium;__                | 0                     | 0-1.85     | 0                   | 0-9.77     | 0                   | 0-2.15     | 0.2                 | 0-1.63     | 0                   | 0-10.95    | 0.1581 | 0.196427 |
| Clostridium perfringens          | 0.04 <sup>a</sup>     | 0-3.15     | 0 <sup>a</sup>      | 0-0        | 0 <sup>a</sup>      | 0-5.96     | 0 <sup>a</sup>      | 0-4.07     | 0.1 <sup>a</sup>    | 0-4.02     | 0.0056 | 0.0082   |
| f__Lachnospiraceae;__;s__        | 6 <sup>a</sup>        | 3.14-14.32 | 0.43 <sup>b</sup>   | 0-1.8      | 0.44 <sup>b</sup>   | 0-1.92     | 5.27 <sup>a</sup>   | 0.49-32.52 | 8.74 <sup>a</sup>   | 1.37-17.77 | 0.0001 | 0.000228 |
| f__Lachnospiraceae;g__;s__       | 1.74 <sup>a</sup>     | 0.18-4.15  | 0 <sup>b</sup>      | 0-0.97     | 0 <sup>b</sup>      | 0-0.84     | 1.03 <sup>a</sup>   | 0.02-5.14  | 1.35 <sup>a</sup>   | 0-9.57     | 0.0001 | 0.000228 |
| g__Blautia;s__                   | 1.43 <sup>a,c</sup>   | 0-4.73     | 0 <sup>b</sup>      | 0-0.99     | 0 <sup>b,c</sup>    | 0-4.27     | 1.77 <sup>a</sup>   | 0-16.39    | 6.06 <sup>a</sup>   | 0-14.48    | 0.0001 | 0.000228 |
| Blautia producta                 | 4.45 <sup>a,c</sup>   | 1.83-7.63  | 0.48 <sup>b</sup>   | 0-3.97     | 0.43 <sup>b,c</sup> | 0-13.1     | 5.79 <sup>a,c</sup> | 1.75-43.29 | 7.4 <sup>a</sup>    | 1.67-19.32 | 0.0001 | 0.000228 |
| g__Dorea;s__                     | 0 <sup>a,b,c</sup>    | 0-1.01     | 0 <sup>a</sup>      | 0-0        | 0 <sup>a,c</sup>    | 0-0.13     | 0.77 <sup>b,c</sup> | 0-7.66     | 0.64 <sup>b</sup>   | 0-8.35     | 0.0001 | 0.000228 |
| g__[Ruminococcus];s__            | 0.33 <sup>a</sup>     | 0-1.07     | 0 <sup>b</sup>      | 0-0.15     | 0 <sup>b</sup>      | 0-0.29     | 0.17 <sup>a,b</sup> | 0-14.85    | 0.71 <sup>a</sup>   | 0.1-35.78  | 0.0001 | 0.000228 |
| [Ruminococcus] gnavus            | 2.84 <sup>a</sup>     | 1.32-9.71  | 0.47 <sup>b</sup>   | 0-6.87     | 0.46 <sup>a,b</sup> | 0-25.2     | 3.83 <sup>a,b</sup> | 1.25-9.17  | 2.67 <sup>a,b</sup> | 1.5-14.79  | 0.0038 | 0.00615  |
| f__Peptostreptococcaceae;g__;s__ | 0 <sup>a,b</sup>      | 0-11.15    | 0 <sup>a</sup>      | 0-0.1      | 0 <sup>a,b</sup>    | 0-14.85    | 0.19 <sup>a,b</sup> | 0-2.22     | 0.37 <sup>b</sup>   | 0-2.2      | 0.0001 | 0.000228 |
| f__Ruminococcaceae;g__;s__       | 0.43 <sup>a</sup>     | 0-1.28     | 0 <sup>b</sup>      | 0-0.23     | 0 <sup>b</sup>      | 0-0.3      | 0.01 <sup>a,b</sup> | 0-0.49     | 0.36 <sup>a</sup>   | 0-4.34     | 0.0001 | 0.000228 |
| Faecalibacterium prausnitzii     | 1.53 <sup>a</sup>     | 0-9.44     | 0.11 <sup>b</sup>   | 0-0.21     | 0.13 <sup>a,b</sup> | 0-4.07     | 0.16 <sup>a,b</sup> | 0-5.96     | 0.2 <sup>a,b</sup>  | 0.11-4.91  | 0.0039 | 0.00615  |
| g__Oscillospira;s__              | 0 <sup>a</sup>        | 0-0.45     | 0 <sup>a</sup>      | 0-0        | 0 <sup>a</sup>      | 0-0.38     | 0 <sup>a</sup>      | 0-0.63     | 0.01 <sup>a</sup>   | 0-1.51     | 0.0023 | 0.003929 |
| g__Ruminococcus;s__              | 0.04                  | 0-0.1      | 0                   | 0-0.32     | 0                   | 0-0.86     | 0.01                | 0-0.29     | 0.06                | 0-0.2      | 0.3758 | 0.427994 |
| g__Megamonas;s__                 | 5.23 <sup>a</sup>     | 0.54-19.96 | 0.35 <sup>b</sup>   | 0.22-0.68  | 0.39 <sup>b</sup>   | 0.2-0.76   | 0.51 <sup>b,c</sup> | 0.23-26.09 | 0.72 <sup>a,c</sup> | 0.24-31.84 | 0.0001 | 0.000228 |
| g__Phascolarctobacterium;s__     | 0.04                  | 0-1.23     | 0                   | 0-0.25     | 0                   | 0-0.07     | 0                   | 0-0.61     | 0                   | 0-3.36     | 0.0654 | 0.083794 |
| f__Erysipelotrichaceae;g__;s__   | 0.12 <sup>a,b,c</sup> | 0-5.4      | 0 <sup>a</sup>      | 0-0.4      | 0.01 <sup>a,c</sup> | 0-0.23     | 0.16 <sup>b,c</sup> | 0-1.85     | 0.2 <sup>b</sup>    | 0-2.07     | 0.0002 | 0.00041  |
| g__Allobaculum;s__               | 0.09                  | 0-1.29     | 0                   | 0-3.31     | 0                   | 0-7.06     | 0                   | 0-2.21     | 0                   | 0-2.97     | 0.2596 | 0.313047 |
| g__Catenibacterium;s__           | 0.16 <sup>a</sup>     | 0-2.39     | 0.07 <sup>a,b</sup> | 0-0.77     | 0 <sup>b</sup>      | 0-0.32     | 0 <sup>b</sup>      | 0-0.23     | 0 <sup>a,b</sup>    | 0-1.14     | 0.0003 | 0.000586 |
| [Eubacterium] bifforme           | 0.08                  | 0-2.95     | 0.03                | 0-8.04     | 0.03                | 0-5.27     | 0.07                | 0-4.37     | 0.15                | 0-4.15     | 0.6562 | 0.672605 |
| [Eubacterium] dolichum           | 0.05 <sup>a</sup>     | 0-0.42     | 0 <sup>a</sup>      | 0-0.44     | 0 <sup>a</sup>      | 0-1.06     | 0.08 <sup>a</sup>   | 0-2.32     | 0.08 <sup>a</sup>   | 0-2.59     | 0.027  | 0.0369   |
| g__Fusobacterium;s__             | 14.46 <sup>a</sup>    | 3.24-29.49 | 0.6 <sup>b</sup>    | 0.17-0.92  | 0.69 <sup>b,c</sup> | 0.14-1.2   | 1.02 <sup>a,c</sup> | 0.38-29.66 | 1.2 <sup>b,c</sup>  | 0-21.56    | 0.0001 | 0.000228 |
| g__Sutterella;s__                | 0.96                  | 0.12-4.37  | 0.71                | 0.21-12.58 | 0.73                | 0.24-3.65  | 0.7                 | 0-9.94     | 0.64                | 0.12-5.36  | 0.7541 | 0.7541   |

|                                |                   |        |                    |            |                    |            |                   |         |                   |            |        |          |
|--------------------------------|-------------------|--------|--------------------|------------|--------------------|------------|-------------------|---------|-------------------|------------|--------|----------|
| g__Helicobacter;s__            | 0.14              | 0-1.4  | 0.1                | 0-0.28     | 0.1                | 0-0.4      | 0.12              | 0-18.55 | 0.09              | 0-0.95     | 0.0573 | 0.075784 |
| f__Succinivibrionaceae;g__;s__ | 0.02              | 0-0.79 | 0.06               | 0-2.31     | 0.06               | 0-1.46     | 0.07              | 0-2.19  | 0.07              | 0-0.92     | 0.5016 | 0.527323 |
| f__Enterobacteriaceae;g__;s__  | 0.68 <sup>a</sup> | 0-16   | 24.89 <sup>b</sup> | 8.63-63.53 | 26.09 <sup>b</sup> | 9.41-66.66 | 2.12 <sup>a</sup> | 0-44.9  | 1.97 <sup>a</sup> | 0.45-19.83 | 0.0001 | 0.000228 |
| g__Proteus;s__                 | 0 <sup>a</sup>    | 0-0.03 | 0.09 <sup>a</sup>  | 0-8.04     | 0 <sup>a</sup>     | 0-5.84     | 0 <sup>a</sup>    | 0-3.31  | 0 <sup>a</sup>    | 0-0        | 0.0001 | 0.000228 |
