# Supplementary material for: Effects of metronidazole on the fecal microbiome and metabolome in healthy dogs
Source: PubMed Central journal article supplement (PMC7517498; doi:10.1111/jvim.15871), 2020-08-28
Supplement: JVIM-34-1853-s004.pdf [file JVIM-34-1853-s004.pdf]

**Group 1 Summary Statistics for fecal metabolomics**

| Compound name          | day 0  |                    | day 7  |                    | day 21 |                    | day 42 |                    | p-value | q-value |
|------------------------|--------|--------------------|--------|--------------------|--------|--------------------|--------|--------------------|---------|---------|
|                        | mean   | standard deviation | mean   | standard deviation | mean   | standard deviation | mean   | standard deviation |         |         |
| xylulose NIST          | 10229  | 8625               | 12696  | 16420              | 8960   | 6103               | 7817   | 5730               | 0.7482  | 0.9428  |
| xylose                 | 519348 | 565805             | 686314 | 744163             | 468380 | 433454             | 427240 | 349741             | 0.6829  | 0.9428  |
| xylitol                | 841    | 631                | 1016   | 729                | 1141   | 1535               | 612    | 321                | 0.6740  | 0.9428  |
| xanthosine             | 369    | 110                | 276    | 82                 | 340    | 150                | 273    | 124                | 0.3331  | 0.9428  |
| xanthine               | 5237   | 4569               | 5983   | 4423               | 4233   | 2455               | 5703   | 3264               | 0.8122  | 0.9635  |
| vanillic acid          | 856    | 929                | 471    | 293                | 931    | 1164               | 909    | 1064               | 0.6989  | 0.9428  |
| valine                 | 159705 | 103419             | 146034 | 71601              | 161353 | 98885              | 160134 | 120477             | 0.9912  | 0.9995  |
| urocanic acid          | 865    | 197                | 1156   | 831                | 929    | 503                | 1104   | 747                | 0.7870  | 0.9614  |
| uridine                | 1585   | 831                | 1501   | 1625               | 958    | 148                | 701    | 230                | 0.2074  | 0.9428  |
| uric acid              | 2166   | 2725               | 890    | 503                | 1631   | 1049               | 1509   | 2466               | 0.5577  | 0.9428  |
| urea                   | 2068   | 764                | 1689   | 262                | 2145   | 1145               | 1472   | 639                | 0.1821  | 0.9428  |
| uracil                 | 38645  | 30040              | 30424  | 14932              | 33940  | 18392              | 35762  | 26901              | 0.8537  | 0.9672  |
| UDP-glucuronic acid    | 1005   | 573                | 717    | 313                | 759    | 489                | 852    | 551                | 0.6621  | 0.9428  |
| tyrosine               | 126202 | 58890              | 165056 | 93366              | 144885 | 65405              | 140853 | 69020              | 0.7645  | 0.9501  |
| tyramine               | 50482  | 45995              | 93705  | 68601              | 33083  | 30670              | 125948 | 91296              | 0.0331  | 0.9264  |
| tryptophan             | 33782  | 22775              | 32433  | 25037              | 21353  | 14436              | 33259  | 20328              | 0.5433  | 0.9428  |
| trehalose              | 2742   | 3679               | 1359   | 1567               | 14734  | 36271              | 1886   | 2118               | 0.4171  | 0.9428  |
| trans-4-hydroxyproline | 9604   | 5711               | 10483  | 7774               | 8927   | 6304               | 12740  | 7386               | 0.6117  | 0.9428  |
| thymine                | 12237  | 5002               | 9754   | 3396               | 12507  | 7519               | 11199  | 7395               | 0.7719  | 0.9538  |
| thymidine              | 1765   | 1900               | 1336   | 1115               | 1108   | 808                | 1018   | 554                | 0.2032  | 0.9428  |
| threonine              | 18736  | 7075               | 18993  | 5147               | 19801  | 15280              | 17094  | 7593               | 0.9546  | 0.9995  |
| threonic acid          | 308    | 121                | 238    | 53                 | 279    | 87                 | 295    | 106                | 0.3963  | 0.9428  |
| threitol               | 1364   | 1251               | 1035   | 814                | 1322   | 1078               | 954    | 870                | 0.5133  | 0.9428  |
| taurine                | 174133 | 481842             | 7220   | 11390              | 7648   | 17133              | 4268   | 7135               | 0.4305  | 0.9428  |
| tagatose               | 978    | 451                | 653    | 284                | 575    | 243                | 688    | 384                | 0.1332  | 0.9428  |
| sucrose                | 165    | 111                | 187    | 154                | 179    | 94                 | 213    | 127                | 0.8689  | 0.9672  |
| stearic acid           | 127158 | 92223              | 90116  | 30147              | 104815 | 28562              | 93973  | 58136              | 0.6484  | 0.9428  |
| spermidine             | 7218   | 4252               | 6155   | 3673               | 6635   | 4245               | 8453   | 5435               | 0.6298  | 0.9428  |
| sinapinic acid         | 633    | 602                | 1109   | 1284               | 860    | 1108               | 1004   | 1177               | 0.4942  | 0.9428  |

|                                      |        |        |        |        |        |       |        |        |        |        |
|--------------------------------------|--------|--------|--------|--------|--------|-------|--------|--------|--------|--------|
| shikimic acid                        | 1976   | 1257   | 1793   | 1177   | 1238   | 587   | 1692   | 1281   | 0.4499 | 0.9428 |
| serine                               | 27195  | 13269  | 28196  | 12098  | 30222  | 17555 | 19685  | 8243   | 0.4533 | 0.9428 |
| sebacic acid, di(2-octyl) ester NIST | 410    | 196    | 418    | 290    | 507    | 294   | 332    | 240    | 0.6331 | 0.9428 |
| salicylaldehyde                      | 2212   | 1768   | 1215   | 979    | 2571   | 2331  | 2532   | 2724   | 0.5029 | 0.9428 |
| ribose                               | 102968 | 79391  | 88530  | 25749  | 91562  | 58778 | 97056  | 67867  | 0.9578 | 0.9995 |
| ribonic acid                         | 325    | 111    | 598    | 801    | 353    | 74    | 325    | 135    | 0.4950 | 0.9428 |
| ribitol                              | 2913   | 1470   | 2470   | 1599   | 2067   | 1357  | 3333   | 2717   | 0.2919 | 0.9428 |
| raffinose                            | 325    | 171    | 281    | 143    | 242    | 56    | 228    | 144    | 0.3793 | 0.9428 |
| pyruvic acid                         | 2305   | 852    | 3583   | 2877   | 5116   | 8604  | 1809   | 1033   | 0.5276 | 0.9428 |
| putrescine                           | 179900 | 192610 | 183889 | 126252 | 148638 | 50232 | 190884 | 116914 | 0.8179 | 0.9635 |
| pseudo uridine                       | 2103   | 1434   | 1993   | 1016   | 1655   | 534   | 1732   | 1354   | 0.8488 | 0.9672 |
| propane-1,3-diol NIST                | 763    | 360    | 1376   | 855    | 1800   | 1650  | 3279   | 4033   | 0.1670 | 0.9428 |
| proline                              | 92340  | 77442  | 63039  | 27244  | 66223  | 47124 | 64292  | 46462  | 0.6972 | 0.9428 |
| piperidone                           | 67360  | 39626  | 91903  | 63089  | 90299  | 76165 | 100408 | 53224  | 0.6001 | 0.9428 |
| pipecolic acid                       | 25179  | 30712  | 11240  | 7972   | 20419  | 16844 | 11790  | 6634   | 0.3639 | 0.9428 |
| pinitol                              | 330    | 120    | 312    | 239    | 277    | 76    | 15538  | 42757  | 0.4057 | 0.9428 |
| pimelic acid                         | 809    | 1067   | 388    | 140    | 491    | 317   | 407    | 139    | 0.3643 | 0.9428 |
| phosphate                            | 1137   | 762    | 1317   | 305    | 4661   | 6537  | 1622   | 1215   | 0.1419 | 0.9428 |
| phenylpyruvate                       | 726    | 388    | 621    | 305    | 796    | 540   | 764    | 545    | 0.8772 | 0.9672 |
| phenylethylamine                     | 3502   | 3565   | 5629   | 5452   | 4459   | 5527  | 6995   | 10654  | 0.3367 | 0.9428 |
| phenylalanine                        | 67595  | 24686  | 89396  | 30649  | 92735  | 41312 | 90111  | 56993  | 0.6165 | 0.9428 |
| phenylacetic acid                    | 26610  | 34077  | 15701  | 18560  | 20166  | 20455 | 5380   | 4924   | 0.2433 | 0.9428 |
| phenol                               | 2946   | 2459   | 1910   | 1093   | 3335   | 1788  | 3363   | 3371   | 0.5127 | 0.9428 |
| pentitol                             | 303    | 141    | 248    | 81     | 246    | 34    | 230    | 98     | 0.4810 | 0.9428 |
| pentadecanoic acid                   | 2891   | 1252   | 3036   | 1311   | 6235   | 8281  | 4229   | 2498   | 0.3963 | 0.9428 |
| parabanic acid NIST                  | 1713   | 1249   | 1600   | 1203   | 2097   | 1734  | 2280   | 2567   | 0.8291 | 0.9635 |
| pantothenic acid                     | 2537   | 2662   | 2189   | 1150   | 1401   | 649   | 1940   | 1163   | 0.5675 | 0.9428 |
| palmitic acid                        | 26918  | 13354  | 25094  | 9889   | 24877  | 5491  | 28577  | 22660  | 0.9535 | 0.9995 |
| oxoproline                           | 32601  | 23173  | 32332  | 21177  | 31802  | 15100 | 32911  | 14428  | 0.9995 | 0.9995 |
| ornithine                            | 21765  | 16935  | 26683  | 13938  | 21152  | 16116 | 29688  | 28998  | 0.6170 | 0.9428 |
| oleic acid                           | 1198   | 2429   | 623    | 1110   | 735    | 1436  | 264    | 171    | 0.6441 | 0.9428 |
| octadecanol                          | 502    | 212    | 370    | 146    | 386    | 139   | 384    | 230    | 0.5381 | 0.9428 |
| O-acetyls erine                      | 806    | 402    | 829    | 243    | 1045   | 446   | 969    | 541    | 0.5792 | 0.9428 |
| norvaline                            | 3145   | 1947   | 5389   | 6491   | 2910   | 1032  | 5269   | 3999   | 0.4367 | 0.9428 |

|                                   |        |        |        |       |        |        |        |        |        |        |
|-----------------------------------|--------|--------|--------|-------|--------|--------|--------|--------|--------|--------|
| N-methylalanine                   | 76989  | 40075  | 68426  | 34704 | 55930  | 27434  | 78275  | 54763  | 0.7414 | 0.9428 |
| nicotinic acid                    | 18588  | 7464   | 18499  | 8592  | 15924  | 9402   | 17678  | 10030  | 0.8737 | 0.9672 |
| nicotianamine                     | 341    | 98     | 259    | 45    | 249    | 59     | 355    | 208    | 0.1460 | 0.9428 |
| N-acetylputrescine                | 2169   | 2068   | 3272   | 1758  | 2271   | 1471   | 1622   | 483    | 0.1778 | 0.9428 |
| N-acetylorcarnithine              | 2604   | 2014   | 3018   | 2257  | 2227   | 1814   | 2076   | 2163   | 0.4252 | 0.9428 |
| N-acetyl-D-mannosamine            | 7764   | 6421   | 2400   | 1412  | 3147   | 2425   | 2747   | 1742   | 0.0082 | 0.9264 |
| N-acetyl-D-hexosamine             | 946    | 314    | 759    | 197   | 1071   | 505    | 868    | 229    | 0.2668 | 0.9428 |
| N-acetyl-D-galactosamine          | 21475  | 14963  | 9644   | 4116  | 12798  | 9240   | 11027  | 7365   | 0.0184 | 0.9264 |
| myristic acid                     | 7592   | 4766   | 9429   | 6479  | 9154   | 6657   | 8337   | 4428   | 0.9128 | 0.9911 |
| myo-inositol                      | 1259   | 681    | 1276   | 1180  | 1312   | 815    | 1320   | 900    | 0.9978 | 0.9995 |
| montanic acid                     | 1009   | 484    | 1029   | 725   | 842    | 283    | 599    | 206    | 0.2329 | 0.9428 |
| methyltetrahydrophenanthrene NIST | 1761   | 701    | 1562   | 560   | 1661   | 728    | 1650   | 1010   | 0.9692 | 0.9995 |
| methyl O-D-galactopyranoside      | 1941   | 863    | 1374   | 903   | 1271   | 629    | 1310   | 1148   | 0.4903 | 0.9428 |
| methionine sulfoxide              | 5166   | 3316   | 7046   | 6416  | 4874   | 2710   | 6279   | 3764   | 0.6976 | 0.9428 |
| methionine                        | 22859  | 10512  | 20344  | 12691 | 19667  | 17855  | 16323  | 9965   | 0.8153 | 0.9635 |
| methanolphosphate                 | 2088   | 1912   | 1904   | 1163  | 2748   | 2151   | 2640   | 1635   | 0.7444 | 0.9428 |
| melezitose                        | 259    | 79     | 176    | 69    | 257    | 77     | 236    | 142    | 0.2077 | 0.9428 |
| maltotriose                       | 405    | 231    | 223    | 58    | 234    | 83     | 242    | 172    | 0.0141 | 0.9264 |
| maltose                           | 11746  | 17666  | 5185   | 7351  | 13183  | 14719  | 5339   | 8717   | 0.2223 | 0.9428 |
| maltitol                          | 407    | 435    | 454    | 302   | 313    | 69     | 355    | 172    | 0.6138 | 0.9428 |
| malonic acid                      | 308    | 72     | 230    | 51    | 244    | 121    | 218    | 102    | 0.2938 | 0.9428 |
| malic acid                        | 2475   | 2529   | 791    | 485   | 870    | 593    | 801    | 447    | 0.0413 | 0.9428 |
| maleimide                         | 2521   | 1806   | 2039   | 906   | 2288   | 1780   | 1840   | 1172   | 0.7398 | 0.9428 |
| maleic acid                       | 381    | 159    | 283    | 54    | 299    | 109    | 305    | 82     | 0.2709 | 0.9428 |
| lyxose                            | 24886  | 25628  | 40091  | 50226 | 28884  | 24512  | 24196  | 22346  | 0.6729 | 0.9428 |
| lyxitol                           | 3491   | 1982   | 3242   | 1187  | 2961   | 1592   | 3727   | 1965   | 0.6504 | 0.9428 |
| lysine                            | 103995 | 66856  | 170424 | 95519 | 120296 | 72168  | 151174 | 94167  | 0.2193 | 0.9428 |
| lithocholic acid                  | 1265   | 1576   | 429    | 498   | 572    | 347    | 311    | 110    | 0.0916 | 0.9428 |
| linoleic acid                     | 499    | 297    | 210    | 135   | 374    | 133    | 309    | 155    | 0.0345 | 0.9264 |
| lignoceric acid                   | 1127   | 1652   | 377    | 117   | 492    | 186    | 421    | 223    | 0.2709 | 0.9428 |
| levoglucosan                      | 1212   | 1855   | 966    | 520   | 3797   | 7279   | 540    | 526    | 0.3350 | 0.9428 |
| leucine                           | 177712 | 100242 | 156714 | 73518 | 173395 | 115710 | 193535 | 166723 | 0.9512 | 0.9995 |
| lactulose                         | 1929   | 2226   | 997    | 1108  | 6095   | 14685  | 4635   | 6662   | 0.4860 | 0.9428 |
| lactose                           | 656    | 235    | 595    | 397   | 1330   | 2086   | 728    | 558    | 0.5372 | 0.9428 |

|                          |        |       |        |        |        |       |        |        |        |        |
|--------------------------|--------|-------|--------|--------|--------|-------|--------|--------|--------|--------|
| lactitol                 | 2105   | 2100  | 1854   | 2080   | 2356   | 4311  | 1528   | 1719   | 0.7543 | 0.9428 |
| kynurenic acid           | 748    | 856   | 576    | 437    | 601    | 330   | 851    | 796    | 0.8095 | 0.9635 |
| isothreonic acid         | 817    | 713   | 577    | 464    | 534    | 354   | 476    | 300    | 0.3025 | 0.9428 |
| isomaltose               | 340    | 166   | 308    | 143    | 357    | 93    | 382    | 197    | 0.8247 | 0.9635 |
| isoleucine               | 112902 | 74377 | 106802 | 66009  | 112555 | 79825 | 115924 | 107106 | 0.9976 | 0.9995 |
| inosine                  | 1742   | 1416  | 1340   | 1363   | 1048   | 863   | 941    | 688    | 0.1227 | 0.9428 |
| indole-3-lactate         | 36628  | 43270 | 28203  | 21767  | 38447  | 24615 | 28221  | 18450  | 0.6932 | 0.9428 |
| indole-3-acetate         | 3177   | 2357  | 4827   | 4767   | 3556   | 1635  | 2727   | 1491   | 0.5593 | 0.9428 |
| hypoxanthine             | 9338   | 7976  | 11213  | 5060   | 8270   | 5442  | 8708   | 3909   | 0.7438 | 0.9428 |
| hydroxylamine            | 68439  | 53236 | 49739  | 26496  | 75414  | 46870 | 61993  | 33508  | 0.6377 | 0.9428 |
| hydroxycarbamate NIST    | 13621  | 10542 | 12226  | 6265   | 17769  | 13152 | 14689  | 7147   | 0.6433 | 0.9428 |
| homoserine               | 1630   | 708   | 1303   | 692    | 1376   | 545   | 1694   | 718    | 0.3097 | 0.9428 |
| homocystine              | 520    | 170   | 383    | 95     | 496    | 189   | 405    | 135    | 0.0746 | 0.9428 |
| histidine                | 8347   | 5229  | 14688  | 7154   | 9271   | 5340  | 12099  | 7294   | 0.1155 | 0.9428 |
| hexuronic acid           | 9356   | 20235 | 1394   | 820    | 1521   | 1031  | 3052   | 3844   | 0.4126 | 0.9428 |
| hexonic acid             | 473    | 279   | 601    | 273    | 632    | 298   | 561    | 324    | 0.6900 | 0.9428 |
| hexitol                  | 434    | 119   | 461    | 138    | 389    | 63    | 470    | 337    | 0.8631 | 0.9672 |
| heptadecanoic acid       | 2317   | 1871  | 1413   | 687    | 1757   | 641   | 1406   | 525    | 0.2286 | 0.9428 |
| guanosine                | 752    | 530   | 532    | 304    | 529    | 358   | 337    | 129    | 0.0168 | 0.9264 |
| guanine                  | 924    | 546   | 620    | 264    | 672    | 323   | 452    | 201    | 0.0269 | 0.9264 |
| glycyl tyrosine          | 702    | 380   | 717    | 508    | 640    | 339   | 637    | 245    | 0.9122 | 0.9911 |
| glycyl proline           | 7418   | 4598  | 11296  | 8275   | 6552   | 4576  | 9411   | 4876   | 0.1903 | 0.9428 |
| glycolic acid            | 17476  | 22983 | 9168   | 3716   | 9857   | 5164  | 8054   | 4369   | 0.3588 | 0.9428 |
| glycine                  | 42585  | 20268 | 34150  | 15764  | 37376  | 25181 | 38338  | 18311  | 0.8876 | 0.9736 |
| glycerol-alpha-phosphate | 773    | 688   | 625    | 563    | 622    | 389   | 553    | 366    | 0.8232 | 0.9635 |
| glycerol-3-galactoside   | 868    | 539   | 488    | 301    | 604    | 364   | 687    | 420    | 0.1943 | 0.9428 |
| glycerol                 | 35384  | 14010 | 34478  | 14701  | 33070  | 23383 | 28313  | 12605  | 0.7373 | 0.9428 |
| glyceric acid            | 5198   | 2218  | 4427   | 2197   | 5414   | 2442  | 2558   | 1397   | 0.0466 | 0.9428 |
| glutaric acid            | 889    | 749   | 653    | 515    | 660    | 426   | 586    | 220    | 0.6524 | 0.9428 |
| glutamine                | 9339   | 6942  | 11527  | 11686  | 11122  | 11512 | 11292  | 5212   | 0.9592 | 0.9995 |
| glutamic acid            | 74209  | 55271 | 100506 | 103526 | 66989  | 49567 | 66248  | 16726  | 0.6979 | 0.9428 |
| glucose-1-phosphate      | 1057   | 348   | 1500   | 745    | 1095   | 505   | 980    | 406    | 0.2203 | 0.9428 |
| glucose                  | 50824  | 30088 | 36671  | 25021  | 41010  | 29128 | 53550  | 50394  | 0.6408 | 0.9428 |
| glucoheptulose           | 1093   | 654   | 607    | 205    | 748    | 680   | 609    | 456    | 0.1479 | 0.9428 |

|                         |        |        |       |       |       |       |       |       |        |        |
|-------------------------|--------|--------|-------|-------|-------|-------|-------|-------|--------|--------|
| galacturonic acid       | 4267   | 4692   | 1354  | 1275  | 918   | 619   | 1071  | 1073  | 0.0314 | 0.9264 |
| galactitol              | 1677   | 1636   | 657   | 259   | 621   | 228   | 673   | 524   | 0.0585 | 0.9428 |
| galactinol              | 659    | 761    | 408   | 202   | 288   | 61    | 418   | 352   | 0.3151 | 0.9428 |
| fumaric acid            | 3693   | 2258   | 4343  | 5126  | 2873  | 2026  | 4110  | 2900  | 0.7178 | 0.9428 |
| fucose                  | 61430  | 18665  | 39366 | 16373 | 42835 | 25592 | 57210 | 67805 | 0.5626 | 0.9428 |
| fructose                | 5327   | 7956   | 8277  | 8122  | 3282  | 1815  | 6742  | 5918  | 0.2424 | 0.9428 |
| ferulic acid            | 706    | 403    | 911   | 940   | 672   | 342   | 616   | 379   | 0.6646 | 0.9428 |
| ethanolamine            | 17432  | 13608  | 18418 | 10619 | 20542 | 14052 | 18731 | 10278 | 0.9637 | 0.9995 |
| erythrose               | 378    | 166    | 323   | 97    | 349   | 102   | 355   | 142   | 0.8642 | 0.9672 |
| erythritol              | 2540   | 2685   | 2040  | 2646  | 1598  | 2185  | 3783  | 5016  | 0.5344 | 0.9428 |
| epsilon-caprolactam     | 1497   | 1066   | 714   | 541   | 1637  | 1409  | 1832  | 1935  | 0.3046 | 0.9428 |
| enolpyruvate NIST       | 377    | 244    | 379   | 132   | 459   | 178   | 452   | 195   | 0.7297 | 0.9428 |
| diglycerol              | 1828   | 1064   | 1826  | 1591  | 1355  | 757   | 1807  | 877   | 0.6744 | 0.9428 |
| digalacturonic acid     | 438    | 156    | 255   | 118   | 288   | 75    | 392   | 454   | 0.4775 | 0.9428 |
| deoxycholic acid        | 164119 | 329933 | 33803 | 44846 | 34786 | 35622 | 22009 | 37906 | 0.2910 | 0.9428 |
| dehydroabietic acid     | 456    | 215    | 352   | 115   | 374   | 98    | 328   | 119   | 0.3570 | 0.9428 |
| daidzein                | 440    | 425    | 217   | 79    | 278   | 77    | 274   | 171   | 0.2685 | 0.9428 |
| cytosin                 | 569    | 275    | 338   | 204   | 491   | 169   | 348   | 167   | 0.0700 | 0.9428 |
| cystine                 | 337    | 65     | 290   | 97    | 279   | 90    | 346   | 196   | 0.6084 | 0.9428 |
| cysteine                | 3258   | 3672   | 2731  | 1582  | 1833  | 1347  | 2162  | 733   | 0.4899 | 0.9428 |
| creatinine              | 14195  | 10445  | 11486 | 11703 | 11901 | 14131 | 9288  | 14928 | 0.7501 | 0.9428 |
| conduritol-beta-epoxide | 421    | 250    | 585   | 1018  | 263   | 37    | 4363  | 8810  | 0.2284 | 0.9428 |
| citrulline              | 3574   | 2155   | 5668  | 4444  | 4292  | 2832  | 4164  | 1886  | 0.6456 | 0.9428 |
| citramalic acid         | 855    | 866    | 384   | 130   | 551   | 200   | 514   | 198   | 0.2418 | 0.9428 |
| cholic acid             | 31931  | 84557  | 31219 | 84268 | 1891  | 1259  | 4083  | 8728  | 0.6346 | 0.9428 |
| cholesterol             | 1174   | 798    | 728   | 469   | 738   | 639   | 506   | 190   | 0.0501 | 0.9428 |
| chenodeoxycholic acid   | 730    | 425    | 888   | 718   | 709   | 230   | 623   | 224   | 0.6690 | 0.9428 |
| cerotinic acid          | 1017   | 1652   | 409   | 177   | 354   | 226   | 297   | 216   | 0.3417 | 0.9428 |
| caprylic acid           | 968    | 408    | 947   | 561   | 1069  | 723   | 997   | 1008  | 0.9830 | 0.9995 |
| capric acid             | 650    | 469    | 418   | 128   | 484   | 184   | 507   | 176   | 0.3830 | 0.9428 |
| butyrolactam NIST       | 4162   | 4721   | 3415  | 802   | 2936  | 1967  | 2944  | 1885  | 0.6812 | 0.9428 |
| biphenyl                | 2127   | 2463   | 1630  | 823   | 2483  | 3066  | 1286  | 682   | 0.6580 | 0.9428 |
| beta-sitosterol         | 783    | 535    | 537   | 301   | 565   | 201   | 416   | 202   | 0.1805 | 0.9428 |
| beta-glutamic acid      | 776    | 699    | 693   | 639   | 517   | 405   | 443   | 208   | 0.5731 | 0.9428 |

|                                      |        |        |         |        |         |        |         |        |        |        |
|--------------------------------------|--------|--------|---------|--------|---------|--------|---------|--------|--------|--------|
| beta-gentiobiose                     | 5991   | 9903   | 5155    | 6236   | 3166    | 2426   | 3854    | 3282   | 0.5632 | 0.9428 |
| beta-alanine                         | 34778  | 47846  | 22654   | 28008  | 54389   | 94508  | 21237   | 24547  | 0.5354 | 0.9428 |
| benzoic acid                         | 8387   | 2562   | 7028    | 1035   | 8047    | 2349   | 6345    | 2739   | 0.2883 | 0.9428 |
| azelaic acid                         | 501    | 454    | 488     | 295    | 535     | 410    | 393     | 218    | 0.8394 | 0.9672 |
| aspartic acid                        | 16537  | 10373  | 15744   | 10269  | 14692   | 14145  | 16673   | 11407  | 0.9817 | 0.9995 |
| asparagine                           | 2368   | 2318   | 1827    | 1424   | 1916    | 1462   | 1572    | 1186   | 0.8009 | 0.9635 |
| arachidic acid                       | 1773   | 879    | 1186    | 375    | 1407    | 515    | 1197    | 576    | 0.1503 | 0.9428 |
| aminomalonnate                       | 1318   | 804    | 1170    | 595    | 1013    | 716    | 1865    | 1246   | 0.1207 | 0.9428 |
| alpha-ketoglutarate                  | 476    | 539    | 292     | 146    | 350     | 203    | 223     | 73     | 0.3295 | 0.9428 |
| alpha-aminoadipic acid               | 1273   | 888    | 1246    | 451    | 1294    | 649    | 1154    | 531    | 0.9712 | 0.9995 |
| allantoic acid                       | 1876   | 3859   | 784     | 621    | 559     | 385    | 1213    | 1025   | 0.5414 | 0.9428 |
| alanine-alanine                      | 8517   | 7724   | 9126    | 9035   | 4813    | 6730   | 5268    | 3430   | 0.5028 | 0.9428 |
| alanine                              | 352929 | 84265  | 291792  | 70039  | 422427  | 245166 | 454471  | 246170 | 0.3495 | 0.9428 |
| adipic acid                          | 1696   | 2449   | 827     | 307    | 1001    | 684    | 778     | 291    | 0.4036 | 0.9428 |
| adenosine                            | 714    | 410    | 698     | 613    | 647     | 454    | 440     | 243    | 0.2198 | 0.9428 |
| adenine                              | 2281   | 1468   | 3072    | 3106   | 2269    | 951    | 2320    | 1458   | 0.7247 | 0.9428 |
| 7-methylguanine NIST                 | 812    | 751    | 506     | 222    | 522     | 382    | 392     | 184    | 0.2435 | 0.9428 |
| 6-deoxyglucose                       | 48154  | 50420  | 23255   | 27963  | 19935   | 18748  | 39469   | 30311  | 0.2008 | 0.9428 |
| 5-aminovaleric acid                  | 769974 | 505516 | 1022742 | 504324 | 1134638 | 928791 | 1081002 | 580587 | 0.6725 | 0.9428 |
| 5,6-dihydrouracil                    | 705    | 443    | 584     | 346    | 490     | 212    | 441     | 144    | 0.4308 | 0.9428 |
| 4-hydroxyphenylacetic acid           | 37417  | 49403  | 62123   | 101325 | 30578   | 19077  | 18204   | 7958   | 0.5397 | 0.9428 |
| 4-hydroxybutyric acid                | 866    | 331    | 742     | 512    | 1024    | 389    | 946     | 528    | 0.4519 | 0.9428 |
| 4-hydroxybenzoate                    | 9131   | 9318   | 8962    | 7552   | 9795    | 5435   | 8409    | 5044   | 0.9721 | 0.9995 |
| 4-aminobutyric acid                  | 1455   | 1544   | 6069    | 13293  | 1699    | 1463   | 1492    | 826    | 0.4708 | 0.9428 |
| 3-ureidopropionate                   | 5123   | 4049   | 3510    | 1817   | 3860    | 3349   | 4523    | 4006   | 0.7435 | 0.9428 |
| 3-phenyllactic acid                  | 868    | 710    | 842     | 469    | 1217    | 1215   | 1259    | 1066   | 0.6946 | 0.9428 |
| 3-hydroxypalmitic acid               | 1710   | 1576   | 1255    | 1034   | 1582    | 1317   | 1166    | 916    | 0.5965 | 0.9428 |
| 3-hydroxybutyric acid                | 12107  | 18128  | 5133    | 8279   | 10868   | 15203  | 4324    | 3805   | 0.3975 | 0.9428 |
| 3-hydroxy-3-methylglutaric acid      | 263    | 87     | 266     | 86     | 286     | 86     | 278     | 202    | 0.9835 | 0.9995 |
| 3-aminoisobutyric acid               | 6885   | 4505   | 7525    | 6858   | 8756    | 6704   | 5248    | 2386   | 0.6475 | 0.9428 |
| 3,6-anhydro-D-galactose              | 2290   | 1987   | 1344    | 576    | 1434    | 491    | 1289    | 491    | 0.2351 | 0.9428 |
| 3,4-dihydroxyphenylacetic acid       | 942    | 863    | 1362    | 1645   | 1388    | 1648   | 1715    | 1240   | 0.7532 | 0.9428 |
| 3,4-dihydroxyhydrocinnamic acid NIST | 80875  | 102477 | 90719   | 83496  | 188385  | 381565 | 138412  | 129853 | 0.6971 | 0.9428 |
| 3,4-dihydroxycinnamic acid           | 717    | 394    | 543     | 518    | 693     | 443    | 698     | 477    | 0.8629 | 0.9672 |

|                                   |       |       |       |       |       |       |       |       |        |        |
|-----------------------------------|-------|-------|-------|-------|-------|-------|-------|-------|--------|--------|
| 3,4-dihydroxybenzoic acid         | 3791  | 4287  | 3204  | 2212  | 2416  | 2130  | 3172  | 1898  | 0.6567 | 0.9428 |
| 3-(4-hydroxyphenyl)propionic acid | 19914 | 30495 | 14388 | 15007 | 18356 | 15436 | 12209 | 6483  | 0.6398 | 0.9428 |
| 3-(3-hydroxyphenyl)propionic acid | 35629 | 83410 | 32192 | 45963 | 32212 | 50420 | 13999 | 31821 | 0.6611 | 0.9428 |
| 2-ketoisocaproic acid             | 6918  | 3558  | 4803  | 2273  | 6495  | 1714  | 4963  | 2731  | 0.2875 | 0.9428 |
| 2-ketobutyric acid                | 2942  | 1877  | 3133  | 2407  | 3817  | 1878  | 3186  | 1376  | 0.8110 | 0.9635 |
| 2-hydroxyhexanoic acid            | 2696  | 3471  | 2461  | 2518  | 2174  | 3399  | 2818  | 3190  | 0.9612 | 0.9995 |
| 2-hydroxyglutaric acid            | 800   | 413   | 585   | 327   | 579   | 209   | 569   | 260   | 0.4764 | 0.9428 |
| 2-hydroxybutanoic acid            | 6929  | 6672  | 10915 | 7034  | 14233 | 22053 | 15368 | 20415 | 0.7472 | 0.9428 |
| 2-deoxytetronic acid              | 1726  | 1310  | 1439  | 1006  | 1104  | 759   | 2333  | 3164  | 0.4854 | 0.9428 |
| 2-deoxyerythritol                 | 1480  | 1327  | 1192  | 1146  | 1316  | 1170  | 1853  | 1595  | 0.7789 | 0.9569 |
| 2,4-diaminobutyric acid           | 4459  | 3094  | 9014  | 5280  | 7869  | 6460  | 8106  | 5967  | 0.2863 | 0.9428 |
| 1-monopalmitin                    | 1005  | 453   | 599   | 314   | 587   | 456   | 519   | 244   | 0.0821 | 0.9428 |
| 1-kestose                         | 320   | 232   | 209   | 62    | 302   | 134   | 194   | 135   | 0.1891 | 0.9428 |
| 1-deoxyerythritol                 | 1916  | 952   | 1697  | 899   | 2145  | 1444  | 2070  | 1226  | 0.8725 | 0.9672 |
| 1,5-anhydroglucitol               | 9715  | 25818 | 573   | 685   | 730   | 497   | 3231  | 6917  | 0.5051 | 0.9428 |
| 2,5-dihydroxypyrazine NIST        | 707   | 400   | 895   | 488   | 665   | 202   | 681   | 265   | 0.5950 | 0.9428 |

---

p-values adjusted by Benjamini and Hochberg FDR
