# Supplementary material for: Effects of metronidazole on the fecal microbiome and metabolome in healthy dogs
Source: PubMed Central journal article supplement (PMC7517498; doi:10.1111/jvim.15871), 2020-08-28
Supplement: JVIM-34-1853-s005.pdf [file JVIM-34-1853-s005.pdf]

**Group 2 diet Summary Statistics for fecal metabolomics**

| Compound name          | day 0  |                    | day 7  |                    | day 21 |                    | day 42 |                    | p-value | q-value |
|------------------------|--------|--------------------|--------|--------------------|--------|--------------------|--------|--------------------|---------|---------|
|                        | mean   | standard deviation | mean   | standard deviation | mean   | standard deviation | mean   | standard deviation |         |         |
| xylulose NIST          | 10403  | 10356              | 6419   | 7685               | 3526   | 3847               | 5205   | 6151               | 0.2574  | 0.6499  |
| xylose                 | 374810 | 495547             | 172332 | 368086             | 39536  | 56293              | 112648 | 187640             | 0.2411  | 0.6499  |
| xylitol                | 619    | 247                | 329    | 124                | 402    | 265                | 603    | 379                | 0.0603  | 0.6499  |
| xanthosine             | 406    | 152                | 289    | 121                | 287    | 147                | 268    | 156                | 0.2208  | 0.6499  |
| xanthine               | 6625   | 3442               | 3936   | 2809               | 4110   | 2429               | 5188   | 4537               | 0.2720  | 0.6499  |
| vanillic acid          | 693    | 535                | 2467   | 3664               | 2093   | 2824               | 2024   | 1596               | 0.5165  | 0.7631  |
| valine                 | 209387 | 93034              | 303007 | 150011             | 308825 | 97783              | 265403 | 154784             | 0.1813  | 0.6499  |
| urocanic acid          | 881    | 358                | 680    | 335                | 709    | 232                | 694    | 237                | 0.4834  | 0.7430  |
| uridine                | 1813   | 1696               | 548    | 275                | 630    | 320                | 668    | 339                | 0.0308  | 0.6499  |
| uric acid              | 4992   | 6776               | 4022   | 3381               | 6843   | 6040               | 5580   | 8022               | 0.8146  | 0.9030  |
| urea                   | 1753   | 1614               | 1342   | 518                | 1749   | 583                | 2094   | 996                | 0.5526  | 0.7649  |
| uracil                 | 56172  | 46032              | 35585  | 13195              | 45647  | 24114              | 51502  | 41406              | 0.4693  | 0.7430  |
| UDP-glucuronic acid    | 1193   | 942                | 611    | 378                | 556    | 314                | 789    | 509                | 0.1244  | 0.6499  |
| tyrosine               | 106304 | 72672              | 220005 | 148994             | 317573 | 156326             | 168805 | 103926             | 0.0123  | 0.6499  |
| tyramine               | 157571 | 189895             | 146224 | 117616             | 131582 | 107299             | 79280  | 66106              | 0.6658  | 0.8180  |
| tryptophan             | 42931  | 23035              | 43895  | 36004              | 38041  | 15740              | 45268  | 37534              | 0.9029  | 0.9157  |
| trehalose              | 2839   | 5132               | 22043  | 23660              | 29421  | 28349              | 19913  | 18592              | 0.0621  | 0.6499  |
| trans-4-hydroxyproline | 7835   | 2561               | 3301   | 2882               | 4293   | 2856               | 6195   | 7192               | 0.2366  | 0.6499  |
| thymine                | 15546  | 8009               | 8963   | 2639               | 13247  | 7676               | 12959  | 6345               | 0.1789  | 0.6499  |
| thymidine              | 1857   | 1836               | 512    | 156                | 864    | 415                | 1153   | 920                | 0.0739  | 0.6499  |
| threonine              | 16571  | 9617               | 24937  | 12159              | 22600  | 14792              | 27858  | 13404              | 0.2571  | 0.6499  |
| threonic acid          | 235    | 74                 | 221    | 111                | 195    | 115                | 223    | 113                | 0.8773  | 0.9075  |
| threitol               | 974    | 544                | 617    | 713                | 696    | 471                | 1007   | 529                | 0.3591  | 0.7266  |
| taurine                | 8587   | 7520               | 4626   | 5503               | 1493   | 818                | 2072   | 3227               | 0.0188  | 0.6499  |
| tagatose               | 685    | 250                | 624    | 564                | 659    | 516                | 1195   | 1350               | 0.4872  | 0.7430  |
| sucrose                | 162    | 45                 | 175    | 165                | 219    | 89                 | 254    | 270                | 0.7105  | 0.8393  |
| stearic acid           | 101865 | 102706             | 76086  | 30554              | 87191  | 49262              | 80563  | 49793              | 0.7954  | 0.8943  |
| spermidine             | 7587   | 8511               | 4638   | 3048               | 7830   | 4707               | 10405  | 9661               | 0.3616  | 0.7266  |
| sinapinic acid         | 1036   | 1121               | 268    | 223                | 307    | 136                | 455    | 396                | 0.0723  | 0.6499  |

|                                      |        |       |        |        |        |        |        |        |        |        |
|--------------------------------------|--------|-------|--------|--------|--------|--------|--------|--------|--------|--------|
| shikimic acid                        | 1391   | 1032  | 1873   | 1856   | 1732   | 2373   | 1273   | 1547   | 0.8812 | 0.9075 |
| serine                               | 28232  | 14501 | 46474  | 15441  | 53846  | 29332  | 46571  | 22289  | 0.0754 | 0.6499 |
| sebacic acid, di(2-octyl) ester NIST | 247    | 102   | 335    | 442    | 281    | 173    | 650    | 531    | 0.1270 | 0.6499 |
| salicylaldehyde                      | 1787   | 1398  | 2479   | 2088   | 1525   | 1101   | 1675   | 1690   | 0.6943 | 0.8339 |
| ribose                               | 117959 | 83738 | 90374  | 40749  | 104704 | 105914 | 122939 | 89509  | 0.5222 | 0.7631 |
| ribonic acid                         | 369    | 89    | 305    | 277    | 212    | 132    | 403    | 309    | 0.2660 | 0.6499 |
| ribitol                              | 6271   | 12019 | 3075   | 2464   | 2449   | 1872   | 2495   | 1347   | 0.4728 | 0.7430 |
| raffinose                            | 308    | 362   | 284    | 255    | 1000   | 1253   | 671    | 931    | 0.3100 | 0.7016 |
| pyruvic acid                         | 5561   | 3469  | 3778   | 1538   | 3980   | 1625   | 3979   | 2648   | 0.4358 | 0.7349 |
| putrescine                           | 165399 | 75113 | 119893 | 163746 | 92455  | 70728  | 131904 | 153015 | 0.7170 | 0.8424 |
| pseudo uridine                       | 1997   | 862   | 1342   | 1132   | 1528   | 1224   | 2497   | 1648   | 0.0155 | 0.6499 |
| propane-1,3-diol NIST                | 1854   | 2657  | 717    | 566    | 514    | 433    | 841    | 712    | 0.1735 | 0.6499 |
| proline                              | 94782  | 79070 | 110639 | 43951  | 144151 | 63728  | 99103  | 58700  | 0.3534 | 0.7244 |
| piperidone                           | 50080  | 42458 | 50723  | 29764  | 59596  | 62933  | 46201  | 48319  | 0.8515 | 0.9075 |
| pipecolic acid                       | 11059  | 12591 | 6729   | 3432   | 21796  | 34328  | 9469   | 5133   | 0.3972 | 0.7349 |
| pinitol                              | 293    | 138   | 209    | 80     | 986    | 2154   | 613    | 648    | 0.4248 | 0.7349 |
| pimelic acid                         | 371    | 134   | 236    | 80     | 311    | 126    | 295    | 158    | 0.2593 | 0.6499 |
| phosphate                            | 3214   | 5557  | 1158   | 730    | 858    | 346    | 1012   | 618    | 0.3538 | 0.7244 |
| phenylpyruvate                       | 899    | 377   | 691    | 520    | 1000   | 559    | 822    | 843    | 0.6753 | 0.8203 |
| phenylethylamine                     | 3528   | 3133  | 6044   | 6108   | 5661   | 6088   | 6158   | 6748   | 0.7285 | 0.8512 |
| phenylalanine                        | 102068 | 46784 | 102362 | 40726  | 138250 | 47003  | 112544 | 58198  | 0.1664 | 0.6499 |
| phenylacetic acid                    | 6518   | 8346  | 13361  | 14850  | 20834  | 17899  | 22143  | 30356  | 0.3785 | 0.7331 |
| phenol                               | 2543   | 1496  | 2208   | 1380   | 1582   | 737    | 2988   | 1189   | 0.1228 | 0.6499 |
| pentitol                             | 256    | 103   | 167    | 80     | 188    | 125    | 250    | 142    | 0.2442 | 0.6499 |
| pentadecanoic acid                   | 4065   | 3521  | 4411   | 1851   | 7240   | 5191   | 3589   | 2486   | 0.2065 | 0.6499 |
| parabanic acid NIST                  | 2723   | 2336  | 1313   | 1227   | 2089   | 1062   | 1218   | 497    | 0.0971 | 0.6499 |
| pantothenic acid                     | 6977   | 6819  | 2732   | 1839   | 3823   | 2119   | 2838   | 2280   | 0.0528 | 0.6499 |
| palmitic acid                        | 22725  | 17534 | 20919  | 9325   | 24388  | 17667  | 18940  | 10302  | 0.7986 | 0.8943 |
| oxoproline                           | 31977  | 18369 | 24813  | 10042  | 49643  | 40411  | 35844  | 23021  | 0.1902 | 0.6499 |
| ornithine                            | 19946  | 9576  | 10906  | 8272   | 15211  | 6976   | 10913  | 3490   | 0.1088 | 0.6499 |
| oleic acid                           | 286    | 102   | 1003   | 2295   | 1022   | 1164   | 379    | 382    | 0.5739 | 0.7760 |
| octadecanol                          | 634    | 525   | 744    | 1268   | 300    | 110    | 345    | 227    | 0.5550 | 0.7649 |
| O-acetylserine                       | 592    | 272   | 453    | 248    | 373    | 284    | 485    | 258    | 0.3729 | 0.7331 |
| norvaline                            | 12837  | 19485 | 5260   | 3082   | 5240   | 8080   | 7154   | 5281   | 0.4716 | 0.7430 |

|                                     |        |        |        |        |        |        |        |        |        |        |
|-------------------------------------|--------|--------|--------|--------|--------|--------|--------|--------|--------|--------|
| N-methylalanine                     | 108484 | 55603  | 132787 | 53396  | 150486 | 60793  | 103259 | 56972  | 0.3217 | 0.7035 |
| nicotinic acid                      | 20922  | 10789  | 19128  | 9466   | 19315  | 14223  | 22694  | 7524   | 0.8651 | 0.9075 |
| nicotianamine                       | 587    | 840    | 228    | 97     | 305    | 143    | 366    | 474    | 0.4119 | 0.7349 |
| N-acetylputrescine                  | 2298   | 1105   | 1397   | 634    | 3821   | 3314   | 1996   | 1279   | 0.1456 | 0.6499 |
| N-acetyloronithine                  | 2066   | 1230   | 1129   | 280    | 2505   | 2707   | 1139   | 680    | 0.2167 | 0.6499 |
| N-acetyl-D-mannosamine              | 9627   | 16595  | 6393   | 7575   | 4840   | 4328   | 5235   | 4767   | 0.4010 | 0.7349 |
| N-acetyl-D-hexosamine               | 1065   | 534    | 717    | 318    | 947    | 757    | 775    | 287    | 0.2976 | 0.6881 |
| N-acetyl-D-galactosamine            | 37978  | 64983  | 23527  | 25749  | 18082  | 17981  | 20763  | 19848  | 0.3684 | 0.7331 |
| myristic acid                       | 7333   | 5795   | 5458   | 2761   | 6316   | 2870   | 6912   | 3726   | 0.7090 | 0.8393 |
| myo-inositol                        | 1652   | 1104   | 1013   | 807    | 1260   | 1495   | 1245   | 1469   | 0.2577 | 0.6499 |
| montanic acid                       | 793    | 298    | 601    | 272    | 674    | 405    | 647    | 193    | 0.5466 | 0.7631 |
| methyltetrahydrophenanthrenone NIST | 1824   | 987    | 1421   | 893    | 1554   | 1323   | 1602   | 779    | 0.8715 | 0.9075 |
| methyl O-D-galactopyranoside        | 1884   | 1525   | 1158   | 1648   | 846    | 488    | 1508   | 1863   | 0.5031 | 0.7564 |
| methionine sulfoxide                | 8826   | 5803   | 9251   | 4565   | 8596   | 4496   | 7669   | 3509   | 0.8641 | 0.9075 |
| methionine                          | 19614  | 10317  | 30207  | 15687  | 30235  | 13566  | 29231  | 17288  | 0.2433 | 0.6499 |
| methanolphosphate                   | 2102   | 2977   | 685    | 466    | 592    | 159    | 975    | 888    | 0.2370 | 0.6499 |
| melezitose                          | 205    | 128    | 165    | 40     | 206    | 106    | 214    | 116    | 0.7419 | 0.8576 |
| maltotriose                         | 221    | 110    | 1551   | 1982   | 1561   | 1418   | 877    | 997    | 0.0994 | 0.6499 |
| maltose                             | 12663  | 22478  | 94457  | 96388  | 131481 | 126601 | 86010  | 79274  | 0.0557 | 0.6499 |
| maltitol                            | 450    | 392    | 254    | 178    | 407    | 344    | 323    | 143    | 0.3168 | 0.7021 |
| malonic acid                        | 280    | 173    | 220    | 88     | 467    | 333    | 296    | 224    | 0.1421 | 0.6499 |
| malic acid                          | 3367   | 6954   | 564    | 407    | 794    | 548    | 5374   | 12848  | 0.5264 | 0.7631 |
| maleimide                           | 1617   | 739    | 948    | 339    | 1724   | 652    | 2046   | 1979   | 0.2408 | 0.6499 |
| maleic acid                         | 466    | 486    | 256    | 97     | 303    | 188    | 377    | 408    | 0.5949 | 0.7924 |
| lyxose                              | 16795  | 19661  | 10487  | 22450  | 2642   | 4409   | 5774   | 8773   | 0.3397 | 0.7160 |
| lyxitol                             | 2592   | 1060   | 2013   | 1905   | 3535   | 3818   | 2664   | 1374   | 0.6178 | 0.8051 |
| lysine                              | 166368 | 138551 | 235186 | 103927 | 255340 | 96706  | 172861 | 131062 | 0.2314 | 0.6499 |
| lithocholic acid                    | 975    | 935    | 674    | 671    | 2485   | 2347   | 546    | 411    | 0.0298 | 0.6499 |
| linoleic acid                       | 309    | 161    | 524    | 828    | 250    | 167    | 350    | 257    | 0.6334 | 0.8058 |
| lignoceric acid                     | 398    | 241    | 366    | 139    | 424    | 208    | 472    | 283    | 0.7964 | 0.8943 |
| levoglucosan                        | 1734   | 2441   | 1314   | 2538   | 639    | 704    | 603    | 426    | 0.5338 | 0.7631 |
| leucine                             | 194075 | 87967  | 269522 | 130109 | 254899 | 109712 | 250321 | 156227 | 0.4187 | 0.7349 |
| lactulose                           | 2411   | 3724   | 1425   | 959    | 1514   | 1148   | 1371   | 1041   | 0.6034 | 0.7948 |
| lactose                             | 1143   | 2089   | 968    | 940    | 766    | 511    | 1175   | 751    | 0.8949 | 0.9119 |

|                          |        |       |        |        |        |       |        |        |        |        |
|--------------------------|--------|-------|--------|--------|--------|-------|--------|--------|--------|--------|
| lactitol                 | 2071   | 2831  | 2838   | 1748   | 2656   | 1816  | 3010   | 1191   | 0.8148 | 0.9030 |
| kynurenic acid           | 677    | 805   | 485    | 389    | 752    | 1012  | 723    | 548    | 0.8429 | 0.9075 |
| isothreonic acid         | 609    | 325   | 431    | 301    | 345    | 196   | 464    | 250    | 0.2368 | 0.6499 |
| isomaltose               | 366    | 150   | 454    | 269    | 541    | 237   | 488    | 298    | 0.4379 | 0.7349 |
| isoleucine               | 142321 | 84821 | 227737 | 115021 | 262398 | 79949 | 202621 | 127200 | 0.0459 | 0.6499 |
| inosine                  | 1454   | 1143  | 668    | 320    | 504    | 452   | 749    | 1019   | 0.1276 | 0.6499 |
| indole-3-lactate         | 22460  | 21302 | 4915   | 7695   | 3786   | 7379  | 15006  | 33488  | 0.2682 | 0.6499 |
| indole-3-acetate         | 2995   | 2893  | 2098   | 2109   | 2166   | 2046  | 2313   | 1904   | 0.8294 | 0.9075 |
| hypoxanthine             | 9610   | 8390  | 3463   | 2812   | 2289   | 1205  | 6084   | 8490   | 0.0807 | 0.6499 |
| hydroxylamine            | 65931  | 45521 | 64363  | 29494  | 52870  | 40429 | 48792  | 25848  | 0.7796 | 0.8916 |
| hydroxycarbamate NIST    | 16999  | 12823 | 14503  | 7118   | 11218  | 7883  | 9495   | 5485   | 0.4363 | 0.7349 |
| homoserine               | 1631   | 368   | 1222   | 968    | 939    | 539   | 1505   | 720    | 0.1258 | 0.6499 |
| homocystine              | 646    | 540   | 354    | 146    | 427    | 259   | 451    | 322    | 0.2612 | 0.6499 |
| histidine                | 13141  | 11480 | 17009  | 7808   | 19917  | 7721  | 11927  | 10055  | 0.2153 | 0.6499 |
| hexuronic acid           | 2111   | 1941  | 1554   | 1375   | 1083   | 718   | 1286   | 1130   | 0.2332 | 0.6499 |
| hexonic acid             | 721    | 638   | 1041   | 627    | 1292   | 1023  | 766    | 587    | 0.3967 | 0.7349 |
| hexitol                  | 541    | 281   | 417    | 169    | 355    | 192   | 418    | 286    | 0.0713 | 0.6499 |
| heptadecanoic acid       | 1811   | 1651  | 1125   | 567    | 2056   | 1800  | 1464   | 980    | 0.4493 | 0.7373 |
| guanosine                | 1001   | 766   | 734    | 557    | 467    | 228   | 838    | 1297   | 0.6063 | 0.7948 |
| guanine                  | 856    | 627   | 641    | 403    | 617    | 216   | 571    | 564    | 0.4205 | 0.7349 |
| glycyl tyrosine          | 742    | 530   | 412    | 123    | 518    | 198   | 370    | 85     | 0.0988 | 0.6499 |
| glycyl proline           | 7731   | 5947  | 4467   | 1271   | 5814   | 2742  | 8085   | 9908   | 0.4823 | 0.7430 |
| glycolic acid            | 8519   | 3276  | 9681   | 8801   | 5232   | 3609  | 12117  | 7018   | 0.2177 | 0.6499 |
| glycine                  | 37789  | 19542 | 41805  | 14268  | 65623  | 27454 | 57933  | 50096  | 0.2720 | 0.6499 |
| glycerol-alpha-phosphate | 519    | 282   | 236    | 157    | 260    | 151   | 315    | 171    | 0.0280 | 0.6499 |
| glycerol-3-galactoside   | 850    | 764   | 4864   | 8539   | 1883   | 1043  | 3104   | 3735   | 0.4135 | 0.7349 |
| glycerol                 | 32536  | 19884 | 65181  | 106956 | 32888  | 22232 | 38835  | 27747  | 0.6423 | 0.8064 |
| glyceric acid            | 6705   | 4037  | 4410   | 3216   | 5622   | 5034  | 6157   | 7463   | 0.7594 | 0.8731 |
| glutaric acid            | 685    | 426   | 312    | 168    | 444    | 176   | 816    | 652    | 0.1020 | 0.6499 |
| glutamine                | 10452  | 8382  | 15458  | 8825   | 20845  | 14731 | 15116  | 9733   | 0.1261 | 0.6499 |
| glutamic acid            | 79874  | 46221 | 91697  | 50417  | 106638 | 31534 | 92495  | 38198  | 0.5690 | 0.7743 |
| glucose-1-phosphate      | 1454   | 812   | 919    | 777    | 640    | 434   | 685    | 248    | 0.0089 | 0.6499 |
| glucose                  | 57362  | 70250 | 190345 | 106282 | 138103 | 26150 | 171428 | 113653 | 0.0338 | 0.6499 |
| glucoheptulose           | 1082   | 1433  | 350    | 192    | 293    | 180   | 609    | 548    | 0.1044 | 0.6499 |

|                         |        |        |       |       |        |        |       |       |        |        |
|-------------------------|--------|--------|-------|-------|--------|--------|-------|-------|--------|--------|
| galacturonic acid       | 2211   | 3576   | 553   | 683   | 308    | 157    | 561   | 735   | 0.1608 | 0.6499 |
| galactitol              | 1702   | 2630   | 647   | 262   | 728    | 400    | 688   | 485   | 0.3754 | 0.7331 |
| galactinol              | 411    | 201    | 241   | 117   | 320    | 181    | 435   | 487   | 0.2901 | 0.6779 |
| fumaric acid            | 3446   | 3393   | 2623  | 1615  | 2884   | 1550   | 7696  | 10606 | 0.2114 | 0.6499 |
| fucose                  | 149618 | 286349 | 67856 | 55932 | 51737  | 43921  | 76084 | 73946 | 0.4012 | 0.7349 |
| fructose                | 4191   | 2959   | 6695  | 6346  | 4848   | 2815   | 6213  | 4210  | 0.6451 | 0.8064 |
| ferulic acid            | 750    | 719    | 537   | 711   | 311    | 261    | 554   | 521   | 0.3441 | 0.7182 |
| ethanolamine            | 37798  | 45490  | 18075 | 11231 | 29374  | 37560  | 23313 | 19510 | 0.3059 | 0.6997 |
| erythrose               | 335    | 139    | 301   | 177   | 268    | 132    | 365   | 190   | 0.6706 | 0.8192 |
| erythritol              | 2612   | 4242   | 2372  | 2606  | 1575   | 2347   | 4069  | 5456  | 0.5355 | 0.7631 |
| epsilon-caprolactam     | 1849   | 2045   | 933   | 568   | 604    | 289    | 949   | 1042  | 0.1911 | 0.6499 |
| enolpyruvate NIST       | 437    | 210    | 342   | 221   | 358    | 128    | 343   | 182   | 0.7401 | 0.8576 |
| diglycerol              | 2214   | 1615   | 558   | 482   | 905    | 928    | 1099  | 738   | 0.0228 | 0.6499 |
| digalacturonic acid     | 586    | 893    | 203   | 90    | 358    | 400    | 291   | 96    | 0.4856 | 0.7430 |
| deoxycholic acid        | 89498  | 118569 | 61274 | 39907 | 130605 | 133915 | 39469 | 32724 | 0.2196 | 0.6499 |
| dehydroabiatic acid     | 403    | 252    | 347   | 116   | 405    | 111    | 402   | 176   | 0.8911 | 0.9119 |
| daidzein                | 415    | 549    | 547   | 270   | 1034   | 861    | 688   | 504   | 0.2086 | 0.6499 |
| cytosin                 | 552    | 290    | 282   | 94    | 372    | 198    | 682   | 876   | 0.4015 | 0.7349 |
| cystine                 | 330    | 136    | 304   | 215   | 380    | 252    | 331   | 206   | 0.8728 | 0.9075 |
| cysteine                | 2123   | 1929   | 1327  | 839   | 1266   | 808    | 1758  | 1043  | 0.5371 | 0.7631 |
| creatinine              | 8306   | 9168   | 7391  | 8916  | 9834   | 8212   | 13492 | 22622 | 0.6328 | 0.8058 |
| conduritol-beta-epoxide | 282    | 111    | 354   | 483   | 654    | 780    | 452   | 450   | 0.5430 | 0.7631 |
| citrulline              | 3062   | 1302   | 4743  | 2430  | 6239   | 3664   | 6729  | 2159  | 0.0302 | 0.6499 |
| citramalic acid         | 1053   | 1158   | 535   | 171   | 725    | 812    | 849   | 562   | 0.5413 | 0.7631 |
| cholic acid             | 5077   | 8723   | 548   | 299   | 1690   | 2668   | 1132  | 1114  | 0.2047 | 0.6499 |
| cholesterol             | 634    | 365    | 604   | 481   | 1051   | 966    | 1190  | 1819  | 0.6329 | 0.8058 |
| chenodeoxycholic acid   | 971    | 887    | 495   | 278   | 487    | 187    | 519   | 207   | 0.1978 | 0.6499 |
| cerotinic acid          | 430    | 137    | 287   | 184   | 369    | 284    | 253   | 116   | 0.2247 | 0.6499 |
| caprylic acid           | 1124   | 841    | 1153  | 556   | 1094   | 604    | 1021  | 550   | 0.9834 | 0.9840 |
| capric acid             | 569    | 402    | 586   | 341   | 485    | 148    | 541   | 144   | 0.8822 | 0.9075 |
| butyrolactam NIST       | 2091   | 644    | 1673  | 762   | 1730   | 973    | 1890  | 1194  | 0.8271 | 0.9075 |
| biphenyl                | 1071   | 491    | 547   | 187   | 1614   | 1988   | 810   | 559   | 0.2801 | 0.6617 |
| beta-sitosterol         | 621    | 333    | 660   | 285   | 727    | 374    | 927   | 909   | 0.6585 | 0.8180 |
| beta-glutamic acid      | 479    | 363    | 477   | 492   | 1502   | 1371   | 1708  | 2988  | 0.2661 | 0.6499 |

|                                      |        |        |        |        |        |        |        |        |        |        |
|--------------------------------------|--------|--------|--------|--------|--------|--------|--------|--------|--------|--------|
| beta-gentiobiose                     | 5912   | 5509   | 3741   | 2446   | 5164   | 3627   | 3622   | 2284   | 0.4227 | 0.7349 |
| beta-alanine                         | 7746   | 12373  | 35143  | 41727  | 21556  | 18795  | 36300  | 54933  | 0.3239 | 0.7035 |
| benzoic acid                         | 7853   | 4660   | 7676   | 4385   | 7164   | 3169   | 8755   | 3620   | 0.8760 | 0.9075 |
| azelaic acid                         | 431    | 345    | 317    | 115    | 418    | 186    | 379    | 147    | 0.6279 | 0.8058 |
| aspartic acid                        | 24695  | 31531  | 23278  | 12337  | 32582  | 14818  | 34698  | 23546  | 0.5393 | 0.7631 |
| asparagine                           | 1218   | 683    | 1312   | 1247   | 1399   | 835    | 1368   | 805    | 0.9840 | 0.9840 |
| arachidic acid                       | 1276   | 627    | 923    | 257    | 1023   | 651    | 985    | 519    | 0.4745 | 0.7430 |
| aminomalonnate                       | 1576   | 1534   | 1515   | 798    | 1781   | 835    | 1415   | 875    | 0.8627 | 0.9075 |
| alpha-ketoglutarate                  | 680    | 1138   | 323    | 92     | 892    | 954    | 381    | 301    | 0.4444 | 0.7349 |
| alpha-aminoadipic acid               | 1350   | 1038   | 434    | 365    | 2474   | 3919   | 596    | 315    | 0.2281 | 0.6499 |
| allantoic acid                       | 1204   | 2315   | 2271   | 3923   | 2272   | 1481   | 2658   | 3239   | 0.5586 | 0.7649 |
| alanine-alanine                      | 9797   | 8322   | 3530   | 3670   | 5146   | 3777   | 4697   | 4166   | 0.0446 | 0.6499 |
| alanine                              | 449669 | 155430 | 410922 | 173253 | 485246 | 167465 | 485254 | 193739 | 0.7898 | 0.8943 |
| adipic acid                          | 618    | 261    | 416    | 257    | 437    | 244    | 514    | 322    | 0.4998 | 0.7564 |
| adenosine                            | 997    | 862    | 575    | 663    | 668    | 839    | 587    | 578    | 0.5934 | 0.7924 |
| adenine                              | 1684   | 1884   | 806    | 701    | 930    | 793    | 1720   | 2158   | 0.4715 | 0.7430 |
| 7-methylguanin NIST                  | 816    | 622    | 395    | 249    | 823    | 505    | 525    | 290    | 0.1089 | 0.6499 |
| 6-deoxyglucose                       | 25883  | 30319  | 42481  | 34294  | 30986  | 40649  | 50020  | 42090  | 0.5369 | 0.7631 |
| 5-aminovaleric acid                  | 830256 | 550182 | 702091 | 449862 | 434318 | 244932 | 875883 | 738300 | 0.1704 | 0.6499 |
| 5,6-dihydrouracil                    | 532    | 336    | 234    | 98     | 353    | 192    | 420    | 351    | 0.1493 | 0.6499 |
| 4-hydroxyphenylacetic acid           | 14312  | 9568   | 6006   | 4500   | 10753  | 7237   | 12470  | 19582  | 0.4801 | 0.7430 |
| 4-hydroxybutyric acid                | 1457   | 1200   | 773    | 549    | 637    | 486    | 887    | 688    | 0.1543 | 0.6499 |
| 4-hydroxybenzoate                    | 6067   | 5820   | 2513   | 2679   | 1510   | 972    | 3613   | 4684   | 0.1755 | 0.6499 |
| 4-aminobutyric acid                  | 1342   | 673    | 583    | 393    | 523    | 428    | 883    | 1174   | 0.1348 | 0.6499 |
| 3-ureidopropionate                   | 5382   | 4621   | 2892   | 1791   | 6311   | 5810   | 5226   | 4310   | 0.2597 | 0.6499 |
| 3-phenyllactic acid                  | 1683   | 1225   | 1137   | 1460   | 1446   | 1680   | 1535   | 2137   | 0.8689 | 0.9075 |
| 3-hydroxypalmitic acid               | 863    | 579    | 488    | 195    | 1282   | 1545   | 978    | 1456   | 0.5971 | 0.7924 |
| 3-hydroxybutyric acid                | 5367   | 2697   | 4374   | 2892   | 3251   | 2271   | 6453   | 4685   | 0.1176 | 0.6499 |
| 3-hydroxy-3-methylglutaric acid      | 261    | 104    | 156    | 59     | 224    | 90     | 193    | 99     | 0.0869 | 0.6499 |
| 3-aminoisobutyric acid               | 3434   | 2595   | 5851   | 4179   | 4770   | 3428   | 5193   | 4166   | 0.4287 | 0.7349 |
| 3,6-anhydro-D-galactose              | 1969   | 1841   | 884    | 604    | 1011   | 462    | 1519   | 915    | 0.2200 | 0.6499 |
| 3,4-dihydroxyphenylacetic acid       | 820    | 1034   | 275    | 238    | 266    | 134    | 419    | 397    | 0.2285 | 0.6499 |
| 3,4-dihydroxyhydrocinnamic acid NIST | 55460  | 47631  | 36823  | 56220  | 19222  | 17436  | 38117  | 88143  | 0.6794 | 0.8206 |
| 3,4-dihydroxycinnamic acid           | 846    | 486    | 306    | 165    | 393    | 244    | 391    | 201    | 0.0069 | 0.6499 |

|                                   |       |       |       |       |       |       |       |       |        |        |
|-----------------------------------|-------|-------|-------|-------|-------|-------|-------|-------|--------|--------|
| 3,4-dihydroxybenzoic acid         | 3191  | 2169  | 2075  | 2845  | 1262  | 1447  | 1864  | 3110  | 0.3344 | 0.7160 |
| 3-(4-hydroxyphenyl)propionic acid | 14273 | 11592 | 13865 | 8007  | 12403 | 12696 | 13712 | 12283 | 0.9646 | 0.9736 |
| 3-(3-hydroxyphenyl)propionic acid | 6531  | 15257 | 6521  | 10852 | 3948  | 6364  | 5701  | 13299 | 0.7098 | 0.8393 |
| 2-ketoisocaproic acid             | 7252  | 4054  | 9485  | 3801  | 13166 | 5757  | 6951  | 4325  | 0.0480 | 0.6499 |
| 2-ketobutyric acid                | 2707  | 1169  | 3017  | 2225  | 4657  | 2014  | 3077  | 1333  | 0.1879 | 0.6499 |
| 2-hydroxyhexanoic acid            | 7065  | 11702 | 1342  | 864   | 1886  | 1520  | 2282  | 2039  | 0.2368 | 0.6499 |
| 2-hydroxyglutaric acid            | 800   | 359   | 426   | 147   | 688   | 280   | 1214  | 1705  | 0.3133 | 0.7016 |
| 2-hydroxybutanoic acid            | 31575 | 40026 | 8018  | 7703  | 10096 | 8614  | 5556  | 3147  | 0.0719 | 0.6499 |
| 2-deoxytetronic acid              | 1855  | 1437  | 1242  | 1200  | 693   | 549   | 2236  | 2838  | 0.3376 | 0.7160 |
| 2-deoxyerythritol                 | 1339  | 1204  | 2759  | 2863  | 2803  | 4080  | 4176  | 7157  | 0.6658 | 0.8180 |
| 2,4-diaminobutyric acid           | 4915  | 3257  | 4183  | 1852  | 4662  | 1937  | 4333  | 2498  | 0.8544 | 0.9075 |
| 1-monopalmitin                    | 998   | 830   | 752   | 645   | 632   | 220   | 808   | 344   | 0.6431 | 0.8064 |
| 1-kestose                         | 330   | 358   | 384   | 275   | 909   | 1189  | 525   | 707   | 0.4377 | 0.7349 |
| 1-deoxyerythritol                 | 1543  | 918   | 5301  | 8326  | 2778  | 3271  | 2340  | 1362  | 0.4430 | 0.7349 |
| 1,5-anhydroglucitol               | 939   | 646   | 522   | 549   | 358   | 241   | 967   | 1396  | 0.4071 | 0.7349 |
| 2,5-dihydroxypyrazine NIST        | 687   | 248   | 351   | 195   | 446   | 213   | 657   | 543   | 0.1442 | 0.6499 |

p-values adjusted by Benjamini and Hochberg FDR
