# Supplementary material for: Effects of metronidazole on the fecal microbiome and metabolome in healthy dogs
Source: PubMed Central journal article supplement (PMC7517498; doi:10.1111/jvim.15871), 2020-08-28
Supplement: JVIM-34-1853-s006.pdf [file JVIM-34-1853-s006.pdf]

**Group 2 metronidazole and Group 3 Combined Summary Statistics for Fecal Metabolomics**

| Compound name          | day 0                   |                    | day 7                    |                    | day 14                    |                    | day 28                   |                    | day 42                    |                    | p-value | q-value |
|------------------------|-------------------------|--------------------|--------------------------|--------------------|---------------------------|--------------------|--------------------------|--------------------|---------------------------|--------------------|---------|---------|
|                        | mean                    | standard deviation | mean                     | standard deviation | mean                      | standard deviation | mean                     | standard deviation | mean                      | standard deviation |         |         |
| xylulose NIST          | 8541.6875 <sup>a</sup>  | 8317               | 1550.1875 <sup>b</sup>   | 2581               | 4735.6875 <sup>ab</sup>   | 8224               | 4656.5625 <sup>ab</sup>  | 5830               | 6538.4375 <sup>ab</sup>   | 6969               | 0.011   | 0.038   |
| xylose                 | 229577                  | 310773             | 35818                    | 75325              | 103670                    | 250489             | 178136                   | 275134             | 226939                    | 360140             | 0.113   | 0.206   |
| xylitol                | 766                     | 590                | 672                      | 399                | 706                       | 595                | 1355                     | 1911               | 784                       | 639                | 0.217   | 0.331   |
| xanthosine             | 344                     | 196                | 197                      | 88                 | 281                       | 175                | 274                      | 142                | 247                       | 88                 | 0.025   | 0.073   |
| xanthine               | 6347.5 <sup>a</sup>     | 4648               | 1797.375 <sup>b</sup>    | 1237               | 2014.875 <sup>b</sup>     | 1372               | 4406.25 <sup>ab</sup>    | 3391               | 3260.375 <sup>b</sup>     | 2246               | 0.000   | 0.001   |
| vanillic acid          | 1714.0625 <sup>a</sup>  | 1652               | 1236.6875 <sup>ab</sup>  | 747                | 994.25 <sup>ab</sup>      | 418                | 654.8125 <sup>b</sup>    | 653                | 792.75 <sup>b</sup>       | 653                | 0.003   | 0.016   |
| valine                 | 203530                  | 135145             | 239069                   | 106644             | 194444                    | 116280             | 203803                   | 119282             | 256245                    | 141390             | 0.484   | 0.587   |
| urocanic acid          | 896                     | 489                | 692                      | 566                | 631                       | 474                | 798                      | 330                | 648                       | 231                | 0.424   | 0.533   |
| uridine                | 913                     | 401                | 824                      | 472                | 1228                      | 909                | 1213                     | 1083               | 666                       | 343                | 0.066   | 0.145   |
| uric acid              | 3812                    | 5923               | 854                      | 893                | 782                       | 452                | 1420                     | 1198               | 2945                      | 7362               | 0.082   | 0.164   |
| urea                   | 3159                    | 1997               | 16136                    | 31846              | 34048                     | 62790              | 2645                     | 1952               | 2574                      | 998                | 0.019   | 0.059   |
| uracil                 | 57787.875 <sup>a</sup>  | 41414              | 7832 <sup>c</sup>        | 4369               | 7433.0625 <sup>c</sup>    | 4030               | 21215.9375 <sup>bc</sup> | 17651              | 31674.0625 <sup>b</sup>   | 23373              | 0.000   | 0.000   |
| UDP-glucuronic acid    | 1031.5 <sup>b</sup>     | 611                | 3827.0625 <sup>a</sup>   | 2634               | 4590.3125 <sup>a</sup>    | 5077               | 864.6875 <sup>b</sup>    | 584                | 720.5 <sup>b</sup>        | 464                | 0.000   | 0.000   |
| tyrosine               | 160967.875 <sup>a</sup> | 85245              | 51785.25 <sup>c</sup>    | 66754              | 66345.8125 <sup>bc</sup>  | 50595              | 160326.375 <sup>a</sup>  | 95390              | 138835.0625 <sup>ab</sup> | 83402              | 0.000   | 0.000   |
| tyramine               | 62290.1875 <sup>c</sup> | 54175              | 318359.0625 <sup>a</sup> | 175503             | 197054.1875 <sup>ab</sup> | 160240             | 122713 <sup>bc</sup>     | 130050             | 150332.9375 <sup>bc</sup> | 172582             | 0.000   | 0.000   |
| tryptophan             | 65880                   | 53622              | 37921                    | 20658              | 38382                     | 16010              | 45871                    | 37736              | 35470                     | 20779              | 0.071   | 0.151   |
| trehalose              | 10731                   | 15863              | 2868                     | 5939               | 2414                      | 3018               | 6209                     | 8585               | 5331                      | 5799               | 0.066   | 0.145   |
| trans-4-hydroxyproline | 11066.6875 <sup>b</sup> | 11069              | 15549.8125 <sup>b</sup>  | 9819               | 36370.75 <sup>a</sup>     | 37558              | 8789.375 <sup>b</sup>    | 5576               | 12934.8125 <sup>b</sup>   | 8497               | 0.000   | 0.002   |
| thymine                | 16149.5 <sup>a</sup>    | 9655               | 3448.125 <sup>c</sup>    | 1698               | 3806.375 <sup>bc</sup>    | 1865               | 7246.4375 <sup>bc</sup>  | 4497               | 9123.625 <sup>b</sup>     | 6095               | 0.000   | 0.000   |
| thymidine              | 1425 <sup>a</sup>       | 788                | 823.1875 <sup>b</sup>    | 337                | 1599.1875 <sup>a</sup>    | 889                | 1106.75 <sup>ab</sup>    | 707                | 769.4375 <sup>b</sup>     | 361                | 0.001   | 0.003   |
| threonine              | 25098                   | 11885              | 25801                    | 16070              | 29829                     | 14183              | 33005                    | 18858              | 32961                     | 16972              | 0.424   | 0.533   |
| threonic acid          | 373                     | 317                | 262                      | 141                | 368                       | 319                | 312                      | 188                | 266                       | 134                | 0.458   | 0.566   |
| threitol               | 1539                    | 1377               | 1233                     | 560                | 1082                      | 580                | 1310                     | 867                | 760                       | 666                | 0.063   | 0.142   |
| taurine                | 3453                    | 3127               | 3919                     | 4706               | 8385                      | 11955              | 7258                     | 6240               | 4249                      | 4752               | 0.174   | 0.285   |
| tagatose               | 1236.0625 <sup>b</sup>  | 1021               | 2765.375 <sup>a</sup>    | 2141               | 2367.125 <sup>ab</sup>    | 1662               | 1970.875 <sup>ab</sup>   | 2086               | 1615.875 <sup>ab</sup>    | 1743               | 0.013   | 0.044   |
| sucrose                | 283                     | 236                | 198                      | 100                | 338                       | 336                | 286                      | 315                | 396                       | 522                | 0.580   | 0.652   |
| stearic acid           | 113620                  | 71337              | 64136                    | 34115              | 94917                     | 49252              | 98556                    | 60255              | 73016                     | 27374              | 0.027   | 0.076   |

|                                      |                          |        |                          |        |                           |        |                         |        |                            |        |       |       |
|--------------------------------------|--------------------------|--------|--------------------------|--------|---------------------------|--------|-------------------------|--------|----------------------------|--------|-------|-------|
| spermidine                           | 8153.5625 <sup>a</sup>   | 7206   | 1682.75 <sup>c</sup>     | 1032   | 2182.625 <sup>bc</sup>    | 1772   | 3848.8125 <sup>bc</sup> | 2260   | 5251.875 <sup>ab</sup>     | 4080   | 0.000 | 0.000 |
| sinapinic acid                       | 465                      | 320    | 605                      | 375    | 551                       | 335    | 446                     | 256    | 495                        | 405    | 0.531 | 0.627 |
| shikimic acid                        | 1487                     | 1278   | 1537                     | 2232   | 1382                      | 982    | 1959                    | 1876   | 1310                       | 1164   | 0.775 | 0.801 |
| serine                               | 39237                    | 20263  | 25343                    | 15302  | 29512                     | 13706  | 43055                   | 31858  | 41197                      | 23425  | 0.080 | 0.164 |
| sebacic acid, di(2-octyl) ester NIST | 534                      | 415    | 232                      | 109    | 467                       | 366    | 367                     | 260    | 420                        | 300    | 0.054 | 0.128 |
| salicylaldehyde                      | 2303.8125 <sup>a</sup>   | 2516   | 692.1875 <sup>b</sup>    | 518    | 848.75 <sup>b</sup>       | 564    | 736.5 <sup>b</sup>      | 501    | 1221.75 <sup>ab</sup>      | 831    | 0.004 | 0.017 |
| ribose                               | 100404.4375 <sup>a</sup> | 72795  | 20023 <sup>c</sup>       | 16342  | 19109.75 <sup>c</sup>     | 10496  | 52107.625 <sup>bc</sup> | 37137  | 64904.125 <sup>ab</sup>    | 62519  | 0.000 | 0.000 |
| ribonic acid                         | 714                      | 852    | 689                      | 303    | 1009                      | 551    | 735                     | 848    | 435                        | 346    | 0.155 | 0.260 |
| ribitol                              | 2287                     | 1203   | 1565                     | 955    | 2245                      | 1966   | 2127                    | 2450   | 3104                       | 4745   | 0.583 | 0.652 |
| raffinose                            | 496                      | 666    | 353                      | 299    | 441                       | 312    | 461                     | 635    | 312                        | 234    | 0.725 | 0.777 |
| pyruvic acid                         | 6480.625 <sup>b</sup>    | 7110   | 31822.125 <sup>a</sup>   | 34001  | 17059 <sup>ab</sup>       | 13474  | 3831.875 <sup>b</sup>   | 1935   | 4123.125 <sup>b</sup>      | 3035   | 0.000 | 0.000 |
| putrescine                           | 191032.25 <sup>bc</sup>  | 250791 | 477699.4375 <sup>a</sup> | 391211 | 392923.8125 <sup>ab</sup> | 346803 | 163580.875 <sup>c</sup> | 352535 | 266151.0625 <sup>abc</sup> | 395031 | 0.000 | 0.002 |
| pseudo uridine                       | 2730.9375 <sup>a</sup>   | 2466   | 973.0625 <sup>b</sup>    | 1095   | 1089.25 <sup>b</sup>      | 1068   | 1642.5625 <sup>ab</sup> | 938    | 1466.3125 <sup>ab</sup>    | 1336   | 0.009 | 0.034 |
| propane-1,3-diol NIST                | 1058.75 <sup>b</sup>     | 1431   | 2721.4375 <sup>ab</sup>  | 2550   | 4202.4375 <sup>a</sup>    | 4979   | 700.1875 <sup>b</sup>   | 639    | 706.125 <sup>b</sup>       | 812    | 0.001 | 0.003 |
| proline                              | 79526                    | 49313  | 90002                    | 96782  | 81795                     | 84745  | 83533                   | 62247  | 97278                      | 75309  | 0.962 | 0.962 |
| piperidone                           | 35832                    | 41165  | 13421                    | 18265  | 18192                     | 21969  | 19088                   | 19580  | 32413                      | 45254  | 0.102 | 0.189 |
| pipecolinic acid                     | 11634                    | 8290   | 7531                     | 13711  | 4970                      | 3784   | 8189                    | 6027   | 16367                      | 18183  | 0.028 | 0.076 |
| pinitol                              | 483                      | 479    | 109117                   | 190602 | 107138                    | 268696 | 91263                   | 243341 | 41422                      | 144983 | 0.231 | 0.347 |
| pimelic acid                         | 414                      | 229    | 294                      | 124    | 405                       | 277    | 411                     | 150    | 371                        | 153    | 0.212 | 0.326 |
| phosphate                            | 2534                     | 4174   | 4195                     | 5051   | 3528                      | 4499   | 1207                    | 1303   | 1109                       | 773    | 0.059 | 0.136 |
| phenylpyruvate                       | 1190.8125 <sup>b</sup>   | 1374   | 4293.5 <sup>a</sup>      | 2876   | 4420.9375 <sup>a</sup>    | 4261   | 1000.5625 <sup>b</sup>  | 705    | 1205.25 <sup>b</sup>       | 1274   | 0.000 | 0.000 |
| phenylethylamine                     | 4022                     | 5153   | 7558                     | 9006   | 4986                      | 10922  | 6769                    | 8300   | 5037                       | 6002   | 0.726 | 0.777 |
| phenylalanine                        | 95895.125 <sup>ab</sup>  | 50717  | 74482.5625 <sup>ab</sup> | 29530  | 61979.0625 <sup>b</sup>   | 27744  | 94790 <sup>ab</sup>     | 50999  | 109223.5625 <sup>a</sup>   | 47472  | 0.009 | 0.034 |
| phenylacetic acid                    | 15852                    | 22487  | 7757                     | 10428  | 9838                      | 9148   | 13172                   | 16119  | 12633                      | 11670  | 0.514 | 0.611 |
| phenol                               | 3904.4375 <sup>b</sup>   | 4133   | 6400.4375 <sup>ab</sup>  | 5202   | 9685.5625 <sup>a</sup>    | 9943   | 2118.8125 <sup>b</sup>  | 1181   | 2244.0625 <sup>b</sup>     | 1180   | 0.000 | 0.002 |
| pentitol                             | 389                      | 269    | 297                      | 229    | 565                       | 743    | 307                     | 159    | 273                        | 176    | 0.088 | 0.171 |
| pentadecanoic acid                   | 4062                     | 3072   | 3934                     | 3830   | 3664                      | 5667   | 4395                    | 4591   | 2963                       | 2600   | 0.843 | 0.859 |
| parabanic acid NIST                  | 2753                     | 2760   | 1503                     | 953    | 2019                      | 2105   | 1465                    | 1487   | 1340                       | 797    | 0.151 | 0.258 |
| pantothenic acid                     | 3565.1875 <sup>a</sup>   | 2655   | 1993.125 <sup>ab</sup>   | 2246   | 1670.25 <sup>b</sup>      | 1370   | 1638.8125 <sup>b</sup>  | 1477   | 1445.5625 <sup>b</sup>     | 1595   | 0.013 | 0.044 |
| palmitic acid                        | 25811                    | 15088  | 18102                    | 12217  | 26800                     | 21615  | 23204                   | 17352  | 19140                      | 7411   | 0.330 | 0.441 |
| oxoproline                           | 40619.4375 <sup>c</sup>  | 18830  | 372966.875 <sup>ab</sup> | 348944 | 405774.4375 <sup>a</sup>  | 288786 | 139633.75 <sup>c</sup>  | 169893 | 166199.8125 <sup>bc</sup>  | 268255 | 0.000 | 0.000 |
| ornithine                            | 25482.125 <sup>ab</sup>  | 24898  | 47722.9375 <sup>a</sup>  | 42097  | 39768.75 <sup>ab</sup>    | 22250  | 21138.1875 <sup>b</sup> | 17298  | 18473.5625 <sup>b</sup>    | 18035  | 0.004 | 0.018 |

|                                   |                         |        |                           |        |                         |       |                          |        |                          |       |       |       |
|-----------------------------------|-------------------------|--------|---------------------------|--------|-------------------------|-------|--------------------------|--------|--------------------------|-------|-------|-------|
| oleic acid                        | 392                     | 295    | 277                       | 435    | 253                     | 181   | 611                      | 906    | 219                      | 132   | 0.098 | 0.183 |
| octadecanol                       | 376                     | 222    | 332                       | 164    | 973                     | 2304  | 444                      | 231    | 378                      | 171   | 0.408 | 0.519 |
| O-acetylserine                    | 546                     | 280    | 395                       | 170    | 446                     | 220   | 899                      | 1710   | 386                      | 315   | 0.345 | 0.458 |
| norvaline                         | 6164                    | 4434   | 3572                      | 7090   | 4088                    | 6699  | 4191                     | 4897   | 6552                     | 7905  | 0.537 | 0.631 |
| N-methylalanine                   | 79846.625 <sup>a</sup>  | 48651  | 35873.5 <sup>b</sup>      | 25254  | 36079.3125 <sup>b</sup> | 30426 | 63103.4375 <sup>ab</sup> | 53877  | 63926.3125 <sup>ab</sup> | 48511 | 0.002 | 0.010 |
| nicotinic acid                    | 24878.5 <sup>a</sup>    | 10806  | 8141.6875 <sup>c</sup>    | 4695   | 9344.5625 <sup>c</sup>  | 4550  | 17289.5 <sup>b</sup>     | 6088   | 18709.6875 <sup>ab</sup> | 8619  | 0.000 | 0.000 |
| nicotianamine                     | 560                     | 514    | 1094                      | 1487   | 1083                    | 1955  | 649                      | 824    | 372                      | 284   | 0.253 | 0.365 |
| N-acetylputrescine                | 2518                    | 1183   | 6420                      | 6646   | 5079                    | 4962  | 2979                     | 4841   | 4169                     | 7336  | 0.084 | 0.165 |
| N-acetylornithine                 | 1978                    | 1242   | 5124                      | 15717  | 1267                    | 621   | 2258                     | 2726   | 1416                     | 1332  | 0.555 | 0.641 |
| N-acetyl-D-mannosamine            | 4094                    | 3833   | 5130                      | 4794   | 8237                    | 14287 | 4654                     | 4929   | 2686                     | 3103  | 0.296 | 0.410 |
| N-acetyl-D-hexosamine             | 997                     | 450    | 548                       | 236    | 933                     | 663   | 944                      | 463    | 884                      | 381   | 0.027 | 0.076 |
| N-acetyl-D-galactosamine          | 15803                   | 15522  | 6369                      | 4780   | 7187                    | 6807  | 14872                    | 23858  | 10728                    | 11834 | 0.051 | 0.124 |
| myristic acid                     | 10277                   | 6513   | 7765                      | 6735   | 11951                   | 9490  | 11289                    | 10989  | 7549                     | 4857  | 0.183 | 0.293 |
| myo-inositol                      | 1340                    | 1061   | 12131                     | 19568  | 29307                   | 60248 | 5809                     | 7466   | 5749                     | 12415 | 0.052 | 0.124 |
| montanic acid                     | 824                     | 368    | 576                       | 376    | 861                     | 662   | 767                      | 348    | 642                      | 349   | 0.131 | 0.230 |
| methyltetrahydrophenanthrene NIST | 2128                    | 1086   | 1721                      | 1159   | 1897                    | 1320  | 1834                     | 1090   | 1424                     | 689   | 0.359 | 0.471 |
| methyl O-D-galactopyranoside      | 1399.4375 <sup>b</sup>  | 1342   | 2824.25 <sup>ab</sup>     | 2086   | 3924.9375 <sup>a</sup>  | 3238  | 1697.1875 <sup>b</sup>   | 1484   | 1457.9375 <sup>b</sup>   | 1521  | 0.000 | 0.003 |
| methionine sulfoxide              | 10237                   | 6967   | 6213                      | 3033   | 7099                    | 8836  | 10527                    | 6417   | 11554                    | 6893  | 0.093 | 0.178 |
| methionine                        | 23819                   | 16481  | 19115                     | 11685  | 18987                   | 8921  | 30179                    | 18460  | 28281                    | 16804 | 0.076 | 0.159 |
| methanolphosphate                 | 1256                    | 1357   | 1258                      | 1204   | 1123                    | 1166  | 734                      | 556    | 709                      | 567   | 0.302 | 0.412 |
| melezitose                        | 269 <sup>b</sup>        | 149    | 277.3125 <sup>ab</sup>    | 244    | 602.75 <sup>a</sup>     | 698   | 244.6875 <sup>b</sup>    | 152    | 206.3125 <sup>b</sup>    | 86    | 0.010 | 0.035 |
| maltotriose                       | 599                     | 753    | 191                       | 103    | 267                     | 196   | 277                      | 148    | 346                      | 343   | 0.029 | 0.079 |
| maltose                           | 45905                   | 68234  | 11174                     | 15937  | 7806                    | 13292 | 20093                    | 34788  | 20374                    | 25700 | 0.026 | 0.075 |
| maltitol                          | 343                     | 133    | 466                       | 493    | 339                     | 308   | 419                      | 229    | 395                      | 681   | 0.871 | 0.884 |
| malonic acid                      | 348                     | 200    | 281                       | 150    | 345                     | 228   | 370                      | 468    | 265                      | 156   | 0.725 | 0.777 |
| malic acid                        | 3821                    | 9048   | 2100                      | 2418   | 2376                    | 4215  | 1195                     | 806    | 1194                     | 729   | 0.480 | 0.587 |
| maleimide                         | 2732                    | 2085   | 2971                      | 2816   | 4483                    | 7363  | 2196                     | 1893   | 2165                     | 1064  | 0.373 | 0.480 |
| maleic acid                       | 370                     | 316    | 255                       | 137    | 333                     | 235   | 301                      | 178    | 288                      | 179   | 0.596 | 0.661 |
| lyxose                            | 10082.8125 <sup>a</sup> | 11590  | 1725.0625 <sup>a</sup>    | 2271   | 1300.5625 <sup>a</sup>  | 804   | 9655.1875 <sup>a</sup>   | 16293  | 11134.5625 <sup>a</sup>  | 15227 | 0.013 | 0.044 |
| lyxitol                           | 3913                    | 3711   | 2501                      | 2601   | 2704                    | 2478  | 3927                     | 3091   | 2885                     | 2982  | 0.359 | 0.471 |
| lysine                            | 156312.5 <sup>a</sup>   | 103522 | 117590.3125 <sup>ab</sup> | 128641 | 65074.3125 <sup>b</sup> | 64207 | 179787.1875 <sup>a</sup> | 103088 | 127550.5 <sup>ab</sup>   | 84978 | 0.008 | 0.031 |
| lithocholic acid                  | 577.375 <sup>a</sup>    | 345    | 186.625 <sup>b</sup>      | 91     | 272.3125 <sup>b</sup>   | 194   | 410.8125 <sup>ab</sup>   | 423    | 306.875 <sup>b</sup>     | 228   | 0.001 | 0.005 |
| linoleic acid                     | 394.5625 <sup>a</sup>   | 241    | 210.0625 <sup>b</sup>     | 74     | 279.3125 <sup>ab</sup>  | 155   | 282.75 <sup>ab</sup>     | 180    | 253.875 <sup>ab</sup>    | 93    | 0.012 | 0.041 |

|                          |                          |        |                         |        |                          |        |                          |        |                         |        |       |       |
|--------------------------|--------------------------|--------|-------------------------|--------|--------------------------|--------|--------------------------|--------|-------------------------|--------|-------|-------|
| lignoceric acid          | 493                      | 263    | 474                     | 673    | 394                      | 226    | 607                      | 567    | 385                     | 255    | 0.624 | 0.688 |
| levoglucosan             | 644                      | 363    | 1479                    | 2910   | 2212                     | 4697   | 650                      | 717    | 463                     | 215    | 0.152 | 0.258 |
| leucine                  | 199269                   | 132624 | 215966                  | 87092  | 182929                   | 89218  | 203699                   | 109859 | 243428                  | 119277 | 0.507 | 0.606 |
| lactulose                | 2188                     | 2264   | 1976                    | 1813   | 2266                     | 3083   | 1713                     | 1250   | 1126                    | 948    | 0.403 | 0.516 |
| lactose                  | 1072                     | 672    | 619                     | 678    | 592                      | 411    | 846                      | 724    | 559                     | 431    | 0.084 | 0.165 |
| lactitol                 | 2682                     | 1473   | 834                     | 1262   | 893                      | 1294   | 1786                     | 2079   | 2461                    | 3287   | 0.016 | 0.052 |
| kynurenic acid           | 693                      | 449    | 5761                    | 8997   | 6466                     | 9775   | 4616                     | 14397  | 448                     | 248    | 0.083 | 0.165 |
| isothreononic acid       | 905                      | 703    | 769                     | 270    | 928                      | 389    | 631                      | 375    | 610                     | 495    | 0.118 | 0.213 |
| isomaltose               | 542                      | 350    | 631                     | 475    | 1076                     | 2025   | 682                      | 295    | 400                     | 314    | 0.364 | 0.474 |
| isoleucine               | 153834                   | 113646 | 158040                  | 63566  | 147920                   | 84438  | 158726                   | 104372 | 186479                  | 101165 | 0.757 | 0.794 |
| inosine                  | 1347.875 <sup>a</sup>    | 1043   | 315.5 <sup>b</sup>      | 189    | 397.4375 <sup>b</sup>    | 282    | 601.5625 <sup>b</sup>    | 279    | 415.3125 <sup>b</sup>   | 357    | 0.000 | 0.000 |
| indole-3-lactate         | 20375                    | 28358  | 15189                   | 8287   | 15064                    | 13098  | 12035                    | 13566  | 8062                    | 12044  | 0.184 | 0.293 |
| indole-3-acetate         | 3039                     | 2696   | 5996                    | 9280   | 6764                     | 10565  | 4335                     | 5180   | 5095                    | 12929  | 0.735 | 0.780 |
| hypoxanthine             | 9537.5625 <sup>a</sup>   | 8712   | 3564.125 <sup>b</sup>   | 2560   | 3940.125 <sup>b</sup>    | 3491   | 7728.625 <sup>ab</sup>   | 6237   | 5494.8125 <sup>ab</sup> | 4796   | 0.006 | 0.025 |
| hydroxylamine            | 86825                    | 74800  | 60521                   | 37071  | 56747                    | 52453  | 58549                    | 50197  | 47521                   | 34623  | 0.262 | 0.373 |
| hydroxycarbamate NIST    | 20164                    | 20205  | 12909                   | 9180   | 13146                    | 13402  | 11757                    | 10291  | 10771                   | 8253   | 0.243 | 0.353 |
| homoserine               | 1771.75 <sup>a</sup>     | 804    | 545.875 <sup>c</sup>    | 324    | 572.4375 <sup>c</sup>    | 285    | 892.8125 <sup>bc</sup>   | 560    | 1112.125 <sup>b</sup>   | 757    | 0.000 | 0.000 |
| homocystine              | 669                      | 545    | 650                     | 357    | 780                      | 419    | 679                      | 248    | 490                     | 244    | 0.235 | 0.350 |
| histidine                | 11623.9375 <sup>b</sup>  | 7551   | 22240.4375 <sup>a</sup> | 16402  | 14351.6875 <sup>ab</sup> | 13100  | 14154.75 <sup>ab</sup>   | 7562   | 9578.75 <sup>b</sup>    | 7017   | 0.005 | 0.022 |
| hexuronic acid           | 1112.875 <sup>b</sup>    | 881    | 3121 <sup>a</sup>       | 2319   | 3452.75 <sup>a</sup>     | 3685   | 1057.1875 <sup>b</sup>   | 821    | 800.9375 <sup>b</sup>   | 591    | 0.000 | 0.000 |
| hexonic acid             | 729                      | 438    | 677                     | 578    | 422                      | 242    | 665                      | 600    | 497                     | 287    | 0.261 | 0.373 |
| hexitol                  | 441                      | 240    | 676                     | 432    | 861                      | 666    | 708                      | 486    | 466                     | 294    | 0.032 | 0.085 |
| heptadecanoic acid       | 1887                     | 1501   | 1285                    | 1032   | 1816                     | 1507   | 1457                     | 843    | 1094                    | 437    | 0.188 | 0.298 |
| guanosine                | 726.3125 <sup>a</sup>    | 934    | 203.9375 <sup>b</sup>   | 91     | 267.875 <sup>b</sup>     | 138    | 415.5 <sup>ab</sup>      | 324    | 256.1875 <sup>b</sup>   | 154    | 0.012 | 0.043 |
| guanine                  | 837                      | 686    | 520                     | 262    | 760                      | 906    | 927                      | 1430   | 544                     | 505    | 0.573 | 0.650 |
| glycyl tyrosine          | 647                      | 409    | 597                     | 544    | 592                      | 408    | 952                      | 1006   | 513                     | 143    | 0.236 | 0.350 |
| glycyl proline           | 10591.8125 <sup>ab</sup> | 8808   | 16924.875 <sup>ab</sup> | 14709  | 18324.8125 <sup>a</sup>  | 16334  | 7456.5625 <sup>b</sup>   | 5784   | 9986.375 <sup>ab</sup>  | 9264   | 0.009 | 0.034 |
| glycolic acid            | 13211.8125 <sup>a</sup>  | 7248   | 4875.875 <sup>c</sup>   | 3605   | 4152 <sup>c</sup>        | 2789   | 9739.75 <sup>ab</sup>    | 5893   | 8228.8125 <sup>bc</sup> | 3157   | 0.000 | 0.000 |
| glycine                  | 52497.375 <sup>b</sup>   | 35985  | 128452 <sup>ab</sup>    | 106348 | 185798.5 <sup>a</sup>    | 134158 | 56720.6875 <sup>b</sup>  | 40001  | 51449.25 <sup>b</sup>   | 56667  | 0.000 | 0.000 |
| glycerol-alpha-phosphate | 790                      | 1005   | 695                     | 519    | 905                      | 838    | 621                      | 358    | 376                     | 260    | 0.161 | 0.266 |
| glycerol-3-galactoside   | 1968                     | 2831   | 1052                    | 781    | 1185                     | 858    | 1579                     | 1160   | 972                     | 1036   | 0.323 | 0.436 |
| glycerol                 | 39382.1875 <sup>a</sup>  | 23643  | 19306.25 <sup>b</sup>   | 18711  | 24400.0625 <sup>ab</sup> | 17442  | 26629.5625 <sup>ab</sup> | 13086  | 33488 <sup>ab</sup>     | 15363  | 0.008 | 0.031 |
| glyceric acid            | 7435                     | 6260   | 3556                    | 1831   | 3600                     | 1899   | 7175                     | 6845   | 5479                    | 3330   | 0.021 | 0.064 |

|                         |                          |        |                         |        |                         |        |                          |        |                         |        |       |       |
|-------------------------|--------------------------|--------|-------------------------|--------|-------------------------|--------|--------------------------|--------|-------------------------|--------|-------|-------|
| glutaric acid           | 1306                     | 1842   | 262                     | 120    | 637                     | 825    | 609                      | 415    | 760                     | 489    | 0.051 | 0.124 |
| glutamine               | 13648                    | 8550   | 10833                   | 9447   | 11201                   | 11336  | 17943                    | 11630  | 17774                   | 12616  | 0.180 | 0.292 |
| glutamic acid           | 85786.5625 <sup>b</sup>  | 33617  | 407191.625 <sup>a</sup> | 303623 | 382784.25 <sup>a</sup>  | 255292 | 165708.6875 <sup>b</sup> | 137244 | 153938.5 <sup>b</sup>   | 161775 | 0.000 | 0.000 |
| glucose-1-phosphate     | 1011.875 <sup>bc</sup>   | 482    | 1676.6875 <sup>ab</sup> | 945    | 1729.8125 <sup>a</sup>  | 965    | 1219 <sup>abc</sup>      | 915    | 767.5625 <sup>c</sup>   | 436    | 0.001 | 0.005 |
| glucose                 | 107749.6875 <sup>a</sup> | 102546 | 22288.4375 <sup>b</sup> | 20613  | 29537.6875 <sup>b</sup> | 35727  | 69522.125 <sup>ab</sup>  | 87771  | 63142.625 <sup>ab</sup> | 67847  | 0.000 | 0.003 |
| glucoheptulose          | 840                      | 844    | 739                     | 431    | 903                     | 695    | 540                      | 238    | 426                     | 224    | 0.035 | 0.092 |
| galacturonic acid       | 1070                     | 1492   | 654                     | 1122   | 443                     | 437    | 1143                     | 2180   | 381                     | 424    | 0.300 | 0.412 |
| galactitol              | 889                      | 706    | 742                     | 670    | 557                     | 495    | 707                      | 531    | 838                     | 1324   | 0.767 | 0.801 |
| galactinol              | 651                      | 638    | 3195                    | 6653   | 1550                    | 2931   | 652                      | 374    | 1621                    | 4978   | 0.292 | 0.407 |
| fumaric acid            | 6162                     | 7669   | 3758                    | 2165   | 3405                    | 2602   | 4084                     | 4060   | 4648                    | 7929   | 0.567 | 0.648 |
| fucose                  | 59954                    | 55053  | 35563                   | 23698  | 44814                   | 36627  | 47728                    | 55994  | 43636                   | 49757  | 0.455 | 0.566 |
| fructose                | 5269                     | 3169   | 3752                    | 5614   | 10015                   | 22833  | 5300                     | 3891   | 5725                    | 5209   | 0.585 | 0.652 |
| ferulic acid            | 688                      | 574    | 956                     | 896    | 807                     | 592    | 455                      | 331    | 541                     | 355    | 0.067 | 0.145 |
| ethanolamine            | 16009                    | 15550  | 22000                   | 23319  | 17283                   | 15301  | 13134                    | 11608  | 10638                   | 10788  | 0.098 | 0.183 |
| erythrose               | 425                      | 210    | 408                     | 262    | 377                     | 190    | 309                      | 194    | 298                     | 167    | 0.241 | 0.353 |
| erythritol              | 11052                    | 18657  | 7248                    | 7376   | 8577                    | 10342  | 8923                     | 13765  | 4273                    | 11519  | 0.229 | 0.347 |
| epsilon-caprolactam     | 1506                     | 1259   | 1256                    | 1236   | 1267                    | 866    | 1799                     | 2306   | 847                     | 405    | 0.329 | 0.441 |
| enolpyruvate NIST       | 456                      | 319    | 490                     | 248    | 607                     | 432    | 466                      | 390    | 335                     | 144    | 0.196 | 0.305 |
| diglycerol              | 2315                     | 2369   | 1908                    | 1271   | 2478                    | 1816   | 1898                     | 1311   | 1947                    | 1767   | 0.804 | 0.823 |
| digalacturonic acid     | 361                      | 181    | 235                     | 140    | 346                     | 184    | 308                      | 215    | 383                     | 419    | 0.453 | 0.566 |
| deoxycholic acid        | 35764.375 <sup>a</sup>   | 37358  | 4284.4375 <sup>b</sup>  | 4229   | 4627.8125 <sup>b</sup>  | 8551   | 18725.625 <sup>ab</sup>  | 23399  | 14134.4375 <sup>b</sup> | 17878  | 0.000 | 0.002 |
| dehydroabietic acid     | 585                      | 312    | 351                     | 178    | 495                     | 260    | 444                      | 239    | 376                     | 144    | 0.024 | 0.072 |
| daidzein                | 639                      | 619    | 493                     | 516    | 592                     | 408    | 410                      | 292    | 493                     | 472    | 0.542 | 0.631 |
| cytosin                 | 593                      | 636    | 516                     | 498    | 439                     | 405    | 417                      | 199    | 388                     | 161    | 0.574 | 0.650 |
| cystine                 | 386                      | 231    | 1500                    | 2971   | 684                     | 830    | 377                      | 160    | 271                     | 112    | 0.070 | 0.150 |
| cysteine                | 2269.875 <sup>b</sup>    | 1856   | 5841.25 <sup>a</sup>    | 3594   | 5697.625 <sup>a</sup>   | 3292   | 3490.875 <sup>ab</sup>   | 2341   | 2710 <sup>b</sup>       | 1831   | 0.000 | 0.001 |
| creatinine              | 14197                    | 17685  | 6794                    | 5753   | 12472                   | 11519  | 14924                    | 17546  | 8578                    | 8328   | 0.303 | 0.412 |
| conduritol-beta-epoxide | 682                      | 1115   | 24047                   | 38509  | 17519                   | 51978  | 12533                    | 36451  | 7311                    | 23122  | 0.190 | 0.298 |
| citrulline              | 4898                     | 2597   | 10247                   | 21960  | 11486                   | 33807  | 5996                     | 3529   | 5657                    | 2929   | 0.710 | 0.771 |
| citramalic acid         | 903.5625 <sup>a</sup>    | 605    | 327.5625 <sup>c</sup>   | 155    | 429.1875 <sup>bc</sup>  | 237    | 697.4375 <sup>ab</sup>   | 499    | 602.6875 <sup>abc</sup> | 298    | 0.000 | 0.002 |
| cholic acid             | 2186                     | 4152   | 57470                   | 80315  | 100432                  | 144778 | 33577                    | 72157  | 22448                   | 59179  | 0.025 | 0.073 |
| cholesterol             | 1041                     | 1302   | 518                     | 222    | 760                     | 570    | 607                      | 313    | 511                     | 294    | 0.120 | 0.215 |
| chenodeoxycholic acid   | 899                      | 982    | 1279                    | 1497   | 1684                    | 1541   | 1413                     | 1614   | 929                     | 1453   | 0.504 | 0.605 |

|                            |                          |        |                          |        |                         |        |                           |        |                          |        |       |       |
|----------------------------|--------------------------|--------|--------------------------|--------|-------------------------|--------|---------------------------|--------|--------------------------|--------|-------|-------|
| cerotinic acid             | 438                      | 343    | 308                      | 144    | 376                     | 228    | 443                       | 402    | 247                      | 170    | 0.207 | 0.320 |
| caprylic acid              | 1985                     | 2032   | 962                      | 682    | 1051                    | 727    | 1149                      | 1090   | 1144                     | 651    | 0.080 | 0.164 |
| capric acid                | 659                      | 275    | 365                      | 226    | 450                     | 236    | 547                       | 477    | 457                      | 155    | 0.035 | 0.092 |
| butyrolactam NIST          | 2477                     | 1579   | 4905                     | 7689   | 3496                    | 3440   | 1962                      | 1192   | 2664                     | 1609   | 0.276 | 0.387 |
| biphenyl                   | 1391                     | 1029   | 1224                     | 1101   | 1378                    | 1104   | 1343                      | 853    | 1230                     | 975    | 0.955 | 0.960 |
| beta-sitosterol            | 828.1875 <sup>a</sup>    | 697    | 399.625 <sup>b</sup>     | 175    | 527.1875 <sup>ab</sup>  | 307    | 545.4375 <sup>ab</sup>    | 296    | 418.0625 <sup>b</sup>    | 233    | 0.008 | 0.033 |
| beta-glutamic acid         | 1324                     | 2174   | 1796                     | 3094   | 2810                    | 3951   | 2336                      | 3356   | 1325                     | 2034   | 0.563 | 0.647 |
| beta-gentiobiose           | 3135                     | 1874   | 13071                    | 19766  | 9594                    | 18831  | 5744                      | 5450   | 10568                    | 32466  | 0.543 | 0.631 |
| beta-alanine               | 22486.4375 <sup>a</sup>  | 40469  | 797.5 <sup>b</sup>       | 514    | 2363.1875 <sup>ab</sup> | 3747   | 15879.375 <sup>ab</sup>   | 13479  | 19784.5625 <sup>ab</sup> | 16776  | 0.009 | 0.034 |
| benzoic acid               | 11125                    | 5385   | 18419                    | 34906  | 14674                   | 15408  | 10423                     | 12870  | 8369                     | 4699   | 0.467 | 0.574 |
| azelaic acid               | 379                      | 178    | 247                      | 155    | 389                     | 237    | 393                       | 223    | 429                      | 283    | 0.145 | 0.249 |
| aspartic acid              | 35714                    | 22523  | 41111                    | 35794  | 32068                   | 19686  | 37545                     | 30310  | 30253                    | 13692  | 0.774 | 0.801 |
| asparagine                 | 1776                     | 1042   | 1938                     | 1865   | 2714                    | 4099   | 2020                      | 1430   | 2197                     | 1653   | 0.737 | 0.780 |
| arachidic acid             | 1651                     | 1369   | 2269                     | 2318   | 1660                    | 809    | 1403                      | 729    | 1032                     | 394    | 0.096 | 0.182 |
| aminomalonnate             | 1607.25 <sup>b</sup>     | 739    | 4219.4375 <sup>a</sup>   | 1971   | 5217.4375 <sup>a</sup>  | 3464   | 1721.25 <sup>b</sup>      | 1409   | 1256.75 <sup>b</sup>     | 727    | 0.000 | 0.000 |
| alpha-ketoglutarate        | 396.875 <sup>b</sup>     | 269    | 1014.3125 <sup>ab</sup>  | 1251   | 1100.9375 <sup>a</sup>  | 965    | 400.1875 <sup>b</sup>     | 213    | 387.0625 <sup>b</sup>    | 310    | 0.003 | 0.016 |
| alpha-aminoadipic acid     | 1055                     | 633    | 632                      | 395    | 797                     | 557    | 895                       | 457    | 963                      | 679    | 0.056 | 0.132 |
| allantoic acid             | 2417                     | 2985   | 857                      | 1160   | 1248                    | 2014   | 1810                      | 2534   | 1221                     | 1149   | 0.160 | 0.266 |
| alanine-alanine            | 10852                    | 13289  | 11819                    | 11167  | 10422                   | 7210   | 12441                     | 13747  | 5953                     | 6204   | 0.271 | 0.383 |
| alanine                    | 446604                   | 170827 | 517168                   | 261975 | 501912                  | 232092 | 316798                    | 156906 | 399535                   | 208288 | 0.045 | 0.112 |
| adipic acid                | 799 <sup>a</sup>         | 482    | 423.3125 <sup>b</sup>    | 157    | 563.5625 <sup>ab</sup>  | 300    | 627.6875 <sup>ab</sup>    | 296    | 533.75 <sup>ab</sup>     | 183    | 0.005 | 0.022 |
| adenosine                  | 755                      | 572    | 358                      | 215    | 452                     | 237    | 411                       | 428    | 488                      | 639    | 0.127 | 0.226 |
| adenine                    | 2407                     | 2114   | 2017                     | 1268   | 2545                    | 2164   | 2085                      | 1884   | 2293                     | 2892   | 0.931 | 0.940 |
| 7-methylguanine NIST       | 678                      | 570    | 401                      | 234    | 475                     | 199    | 538                       | 269    | 403                      | 178    | 0.074 | 0.155 |
| 6-deoxyglucose             | 43145                    | 38229  | 11211                    | 14813  | 7400                    | 7022   | 40069                     | 60200  | 29020                    | 65836  | 0.042 | 0.106 |
| 5-aminovaleric acid        | 935694.9375 <sup>a</sup> | 679169 | 297542.1875 <sup>b</sup> | 286551 | 375092.375 <sup>b</sup> | 264553 | 1169792.4375 <sup>a</sup> | 830539 | 965808.125 <sup>a</sup>  | 678334 | 0.000 | 0.000 |
| 5,6-dihydrouracil          | 920                      | 1257   | 494                      | 291    | 565                     | 309    | 459                       | 253    | 384                      | 291    | 0.139 | 0.243 |
| 4-hydroxyphenylacetic acid | 18103                    | 25782  | 23888                    | 41015  | 13535                   | 17642  | 24172                     | 30128  | 18692                    | 21346  | 0.795 | 0.818 |
| 4-hydroxybutyric acid      | 1171.0625 <sup>ab</sup>  | 694    | 2172.1875 <sup>a</sup>   | 1330   | 2309.6875 <sup>a</sup>  | 2217   | 942.0625 <sup>b</sup>     | 487    | 1425.5625 <sup>ab</sup>  | 1765   | 0.005 | 0.022 |
| 4-hydroxybenzoate          | 4826.25 <sup>a</sup>     | 4373   | 851.9375 <sup>b</sup>    | 471    | 1156.125 <sup>b</sup>   | 955    | 3187.6875 <sup>ab</sup>   | 1929   | 4138.8125 <sup>a</sup>   | 4205   | 0.000 | 0.000 |
| 4-aminobutyric acid        | 1331                     | 1600   | 21045                    | 50510  | 10880                   | 29728  | 2928                      | 5861   | 4618                     | 8188   | 0.237 | 0.350 |
| 3-ureidopropionate         | 4504.125 <sup>a</sup>    | 3396   | 978.5625 <sup>b</sup>    | 736    | 1120.75 <sup>b</sup>    | 460    | 2378.625 <sup>b</sup>     | 1884   | 2284.9375 <sup>b</sup>   | 2612   | 0.000 | 0.001 |
| 3-phenyllactic acid        | 2536.1875 <sup>b</sup>   | 3928   | 12055.375 <sup>a</sup>   | 9507   | 11911.8125 <sup>a</sup> | 12604  | 2077.8125 <sup>b</sup>    | 1794   | 2619.875 <sup>b</sup>    | 3358   | 0.000 | 0.000 |

|                                      |                        |        |                        |       |                         |       |                         |       |                         |       |       |       |
|--------------------------------------|------------------------|--------|------------------------|-------|-------------------------|-------|-------------------------|-------|-------------------------|-------|-------|-------|
| 3-hydroxypalmitic acid               | 1065.5 <sup>a</sup>    | 1206   | 330.5625 <sup>b</sup>  | 415   | 365.9375 <sup>b</sup>   | 354   | 707.75 <sup>ab</sup>    | 623   | 533.75 <sup>ab</sup>    | 655   | 0.003 | 0.016 |
| 3-hydroxybutyric acid                | 9562                   | 15514  | 2786                   | 2639  | 1853                    | 1677  | 4067                    | 4363  | 6446                    | 8516  | 0.062 | 0.140 |
| 3-hydroxy-3-methylglutaric acid      | 258                    | 165    | 246                    | 197   | 293                     | 214   | 456                     | 455   | 227                     | 126   | 0.109 | 0.201 |
| 3-aminoisobutyric acid               | 4872                   | 3215   | 2114                   | 1654  | 4338                    | 7209  | 4999                    | 3119  | 6377                    | 3196  | 0.061 | 0.139 |
| 3,6-anhydro-D-galactose              | 1623                   | 778    | 969                    | 503   | 1620                    | 990   | 1991                    | 1506  | 1586                    | 1355  | 0.143 | 0.247 |
| 3,4-dihydroxyphenylacetic acid       | 695                    | 543    | 3017                   | 4875  | 2958                    | 6673  | 2809                    | 6192  | 1561                    | 3623  | 0.367 | 0.475 |
| 3,4-dihydroxyhydrocinnamic acid NIST | 99467.125 <sup>a</sup> | 137971 | 5720.5 <sup>b</sup>    | 3827  | 7556.5 <sup>b</sup>     | 6674  | 35126.3125 <sup>b</sup> | 34212 | 34774.75 <sup>b</sup>   | 28731 | 0.000 | 0.003 |
| 3,4-dihydroxycinnamic acid           | 1047                   | 1057   | 508                    | 265   | 606                     | 483   | 886                     | 757   | 713                     | 483   | 0.082 | 0.164 |
| 3,4-dihydroxybenzoic acid            | 2909                   | 2946   | 7548                   | 17689 | 7572                    | 24210 | 3936                    | 3057  | 2750                    | 2563  | 0.632 | 0.693 |
| 3-(4-hydroxyphenyl)propionic acid    | 12266.5 <sup>a</sup>   | 9011   | 3327.8125 <sup>b</sup> | 2464  | 2562.625 <sup>b</sup>   | 1386  | 7821 <sup>ab</sup>      | 4256  | 12039.25 <sup>a</sup>   | 9076  | 0.000 | 0.000 |
| 3-(3-hydroxyphenyl)propionic acid    | 7195                   | 16848  | 242                    | 87    | 371                     | 214   | 4684                    | 10724 | 10840                   | 17575 | 0.036 | 0.094 |
| 2-ketoisocaproic acid                | 6927                   | 3470   | 4124                   | 2643  | 3988                    | 1986  | 5483                    | 3167  | 4492                    | 2206  | 0.018 | 0.059 |
| 2-ketobutyric acid                   | 3808                   | 1975   | 2750                   | 1808  | 3284                    | 2982  | 3004                    | 1953  | 3441                    | 2562  | 0.702 | 0.766 |
| 2-hydroxyhexanoic acid               | 5604.8125 <sup>b</sup> | 14404  | 27170.125 <sup>a</sup> | 18284 | 21814.9375 <sup>a</sup> | 14887 | 4118.3125 <sup>b</sup>  | 4629  | 2798.0625 <sup>b</sup>  | 3328  | 0.000 | 0.000 |
| 2-hydroxyglutaric acid               | 1314.5625 <sup>b</sup> | 1344   | 5807.25 <sup>a</sup>   | 3834  | 6130 <sup>a</sup>       | 3529  | 1981.1875 <sup>b</sup>  | 1433  | 2254.5 <sup>b</sup>     | 2986  | 0.000 | 0.000 |
| 2-hydroxybutanoic acid               | 15445.375 <sup>b</sup> | 40335  | 63515.25 <sup>a</sup>  | 43645 | 88181.0625 <sup>a</sup> | 85418 | 11272.625 <sup>b</sup>  | 14468 | 8544.9375 <sup>b</sup>  | 7606  | 0.000 | 0.000 |
| 2-deoxytetronic acid                 | 2397.4375 <sup>a</sup> | 2323   | 528.4375 <sup>b</sup>  | 270   | 552.125 <sup>b</sup>    | 355   | 1466 <sup>ab</sup>      | 1017  | 1282.8125 <sup>ab</sup> | 842   | 0.000 | 0.001 |
| 2-deoxyerythritol                    | 4348                   | 5366   | 763                    | 396   | 3784                    | 6727  | 1293                    | 929   | 1619                    | 1743  | 0.049 | 0.122 |
| 2,4-diaminobutyric acid              | 3268                   | 2236   | 1252                   | 899   | 1743                    | 1843  | 1952                    | 1474  | 2585                    | 3098  | 0.023 | 0.072 |
| 1-monopalmitin                       | 830                    | 388    | 503                    | 395   | 723                     | 433   | 690                     | 234   | 526                     | 289   | 0.041 | 0.105 |
| 1-kestose                            | 427                    | 499    | 411                    | 432   | 343                     | 221   | 457                     | 817   | 256                     | 160   | 0.752 | 0.792 |
| 1-deoxyerythritol                    | 2690                   | 1601   | 1921                   | 2809  | 3494                    | 4817  | 1819                    | 729   | 4783                    | 10358 | 0.487 | 0.588 |
| 1,5-anhydroglucitol                  | 1062                   | 1190   | 2031                   | 1957  | 3055                    | 4276  | 2440                    | 3826  | 1572                    | 1724  | 0.181 | 0.292 |
| 2,5-dihydroxypyrazine NIST           | 873                    | 599    | 674                    | 375   | 865                     | 560   | 541                     | 235   | 573                     | 154   | 0.024 | 0.073 |
