# Supplementary material for: Effects of metronidazole on the fecal microbiome and metabolome in healthy dogs
Source: PubMed Central journal article supplement (PMC7517498; doi:10.1111/jvim.15871), 2020-08-28
Supplement: JVIM-34-1853-s007.pdf [file JVIM-34-1853-s007.pdf]

**Group 1 Summary Statistics for serum metabolomics**

| Compound name                        | day 0  |                    | day 42 |                    | p-value | q-value |
|--------------------------------------|--------|--------------------|--------|--------------------|---------|---------|
|                                      | mean   | standard deviation | mean   | standard deviation |         |         |
| xylulose NIST                        | 251    | 26                 | 270    | 47                 | 0.1982  | 0.8716  |
| xylose                               | 1277   | 357                | 1256   | 260                | 0.9229  | 0.9598  |
| xylitol                              | 351    | 111                | 309    | 55                 | 0.4119  | 0.8716  |
| xanthine                             | 778    | 168                | 731    | 287                | 0.5640  | 0.8716  |
| valine                               | 121653 | 25692              | 118763 | 28427              | 0.7562  | 0.8969  |
| uric acid                            | 785    | 260                | 627    | 229                | 0.1942  | 0.8716  |
| urea                                 | 207064 | 64365              | 140654 | 88491              | 0.0167  | 0.8716  |
| uracil                               | 429    | 137                | 341    | 183                | 0.1709  | 0.8716  |
| tyrosine                             | 36118  | 8856               | 34342  | 10348              | 0.7113  | 0.8969  |
| tryptophan                           | 81114  | 22953              | 81854  | 36107              | 0.9269  | 0.9598  |
| trans-4-hydroxyproline               | 20492  | 13502              | 16703  | 13829              | 0.5482  | 0.8716  |
| tocopherol alpha-                    | 7906   | 4097               | 7897   | 2569               | 0.9924  | 0.9924  |
| thymidine                            | 2747   | 811                | 2625   | 855                | 0.3508  | 0.8716  |
| threose                              | 446    | 123                | 365    | 155                | 0.3851  | 0.8716  |
| threonine                            | 40909  | 7012               | 36839  | 7999               | 0.2210  | 0.8716  |
| threonic acid                        | 4262   | 722                | 3789   | 664                | 0.0765  | 0.8716  |
| threitol                             | 233    | 87                 | 217    | 30                 | 0.6090  | 0.8716  |
| taurine                              | 10607  | 3557               | 8621   | 1849               | 0.0963  | 0.8716  |
| tagatose                             | 1664   | 539                | 1934   | 506                | 0.3856  | 0.8716  |
| sulfuric acid                        | 2312   | 2609               | 2158   | 1988               | 0.8974  | 0.9565  |
| sucrose                              | 212    | 233                | 140    | 106                | 0.4719  | 0.8716  |
| succinic acid                        | 934    | 216                | 855    | 150                | 0.2140  | 0.8716  |
| stearic acid                         | 267385 | 58559              | 292004 | 62126              | 0.3538  | 0.8716  |
| sorbitol                             | 795    | 412                | 1079   | 700                | 0.2518  | 0.8716  |
| serine                               | 46398  | 8571               | 43778  | 12960              | 0.4848  | 0.8716  |
| sebacic acid, di(2-octyl) ester NIST | 1629   | 299                | 1961   | 355                | 0.1127  | 0.8716  |
| saccharic acid                       | 159    | 64                 | 163    | 67                 | 0.9023  | 0.9565  |
| ribose                               | 1075   | 352                | 1045   | 338                | 0.8813  | 0.9531  |
| ribonic acid                         | 402    | 120                | 480    | 119                | 0.2255  | 0.8716  |

|                                   |        |       |        |       |        |        |
|-----------------------------------|--------|-------|--------|-------|--------|--------|
| ribitol                           | 288    | 64    | 313    | 99    | 0.5740 | 0.8716 |
| pyrophosphate                     | 150    | 66    | 199    | 145   | 0.4638 | 0.8716 |
| pseudo uridine                    | 1796   | 368   | 1750   | 138   | 0.7611 | 0.8969 |
| propane-1,3-diol NIST             | 1723   | 514   | 1641   | 271   | 0.6307 | 0.8827 |
| proline                           | 127660 | 48987 | 134349 | 75296 | 0.7640 | 0.8969 |
| pinitol                           | 184    | 149   | 538    | 758   | 0.2437 | 0.8716 |
| phosphoethanolamine               | 242    | 150   | 169    | 61    | 0.2185 | 0.8716 |
| phosphate                         | 14293  | 3330  | 13876  | 2167  | 0.7535 | 0.8969 |
| phenylethylamine                  | 1874   | 748   | 2220   | 1140  | 0.4615 | 0.8716 |
| phenylalanine                     | 18685  | 3452  | 18517  | 3553  | 0.6468 | 0.8827 |
| pelargonic acid                   | 14890  | 2092  | 15634  | 2110  | 0.5127 | 0.8716 |
| palmitoleic acid                  | 5877   | 6482  | 10325  | 12728 | 0.2557 | 0.8716 |
| palmitic acid                     | 42459  | 12366 | 46066  | 14986 | 0.4077 | 0.8716 |
| oxoproline                        | 161288 | 32532 | 149084 | 68622 | 0.6783 | 0.8922 |
| oxalic acid                       | 601    | 65    | 521    | 141   | 0.0672 | 0.8716 |
| ornithine                         | 13199  | 7198  | 11560  | 4073  | 0.4772 | 0.8716 |
| oleic acid                        | 6027   | 4722  | 9363   | 9326  | 0.2392 | 0.8716 |
| octanol NIST                      | 799    | 136   | 766    | 153   | 0.5516 | 0.8716 |
| octadecanol                       | 198    | 40    | 284    | 106   | 0.0436 | 0.8716 |
| N-methylalanine                   | 15337  | 7480  | 18198  | 8359  | 0.4583 | 0.8716 |
| N-acetylmannosamine               | 94     | 47    | 106    | 42    | 0.6688 | 0.8877 |
| n-acetylglutamate                 | 687    | 254   | 683    | 185   | 0.9734 | 0.9869 |
| N-acetyl-D-hexosamine             | 146    | 40    | 152    | 38    | 0.7975 | 0.8969 |
| myristic acid                     | 13275  | 3560  | 16259  | 5883  | 0.0881 | 0.8716 |
| myo-inositol                      | 13038  | 6027  | 10771  | 4201  | 0.5265 | 0.8716 |
| methyltetrahydrophenanthrene NIST | 1230   | 277   | 1221   | 208   | 0.9106 | 0.9565 |
| methionine sulfoxide              | 12344  | 4528  | 12805  | 3774  | 0.7935 | 0.8969 |
| methionine                        | 7253   | 4163  | 6793   | 2841  | 0.7224 | 0.8969 |
| methanolphosphate                 | 1071   | 146   | 1464   | 942   | 0.2724 | 0.8716 |
| mannose                           | 13392  | 5069  | 15899  | 4868  | 0.3593 | 0.8716 |
| maltose                           | 309    | 114   | 354    | 146   | 0.4796 | 0.8716 |
| malic acid                        | 460    | 297   | 469    | 191   | 0.8695 | 0.9474 |
| maleimide                         | 811    | 352   | 653    | 73    | 0.2496 | 0.8716 |
| lyxitol                           | 833    | 195   | 909    | 281   | 0.5593 | 0.8716 |

|                            |        |        |        |       |        |        |
|----------------------------|--------|--------|--------|-------|--------|--------|
| lysine                     | 37810  | 16692  | 27277  | 9242  | 0.0631 | 0.8716 |
| linolenic acid             | 3422   | 2523   | 2703   | 1849  | 0.2222 | 0.8716 |
| linoleic acid              | 2857   | 1992   | 3998   | 3517  | 0.1995 | 0.8716 |
| leucine                    | 95193  | 8869   | 102780 | 33076 | 0.5003 | 0.8716 |
| lauric acid                | 5786   | 2140   | 6886   | 2086  | 0.3784 | 0.8716 |
| lactic acid                | 321704 | 114560 | 298144 | 91923 | 0.6149 | 0.8716 |
| lactamide                  | 473    | 421    | 480    | 647   | 0.9813 | 0.9881 |
| ketohexose                 | 255    | 76     | 274    | 98    | 0.6630 | 0.8877 |
| isothreonic acid           | 803    | 136    | 842    | 108   | 0.5321 | 0.8716 |
| isoleucine                 | 46660  | 11892  | 45171  | 9896  | 0.8091 | 0.8969 |
| isoheptadecanoic acid NIST | 735    | 172    | 906    | 267   | 0.1075 | 0.8716 |
| isocitric acid             | 538    | 112    | 591    | 176   | 0.3073 | 0.8716 |
| inosine                    | 1250   | 715    | 1241   | 676   | 0.9492 | 0.9759 |
| indoxyl sulfate            | 418    | 175    | 287    | 204   | 0.1996 | 0.8716 |
| indole-3-lactate           | 1256   | 479    | 1302   | 774   | 0.7457 | 0.8969 |
| indole-3-acetate           | 653    | 152    | 581    | 239   | 0.3223 | 0.8716 |
| hypoxanthine               | 2371   | 1230   | 2350   | 1632  | 0.9685 | 0.9869 |
| hydroxylamine              | 45572  | 18065  | 35985  | 27155 | 0.3040 | 0.8716 |
| hydroxycarbamate NIST      | 8362   | 3680   | 6144   | 4511  | 0.2442 | 0.8716 |
| hydroquinone               | 3459   | 2390   | 2411   | 2453  | 0.2882 | 0.8716 |
| histidine                  | 3751   | 1683   | 3356   | 1006  | 0.5649 | 0.8716 |
| hexuronic acid             | 4303   | 2486   | 3711   | 3396  | 0.7179 | 0.8969 |
| hexose                     | 1310   | 643    | 1527   | 596   | 0.4412 | 0.8716 |
| hexitol                    | 506    | 277    | 455    | 226   | 0.3316 | 0.8716 |
| heptadecanoic acid         | 5060   | 1355   | 6019   | 1471  | 0.0559 | 0.8716 |
| glycolic acid              | 2279   | 864    | 1799   | 639   | 0.1643 | 0.8716 |
| glycine                    | 58874  | 35297  | 63650  | 40746 | 0.7995 | 0.8969 |
| glycerol-alpha-phosphate   | 6819   | 1394   | 6600   | 1378  | 0.6111 | 0.8716 |
| glycerol                   | 29427  | 14567  | 31712  | 17295 | 0.6530 | 0.8828 |
| glyceric acid              | 2352   | 450    | 2391   | 255   | 0.7965 | 0.8969 |
| glutamine                  | 95116  | 55735  | 108893 | 62287 | 0.7158 | 0.8969 |
| glutamic acid              | 6865   | 1705   | 7211   | 2418  | 0.6469 | 0.8827 |
| glucose-6-phosphate        | 343    | 154    | 283    | 142   | 0.4127 | 0.8716 |
| glucose                    | 253644 | 45318  | 289158 | 69314 | 0.3252 | 0.8716 |

|                                         |        |       |        |       |        |        |
|-----------------------------------------|--------|-------|--------|-------|--------|--------|
| gluconic acid                           | 137    | 31    | 144    | 52    | 0.6352 | 0.8827 |
| fumaric acid                            | 450    | 151   | 474    | 180   | 0.3430 | 0.8716 |
| fructose                                | 33966  | 10083 | 39784  | 10534 | 0.3409 | 0.8716 |
| ethanolamine                            | 995    | 140   | 1070   | 172   | 0.3176 | 0.8716 |
| erythrose                               | 225    | 40    | 238    | 29    | 0.3955 | 0.8716 |
| erythritol                              | 736    | 94    | 791    | 72    | 0.1748 | 0.8716 |
| dodecanoic acid, isopropanol ester NIST | 173    | 78    | 179    | 68    | 0.9041 | 0.9565 |
| doconexent NIST                         | 1327   | 588   | 1218   | 287   | 0.6022 | 0.8716 |
| cystine                                 | 2690   | 867   | 2947   | 928   | 0.0890 | 0.8716 |
| cysteine                                | 883    | 312   | 798    | 174   | 0.5467 | 0.8716 |
| creatinine                              | 10625  | 3383  | 9194   | 2029  | 0.0602 | 0.8716 |
| conduritol-beta-expoide                 | 584    | 94    | 791    | 468   | 0.2551 | 0.8716 |
| citrulline                              | 2072   | 827   | 2347   | 631   | 0.4127 | 0.8716 |
| citric acid                             | 29726  | 7001  | 32294  | 8036  | 0.2987 | 0.8716 |
| cholesterol                             | 131525 | 17127 | 132713 | 13260 | 0.8657 | 0.9474 |
| caprylic acid                           | 3914   | 759   | 3663   | 623   | 0.5079 | 0.8716 |
| capric acid                             | 873    | 155   | 946    | 158   | 0.3504 | 0.8716 |
| beta-glycerolphosphate                  | 194    | 43    | 220    | 92    | 0.4745 | 0.8716 |
| beta-alanine                            | 189    | 71    | 176    | 77    | 0.6966 | 0.8969 |
| benzoic acid                            | 8923   | 1168  | 6952   | 1569  | 0.0060 | 0.8716 |
| behenic acid                            | 767    | 142   | 788    | 130   | 0.7873 | 0.8969 |
| azelaic acid                            | 225    | 188   | 117    | 21    | 0.1574 | 0.8716 |
| aspartic acid                           | 1202   | 437   | 1104   | 318   | 0.5904 | 0.8716 |
| asparagine                              | 4858   | 1746  | 4459   | 1875  | 0.5301 | 0.8716 |
| arachidonic acid                        | 11843  | 3231  | 12394  | 3414  | 0.5954 | 0.8716 |
| arachidic acid                          | 2566   | 544   | 2803   | 718   | 0.4972 | 0.8716 |
| aminomalonate                           | 2335   | 747   | 1806   | 1540  | 0.3814 | 0.8716 |
| allantoic acid                          | 1200   | 252   | 1133   | 223   | 0.4928 | 0.8716 |
| alanine-alanine                         | 1342   | 554   | 1258   | 456   | 0.7348 | 0.8969 |
| alanine                                 | 285596 | 49726 | 306574 | 58049 | 0.4757 | 0.8716 |
| adipic acid                             | 489    | 165   | 388    | 158   | 0.2652 | 0.8716 |
| aconitic acid                           | 280    | 69    | 316    | 79    | 0.2270 | 0.8716 |
| acetophenone NIST                       | 1856   | 582   | 2560   | 629   | 0.1006 | 0.8716 |
| 5-methoxytryptamine                     | 345    | 214   | 393    | 159   | 0.4785 | 0.8716 |

|                                                      |       |       |       |       |        |        |
|------------------------------------------------------|-------|-------|-------|-------|--------|--------|
| 5-aminovaleric acid                                  | 351   | 107   | 309   | 90    | 0.4630 | 0.8716 |
| 4-hydroxyquinoline-2-carboxylic acid                 | 387   | 213   | 342   | 183   | 0.5001 | 0.8716 |
| 3-phosphoglycerate                                   | 135   | 40    | 122   | 45    | 0.6107 | 0.8716 |
| 3-hydroxybutyric acid                                | 2538  | 1616  | 3135  | 1985  | 0.4982 | 0.8716 |
| 2,3-dihydroxybutanoic acid NIST                      | 183   | 40    | 147   | 79    | 0.1097 | 0.8716 |
| 2-ketoisocaproic acid                                | 2374  | 1442  | 2066  | 321   | 0.5897 | 0.8716 |
| 2-hydroxyvaleric acid                                | 1219  | 410   | 1191  | 243   | 0.8109 | 0.8969 |
| 2-hydroxypyrazinyl-2-propenoic acid ethyl ester NIST | 781   | 307   | 570   | 324   | 0.1479 | 0.8716 |
| 2-hydroxyglutaric acid                               | 307   | 130   | 443   | 346   | 0.3616 | 0.8716 |
| 2-hydroxybutanoic acid                               | 11559 | 8311  | 12702 | 7435  | 0.4818 | 0.8716 |
| 2-deoxytetronic acid                                 | 281   | 75    | 348   | 57    | 0.0964 | 0.8716 |
| 1,5-anhydroglucitol                                  | 30423 | 11335 | 31415 | 14161 | 0.7348 | 0.8969 |
| 1-monostearin                                        | 350   | 142   | 335   | 87    | 0.7854 | 0.8969 |
| 1-monopalmitin                                       | 355   | 152   | 377   | 162   | 0.7054 | 0.8969 |
| 1-monoolein                                          | 534   | 128   | 649   | 293   | 0.2263 | 0.8716 |

---

p-values adjusted by Benjamini and Hochberg FDR
