# Supplementary material for: Effects of metronidazole on the fecal microbiome and metabolome in healthy dogs
Source: PubMed Central journal article supplement (PMC7517498; doi:10.1111/jvim.15871), 2020-08-28
Supplement: JVIM-34-1853-s008.pdf [file JVIM-34-1853-s008.pdf]

**Group 2 diet Summary Statistics for serum metabolomics**

| Compound name                        | day 0  |                    | day 42 |                    | p-value | q-value |
|--------------------------------------|--------|--------------------|--------|--------------------|---------|---------|
|                                      | mean   | standard deviation | mean   | standard deviation |         |         |
| xylulose NIST                        | 224    | 35                 | 274    | 98                 | 0.1794  | 0.5136  |
| xylose                               | 1161   | 185                | 1146   | 345                | 0.9217  | 0.9822  |
| xylitol                              | 294    | 84                 | 280    | 89                 | 0.6337  | 0.8641  |
| xanthine                             | 714    | 178                | 641    | 340                | 0.4902  | 0.7952  |
| valine                               | 111466 | 30099              | 125211 | 26638              | 0.4153  | 0.7394  |
| uric acid                            | 896    | 261                | 639    | 199                | 0.069   | 0.3713  |
| urea                                 | 161390 | 46196              | 169443 | 34755              | 0.7599  | 0.9245  |
| uracil                               | 338    | 76                 | 459    | 480                | 0.4605  | 0.7836  |
| tyrosine                             | 27664  | 4605               | 41845  | 17765              | 0.034   | 0.3189  |
| tryptophan                           | 80168  | 25270              | 99206  | 26540              | 0.0523  | 0.3189  |
| trans-4-hydroxyproline               | 12476  | 4979               | 14687  | 22960              | 0.8125  | 0.9367  |
| tocopherol alpha-                    | 7105   | 3030               | 5498   | 2318               | 0.0178  | 0.3147  |
| thymidine                            | 2525   | 1330               | 2116   | 635                | 0.2284  | 0.5955  |
| threose                              | 346    | 186                | 402    | 101                | 0.4863  | 0.7952  |
| threonine                            | 34939  | 8718               | 39353  | 11552              | 0.0886  | 0.4079  |
| threonic acid                        | 4572   | 1066               | 3405   | 783                | 0.0013  | 0.1241  |
| threitol                             | 234    | 49                 | 222    | 52                 | 0.6292  | 0.8641  |
| taurine                              | 8880   | 2504               | 8292   | 2871               | 0.5769  | 0.8240  |
| tagatose                             | 1605   | 405                | 1959   | 391                | 0.0765  | 0.3851  |
| sulfuric acid                        | 3753   | 4063               | 1997   | 1255               | 0.317   | 0.6340  |
| sucrose                              | 107    | 51                 | 84     | 38                 | 0.2874  | 0.6111  |
| succinic acid                        | 953    | 256                | 947    | 295                | 0.9296  | 0.9826  |
| stearic acid                         | 251606 | 67436              | 244036 | 35580              | 0.7762  | 0.9289  |
| sorbitol                             | 1105   | 304                | 773    | 357                | 0.0527  | 0.3189  |
| serine                               | 34598  | 6932               | 43124  | 15855              | 0.0986  | 0.4113  |
| sebacic acid, di(2-octyl) ester NIST | 1752   | 515                | 1802   | 512                | 0.749   | 0.9245  |
| saccharic acid                       | 120    | 32                 | 155    | 40                 | 0.0804  | 0.3913  |
| ribose                               | 642    | 304                | 1256   | 666                | 0.0127  | 0.3147  |
| ribonic acid                         | 336    | 158                | 333    | 150                | 0.9392  | 0.9826  |

|                                   |        |       |        |       |        |        |
|-----------------------------------|--------|-------|--------|-------|--------|--------|
| ribitol                           | 271    | 79    | 286    | 54    | 0.66   | 0.8760 |
| pyrophosphate                     | 165    | 74    | 171    | 62    | 0.6412 | 0.8641 |
| pseudo uridine                    | 1689   | 415   | 1931   | 401   | 0.0516 | 0.3189 |
| propane-1,3-diol NIST             | 2278   | 1179  | 1687   | 457   | 0.1059 | 0.4295 |
| proline                           | 92145  | 27247 | 120847 | 66550 | 0.2222 | 0.5898 |
| pinitol                           | 248    | 212   | 245    | 308   | 0.9807 | 0.9943 |
| phosphoethanolamine               | 144    | 58    | 199    | 139   | 0.2683 | 0.6111 |
| phosphate                         | 12320  | 3524  | 10746  | 2559  | 0.2922 | 0.6111 |
| phenylethylamine                  | 2516   | 830   | 4268   | 1981  | 0.0194 | 0.3147 |
| phenylalanine                     | 17041  | 3701  | 18597  | 3563  | 0.2982 | 0.6132 |
| pelargonic acid                   | 16010  | 3622  | 16398  | 2366  | 0.7003 | 0.9114 |
| palmitoleic acid                  | 8160   | 3959  | 6054   | 6267  | 0.2352 | 0.6006 |
| palmitic acid                     | 42998  | 12664 | 38970  | 9442  | 0.4749 | 0.7879 |
| oxoproline                        | 188434 | 49559 | 164625 | 83125 | 0.2028 | 0.5534 |
| oxalic acid                       | 584    | 260   | 505    | 132   | 0.3957 | 0.7394 |
| ornithine                         | 10741  | 3298  | 14182  | 3239  | 0.0365 | 0.3189 |
| oleic acid                        | 9755   | 5362  | 6046   | 5643  | 0.1581 | 0.4827 |
| octanol NIST                      | 846    | 247   | 857    | 140   | 0.9141 | 0.9813 |
| octadecanol                       | 180    | 44    | 244    | 108   | 0.162  | 0.4827 |
| N-methylalanine                   | 16293  | 6519  | 11636  | 10948 | 0.2741 | 0.6111 |
| N-acetylmannosamine               | 94     | 37    | 96     | 43    | 0.9008 | 0.9813 |
| n-acetylglutamate                 | 765    | 372   | 637    | 386   | 0.5159 | 0.7972 |
| N-acetyl-D-hexosamine             | 139    | 35    | 146    | 54    | 0.803  | 0.9367 |
| myristic acid                     | 13568  | 3757  | 14078  | 3163  | 0.7679 | 0.9266 |
| myo-inositol                      | 10873  | 2909  | 9291   | 4775  | 0.4109 | 0.7394 |
| methyltetrahydrophenanthrene NIST | 1104   | 352   | 1027   | 224   | 0.2812 | 0.6111 |
| methionine sulfoxide              | 9205   | 4104  | 11753  | 4005  | 0.1343 | 0.4669 |
| methionine                        | 6647   | 1843  | 3973   | 1875  | 0.0392 | 0.3189 |
| methanolphosphate                 | 954    | 366   | 1171   | 910   | 0.5332 | 0.8029 |
| mannose                           | 14446  | 5440  | 14038  | 3428  | 0.8006 | 0.9367 |
| maltose                           | 210    | 111   | 250    | 84    | 0.1618 | 0.4827 |
| malic acid                        | 540    | 181   | 511    | 244   | 0.5634 | 0.8144 |
| maleimide                         | 714    | 174   | 669    | 217   | 0.6146 | 0.8546 |
| lyxitol                           | 793    | 263   | 663    | 128   | 0.3078 | 0.6242 |

|                            |        |        |        |        |        |        |
|----------------------------|--------|--------|--------|--------|--------|--------|
| lysine                     | 28575  | 13428  | 31691  | 10434  | 0.4071 | 0.7394 |
| linolenic acid             | 4114   | 1957   | 3039   | 848    | 0.1574 | 0.4827 |
| linoleic acid              | 3839   | 1054   | 3052   | 1864   | 0.293  | 0.6111 |
| leucine                    | 85094  | 11973  | 84398  | 24474  | 0.9499 | 0.9826 |
| lauric acid                | 6443   | 1616   | 10009  | 3467   | 0.022  | 0.3189 |
| lactic acid                | 452065 | 227307 | 249486 | 130071 | 0.0039 | 0.1606 |
| lactamide                  | 823    | 897    | 402    | 337    | 0.1447 | 0.4827 |
| ketohexose                 | 271    | 92     | 302    | 67     | 0.4111 | 0.7394 |
| isothreonic acid           | 833    | 241    | 762    | 127    | 0.4555 | 0.7836 |
| isoleucine                 | 40976  | 8287   | 49634  | 10714  | 0.1541 | 0.4827 |
| isoheptadecanoic acid NIST | 918    | 406    | 669    | 159    | 0.0957 | 0.4109 |
| isocitric acid             | 616    | 180    | 656    | 239    | 0.4563 | 0.7836 |
| inosine                    | 854    | 415    | 1396   | 637    | 0.0712 | 0.3713 |
| indoxyl sulfate            | 217    | 123    | 250    | 113    | 0.5016 | 0.7972 |
| indole-3-lactate           | 1222   | 407    | 1178   | 610    | 0.7275 | 0.9114 |
| indole-3-acetate           | 555    | 192    | 620    | 189    | 0.2912 | 0.6111 |
| hypoxanthine               | 2794   | 966    | 2972   | 2633   | 0.8469 | 0.9367 |
| hydroxylamine              | 38189  | 24679  | 42378  | 21294  | 0.7095 | 0.9114 |
| hydroxycarbamate NIST      | 7571   | 5350   | 7577   | 4501   | 0.998  | 0.9980 |
| hydroquinone               | 1576   | 1412   | 1413   | 881    | 0.546  | 0.8029 |
| histidine                  | 3270   | 1161   | 3837   | 935    | 0.1253 | 0.4619 |
| hexuronic acid             | 3573   | 2411   | 3683   | 2731   | 0.9076 | 0.9813 |
| hexose                     | 1401   | 393    | 1599   | 488    | 0.3622 | 0.7051 |
| hexitol                    | 688    | 221    | 398    | 136    | 0.0017 | 0.1241 |
| heptadecanoic acid         | 6181   | 2296   | 4317   | 1247   | 0.0445 | 0.3189 |
| glycolic acid              | 1934   | 701    | 2684   | 473    | 0.0894 | 0.4079 |
| glycine                    | 55149  | 27607  | 54818  | 26821  | 0.9598 | 0.9826 |
| glycerol-alpha-phosphate   | 5992   | 2452   | 5891   | 1977   | 0.8153 | 0.9367 |
| glycerol                   | 28199  | 7611   | 28426  | 17008  | 0.9624 | 0.9826 |
| glyceric acid              | 2457   | 580    | 2380   | 851    | 0.8436 | 0.9367 |
| glutamine                  | 74439  | 31909  | 132092 | 69380  | 0.015  | 0.3147 |
| glutamic acid              | 7741   | 1388   | 11141  | 4989   | 0.1229 | 0.4619 |
| glucose-6-phosphate        | 256    | 173    | 331    | 119    | 0.2658 | 0.6111 |
| glucose                    | 247953 | 50873  | 305969 | 58897  | 0.0186 | 0.3147 |

|                                         |        |        |        |       |        |        |
|-----------------------------------------|--------|--------|--------|-------|--------|--------|
| gluconic acid                           | 114    | 58     | 163    | 57    | 0.1297 | 0.4619 |
| fumaric acid                            | 516    | 88     | 421    | 134   | 0.0371 | 0.3189 |
| fructose                                | 32933  | 9089   | 40175  | 7807  | 0.0931 | 0.4109 |
| ethanolamine                            | 836    | 134    | 888    | 234   | 0.6451 | 0.8641 |
| erythrose                               | 222    | 70     | 209    | 25    | 0.5499 | 0.8029 |
| erythritol                              | 819    | 193    | 735    | 135   | 0.1758 | 0.5133 |
| dodecanoic acid, isopropanol ester NIST | 136    | 60     | 159    | 42    | 0.2808 | 0.6111 |
| doconexent NIST                         | 1281   | 840    | 1118   | 672   | 0.3355 | 0.6619 |
| cystine                                 | 2957   | 686    | 3319   | 1083  | 0.2731 | 0.6111 |
| cysteine                                | 932    | 360    | 1015   | 464   | 0.5813 | 0.8240 |
| creatinine                              | 8555   | 2226   | 8033   | 2649  | 0.7212 | 0.9114 |
| conduritol-beta-expoxide                | 647    | 229    | 446    | 172   | 0.0286 | 0.3189 |
| citrulline                              | 1972   | 434    | 3108   | 1532  | 0.0268 | 0.3189 |
| citric acid                             | 33054  | 9501   | 33929  | 11329 | 0.6974 | 0.9114 |
| cholesterol                             | 107336 | 29450  | 110296 | 22683 | 0.541  | 0.8029 |
| caprylic acid                           | 3857   | 1005   | 3973   | 745   | 0.8033 | 0.9367 |
| capric acid                             | 885    | 138    | 1036   | 263   | 0.0652 | 0.3661 |
| beta-glycerolphosphate                  | 180    | 42     | 178    | 67    | 0.9522 | 0.9826 |
| beta-alanine                            | 126    | 34     | 182    | 73    | 0.0543 | 0.3189 |
| benzoic acid                            | 7407   | 1904   | 7238   | 1475  | 0.8456 | 0.9367 |
| behenic acid                            | 820    | 201    | 859    | 135   | 0.6067 | 0.8517 |
| azelaic acid                            | 119    | 49     | 122    | 22    | 0.882  | 0.9682 |
| aspartic acid                           | 1194   | 427    | 1160   | 383   | 0.7275 | 0.9114 |
| asparagine                              | 3753   | 884    | 6046   | 2730  | 0.0424 | 0.3189 |
| arachidonic acid                        | 11494  | 2883   | 10599  | 2827  | 0.5109 | 0.7972 |
| arachidic acid                          | 2211   | 602    | 2614   | 321   | 0.1188 | 0.4619 |
| aminomalonate                           | 1832   | 845    | 1927   | 861   | 0.8237 | 0.9367 |
| allantoic acid                          | 1103   | 385    | 995    | 295   | 0.4616 | 0.7836 |
| alanine-alanine                         | 1403   | 284    | 1705   | 949   | 0.3861 | 0.7394 |
| alanine                                 | 366267 | 192403 | 367450 | 81172 | 0.9882 | 0.9950 |
| adipic acid                             | 383    | 128    | 470    | 76    | 0.2047 | 0.5534 |
| aconitic acid                           | 251    | 67     | 286    | 89    | 0.5086 | 0.7972 |
| acetophenone NIST                       | 1922   | 660    | 2414   | 1469  | 0.2713 | 0.6111 |
| 5-methoxytryptamine                     | 351    | 177    | 499    | 320   | 0.2386 | 0.6006 |

|                                                      |       |      |       |      |        |        |
|------------------------------------------------------|-------|------|-------|------|--------|--------|
| 5-aminovaleric acid                                  | 268   | 75   | 295   | 85   | 0.5457 | 0.8029 |
| 4-hydroxyquinoline-2-carboxylic acid                 | 274   | 180  | 375   | 161  | 0.1284 | 0.4619 |
| 3-phosphoglycerate                                   | 107   | 48   | 114   | 35   | 0.7304 | 0.9114 |
| 3-hydroxybutyric acid                                | 2644  | 857  | 2308  | 1357 | 0.3927 | 0.7394 |
| 2,3-dihydroxybutanoic acid NIST                      | 164   | 44   | 175   | 46   | 0.5187 | 0.7972 |
| 2-ketoisocaproic acid                                | 3205  | 2630 | 2469  | 1459 | 0.1491 | 0.4827 |
| 2-hydroxyvaleric acid                                | 1168  | 305  | 1062  | 450  | 0.4728 | 0.7879 |
| 2-hydroxypyrazinyl-2-propenoic acid ethyl ester NIST | 631   | 346  | 663   | 277  | 0.8349 | 0.9367 |
| 2-hydroxyglutaric acid                               | 272   | 148  | 118   | 60   | 0.0407 | 0.3189 |
| 2-hydroxybutanoic acid                               | 13371 | 8193 | 7098  | 5216 | 0.0546 | 0.3189 |
| 2-deoxytetronic acid                                 | 361   | 92   | 295   | 100  | 0.0044 | 0.1606 |
| 1,5-anhydroglucitol                                  | 26977 | 7488 | 34451 | 7585 | 0.0345 | 0.3189 |
| 1-monostearin                                        | 339   | 101  | 286   | 87   | 0.2919 | 0.6111 |
| 1-monopalmitin                                       | 248   | 157  | 275   | 137  | 0.7593 | 0.9245 |
| 1-monoolein                                          | 499   | 96   | 427   | 109  | 0.1832 | 0.5144 |

---

p-values adjusted by Benjamini and Hochberg FDR
