# Supplementary material for: Effects of metronidazole on the fecal microbiome and metabolome in healthy dogs
Source: PubMed Central journal article supplement (PMC7517498; doi:10.1111/jvim.15871), 2020-08-28
Supplement: JVIM-34-1853-s009.pdf [file JVIM-34-1853-s009.pdf]

**Group 2 metronidazole and Group 3 Combined Summary Statistics for serum metabolomics**

| Compound Name                        | day 0                |                    | day 14                |                    | day 42               |                    | p-value | q-value |
|--------------------------------------|----------------------|--------------------|-----------------------|--------------------|----------------------|--------------------|---------|---------|
|                                      | mean                 | standard deviation | mean                  | standard deviation | mean                 | standard deviation |         |         |
| xylulose NIST                        | 236                  | 95                 | 233                   | 68                 | 236                  | 67                 | 0.986   | 0.987   |
| xylose                               | 1198                 | 288                | 1193                  | 217                | 1208                 | 304                | 0.982   | 0.987   |
| xylitol                              | 301                  | 108                | 277                   | 66                 | 270                  | 81                 | 0.258   | 0.734   |
| xanthine                             | 685                  | 263                | 791                   | 164                | 783                  | 281                | 0.264   | 0.734   |
| valine                               | 130290               | 31480              | 125188                | 24384              | 126148               | 21064              | 0.735   | 0.925   |
| uric acid                            | 723                  | 214                | 781                   | 245                | 692                  | 161                | 0.313   | 0.776   |
| urea                                 | 165576               | 55953              | 164144                | 53849              | 178157               | 58248              | 0.699   | 0.907   |
| uracil                               | 427                  | 352                | 377                   | 109                | 372                  | 178                | 0.714   | 0.913   |
| tyrosine                             | 37539                | 13410              | 42459                 | 14346              | 35056                | 8370               | 0.049   | 0.422   |
| tryptophan                           | 94000                | 21854              | 91724                 | 29460              | 93617                | 31886              | 0.900   | 0.968   |
| trans-4-hydroxyproline               | 17796                | 18076              | 9526                  | 4270               | 20206                | 22640              | 0.058   | 0.424   |
| tocopherol alpha-                    | 5369                 | 1908               | 6220                  | 2216               | 5149                 | 2068               | 0.008   | 0.181   |
| thymidine                            | 2638                 | 1090               | 2670                  | 873                | 2501                 | 1362               | 0.573   | 0.873   |
| threose                              | 378                  | 105                | 424                   | 116                | 363                  | 146                | 0.388   | 0.810   |
| threonine                            | 41526                | 10982              | 42310                 | 8466               | 40850                | 11062              | 0.600   | 0.873   |
| threonic acid                        | 4052                 | 1066               | 3617                  | 804                | 3403                 | 1455               | 0.112   | 0.511   |
| threitol                             | 236                  | 100                | 246                   | 77                 | 261                  | 98                 | 0.634   | 0.876   |
| taurine                              | 8656                 | 2634               | 7927                  | 2208               | 9893                 | 3851               | 0.087   | 0.438   |
| tagatose                             | 1785                 | 382                | 1630                  | 522                | 1599                 | 714                | 0.418   | 0.823   |
| sulfuric acid                        | 2110                 | 1498               | 871                   | 672                | 1162                 | 1468               | 0.034   | 0.407   |
| sucrose                              | 116                  | 71                 | 106                   | 85                 | 98                   | 73                 | 0.815   | 0.952   |
| succinic acid                        | 933                  | 257                | 895                   | 194                | 891                  | 213                | 0.826   | 0.952   |
| stearic acid                         | 230003               | 41026              | 239202                | 63104              | 225371               | 49831              | 0.755   | 0.934   |
| sorbitol                             | 944                  | 387                | 751                   | 376                | 1119                 | 650                | 0.075   | 0.438   |
| serine                               | 40942                | 12382              | 42090                 | 9158               | 41797                | 12936              | 0.891   | 0.968   |
| sebacic acid, di(2-octyl) ester NIST | 1591                 | 438                | 1841                  | 423                | 1658                 | 488                | 0.187   | 0.734   |
| saccharic acid                       | 169                  | 71                 | 136                   | 51                 | 155                  | 74                 | 0.141   | 0.590   |
| ribose                               | 1121                 | 569                | 1261                  | 471                | 1149                 | 465                | 0.447   | 0.826   |
| ribonic acid                         | 337.875 <sup>b</sup> | 111                | 989.6875 <sup>a</sup> | 589                | 363.375 <sup>b</sup> | 126                | 0.000   | 0.000   |

|                                     |        |       |        |       |        |       |       |       |
|-------------------------------------|--------|-------|--------|-------|--------|-------|-------|-------|
| ribitol                             | 286    | 53    | 277    | 89    | 261    | 67    | 0.610 | 0.873 |
| pyrophosphate                       | 190    | 73    | 147    | 58    | 162    | 56    | 0.074 | 0.438 |
| pseudo uridine                      | 1851   | 459   | 1791   | 498   | 1759   | 622   | 0.542 | 0.873 |
| propane-1,3-diol NIST               | 1677   | 476   | 1730   | 531   | 1812   | 776   | 0.702 | 0.907 |
| proline                             | 125651 | 50796 | 103658 | 47641 | 139321 | 87608 | 0.085 | 0.438 |
| pinitol                             | 323    | 447   | 243    | 338   | 268    | 435   | 0.372 | 0.799 |
| phosphoethanolamine                 | 213    | 122   | 175    | 94    | 175    | 95    | 0.429 | 0.823 |
| phosphate                           | 11067  | 2545  | 12328  | 2212  | 10734  | 2618  | 0.049 | 0.422 |
| phenylethylamine                    | 3256   | 1768  | 3144   | 1666  | 3169   | 1314  | 0.958 | 0.987 |
| phenylalanine                       | 17281  | 2945  | 18403  | 3174  | 17612  | 3028  | 0.250 | 0.734 |
| pelargonic acid                     | 15263  | 2692  | 15727  | 2578  | 15579  | 2681  | 0.833 | 0.952 |
| palmitoleic acid                    | 6020   | 4436  | 10504  | 10619 | 5729   | 5433  | 0.126 | 0.556 |
| palmitic acid                       | 38060  | 8054  | 42457  | 14564 | 36719  | 11616 | 0.348 | 0.781 |
| oxoproline                          | 157864 | 66687 | 155763 | 56107 | 146233 | 53329 | 0.824 | 0.952 |
| oxalic acid                         | 567    | 143   | 480    | 111   | 478    | 231   | 0.264 | 0.734 |
| ornithine                           | 14618  | 3251  | 12546  | 2706  | 14082  | 4133  | 0.201 | 0.734 |
| oleic acid                          | 6003   | 4090  | 9037   | 8123  | 5854   | 3777  | 0.196 | 0.734 |
| octanol NIST                        | 797    | 160   | 824    | 170   | 775    | 173   | 0.581 | 0.873 |
| octadecanol                         | 212    | 94    | 255    | 73    | 236    | 78    | 0.353 | 0.781 |
| N-methylalanine                     | 16030  | 11801 | 14009  | 8086  | 13051  | 5890  | 0.470 | 0.847 |
| N-acetylmannosamine                 | 100    | 39    | 110    | 43    | 99     | 46    | 0.650 | 0.876 |
| n-acetylglutamate                   | 660    | 352   | 806    | 360   | 590    | 305   | 0.139 | 0.590 |
| N-acetyl-D-hexosamine               | 135    | 46    | 157    | 35    | 165    | 117   | 0.435 | 0.823 |
| myristic acid                       | 11445  | 3512  | 16181  | 10232 | 13221  | 4701  | 0.068 | 0.438 |
| myo-inositol                        | 12465  | 6873  | 12227  | 7310  | 11848  | 7219  | 0.901 | 0.968 |
| methyltetrahydrophenanthrenone NIST | 1030   | 205   | 1278   | 329   | 1032   | 282   | 0.018 | 0.259 |
| methionine sulfoxide                | 11213  | 4198  | 11149  | 4236  | 14277  | 5768  | 0.054 | 0.423 |
| methionine                          | 6411   | 3194  | 5867   | 3295  | 6756   | 4342  | 0.719 | 0.913 |
| methanolphosphate                   | 1068   | 793   | 1099   | 358   | 942    | 364   | 0.658 | 0.876 |
| mannose                             | 13362  | 2687  | 13658  | 3859  | 13130  | 4109  | 0.885 | 0.968 |
| maltose                             | 254    | 96    | 258    | 114   | 246    | 83    | 0.916 | 0.969 |
| malic acid                          | 459    | 186   | 512    | 186   | 460    | 183   | 0.467 | 0.847 |
| maleimide                           | 736    | 259   | 777    | 167   | 1834   | 3585  | 0.251 | 0.734 |
| lyxitol                             | 953    | 412   | 717    | 239   | 838    | 210   | 0.070 | 0.438 |

|                            |                       |        |                   |        |                  |        |       |       |
|----------------------------|-----------------------|--------|-------------------|--------|------------------|--------|-------|-------|
| lysine                     | 36086                 | 12295  | 31212             | 11464  | 33150            | 10270  | 0.251 | 0.734 |
| linolenic acid             | 3575                  | 1288   | 4073              | 2420   | 3073             | 1761   | 0.266 | 0.734 |
| linoleic acid              | 3246                  | 1479   | 4213              | 2246   | 3465             | 2077   | 0.279 | 0.754 |
| leucine                    | 96741                 | 25192  | 88881             | 30560  | 93640            | 27193  | 0.504 | 0.848 |
| lauric acid                | 7351                  | 3754   | 10149             | 8828   | 8081             | 4357   | 0.204 | 0.734 |
| lactic acid                | 282295                | 133967 | 342710            | 153882 | 326558           | 185633 | 0.313 | 0.776 |
| lactamide                  | 409                   | 348    | 442               | 360    | 637              | 1054   | 0.597 | 0.873 |
| ketohexose                 | 286                   | 60     | 278               | 100    | 253              | 117    | 0.423 | 0.823 |
| isothreononic acid         | 749.8125 <sup>b</sup> | 140    | 1478 <sup>a</sup> | 536    | 798 <sup>b</sup> | 266    | 0.000 | 0.000 |
| isoleucine                 | 49564                 | 9521   | 49618             | 9416   | 47213            | 9184   | 0.627 | 0.876 |
| isoheptadecanoic acid NIST | 578                   | 158    | 697               | 314    | 621              | 160    | 0.265 | 0.734 |
| isocitric acid             | 661                   | 218    | 662               | 199    | 618              | 270    | 0.660 | 0.876 |
| inosine                    | 1321                  | 555    | 1168              | 785    | 982              | 429    | 0.087 | 0.438 |
| indoxyl sulfate            | 223                   | 164    | 230               | 153    | 218              | 109    | 0.967 | 0.987 |
| indole-3-lactate           | 1066                  | 470    | 1194              | 547    | 1124             | 570    | 0.491 | 0.848 |
| indole-3-acetate           | 619                   | 177    | 577               | 360    | 703              | 294    | 0.353 | 0.781 |
| hypoxanthine               | 2728                  | 2107   | 2522              | 1471   | 2486             | 943    | 0.798 | 0.952 |
| hydroxylamine              | 40856                 | 19774  | 33792             | 21975  | 33247            | 23658  | 0.566 | 0.873 |
| hydroxycarbamate NIST      | 7163                  | 3970   | 6049              | 4201   | 5793             | 3974   | 0.636 | 0.876 |
| hydroquinone               | 2165                  | 2131   | 322               | 147    | 1727             | 2819   | 0.055 | 0.423 |
| histidine                  | 4363                  | 1228   | 3904              | 1037   | 4195             | 1014   | 0.400 | 0.811 |
| hexuronic acid             | 4240                  | 2892   | 3978              | 2800   | 4120             | 4701   | 0.961 | 0.987 |
| hexose                     | 1415                  | 522    | 1378              | 491    | 1345             | 621    | 0.910 | 0.969 |
| hexitol                    | 529                   | 274    | 498               | 363    | 573              | 340    | 0.335 | 0.781 |
| heptadecanoic acid         | 3990                  | 1015   | 4456              | 1626   | 3996             | 1006   | 0.494 | 0.848 |
| glycolic acid              | 2274                  | 643    | 2338              | 894    | 1555             | 614    | 0.008 | 0.181 |
| glycine                    | 53636                 | 26949  | 55163             | 22873  | 71065            | 48373  | 0.261 | 0.734 |
| glycerol-alpha-phosphate   | 6926                  | 1824   | 7286              | 2419   | 6823             | 1844   | 0.567 | 0.873 |
| glycerol                   | 28195                 | 12293  | 36221             | 17647  | 34827            | 40571  | 0.648 | 0.876 |
| glyceric acid              | 2395                  | 671    | 3030              | 674    | 2805             | 878    | 0.012 | 0.211 |
| glutamine                  | 119048                | 59589  | 92287             | 38479  | 129520           | 73049  | 0.190 | 0.734 |
| glutamic acid              | 9880                  | 3806   | 9053              | 2229   | 9323             | 4155   | 0.779 | 0.952 |
| glucose-6-phosphate        | 324                   | 177    | 374               | 223    | 400              | 380    | 0.598 | 0.873 |
| glucose                    | 306761                | 55609  | 289363            | 53895  | 282066           | 78997  | 0.328 | 0.781 |

|                                         |                        |       |                        |        |                         |        |       |       |
|-----------------------------------------|------------------------|-------|------------------------|--------|-------------------------|--------|-------|-------|
| gluconic acid                           | 140                    | 57    | 218                    | 113    | 133                     | 52     | 0.009 | 0.181 |
| fumaric acid                            | 431                    | 97    | 503                    | 127    | 448                     | 106    | 0.112 | 0.511 |
| fructose                                | 37609                  | 7168  | 34472                  | 10246  | 35132                   | 11765  | 0.440 | 0.823 |
| ethanolamine                            | 915.6875 <sup>b</sup>  | 192   | 4524.6875 <sup>a</sup> | 3463   | 1037.5 <sup>b</sup>     | 539    | 0.000 | 0.001 |
| erythrose                               | 207                    | 33    | 199                    | 31     | 216                     | 62     | 0.579 | 0.873 |
| erythritol                              | 823                    | 158   | 771                    | 176    | 828                     | 226    | 0.484 | 0.848 |
| dodecanoic acid, isopropanol ester NIST | 153                    | 44    | 152                    | 40     | 156                     | 49     | 0.951 | 0.987 |
| doconexent NIST                         | 1101                   | 507   | 1121                   | 408    | 1084                    | 585    | 0.891 | 0.968 |
| cystine                                 | 3182                   | 956   | 2870                   | 787    | 2768                    | 1269   | 0.262 | 0.734 |
| cysteine                                | 987                    | 375   | 1011                   | 488    | 941                     | 320    | 0.832 | 0.952 |
| creatinine                              | 9329                   | 2889  | 10666                  | 3799   | 9959                    | 2789   | 0.322 | 0.781 |
| conduritol-beta-expoxide                | 580                    | 286   | 507                    | 187    | 540                     | 304    | 0.410 | 0.820 |
| citrulline                              | 2890                   | 1198  | 2521                   | 636    | 3029                    | 1272   | 0.312 | 0.776 |
| citric acid                             | 35503                  | 10203 | 33977                  | 9959   | 34867                   | 15295  | 0.864 | 0.963 |
| cholesterol                             | 105660.25 <sup>a</sup> | 20712 | 111740.75 <sup>a</sup> | 29048  | 94568.5625 <sup>b</sup> | 21791  | 0.001 | 0.042 |
| caprylic acid                           | 3798                   | 820   | 3980                   | 658    | 3913                    | 803    | 0.644 | 0.876 |
| capric acid                             | 913                    | 244   | 996                    | 238    | 923                     | 173    | 0.352 | 0.781 |
| beta-glycerolphosphate                  | 198                    | 57    | 208                    | 88     | 210                     | 74     | 0.862 | 0.963 |
| beta-alanine                            | 189                    | 72    | 155                    | 47     | 152                     | 54     | 0.097 | 0.474 |
| benzoic acid                            | 7158                   | 1469  | 11415                  | 13528  | 7019                    | 1286   | 0.235 | 0.734 |
| behenic acid                            | 767                    | 155   | 856                    | 189    | 711                     | 154    | 0.071 | 0.438 |
| azelaic acid                            | 124                    | 24    | 113                    | 36     | 102                     | 48     | 0.266 | 0.734 |
| aspartic acid                           | 1085                   | 338   | 1258                   | 473    | 1485                    | 1355   | 0.365 | 0.795 |
| asparagine                              | 5337                   | 2041  | 4646                   | 1646   | 5037                    | 2466   | 0.506 | 0.848 |
| arachidonic acid                        | 12380                  | 3537  | 12405                  | 3564   | 12069                   | 3743   | 0.798 | 0.952 |
| arachidic acid                          | 2333                   | 467   | 2414                   | 661    | 2213                    | 471    | 0.594 | 0.873 |
| aminomalonate                           | 1949                   | 828   | 1591                   | 738    | 1971                    | 999    | 0.302 | 0.776 |
| allantoic acid                          | 1169                   | 484   | 1092                   | 372    | 1280                    | 835    | 0.295 | 0.776 |
| alanine-alanine                         | 1468                   | 728   | 1711                   | 638    | 1227                    | 783    | 0.037 | 0.407 |
| alanine                                 | 355581                 | 69205 | 349593                 | 101388 | 332294                  | 101799 | 0.605 | 0.873 |
| adipic acid                             | 438                    | 118   | 417                    | 90     | 396                     | 100    | 0.595 | 0.873 |
| aconitic acid                           | 292                    | 76    | 329                    | 107    | 310                     | 93     | 0.378 | 0.801 |
| acetophenone NIST                       | 2205                   | 1138  | 2811                   | 1053   | 2268                    | 780    | 0.215 | 0.734 |
| 5-methoxytryptamine                     | 446                    | 256   | 479                    | 350    | 445                     | 313    | 0.941 | 0.987 |

|                                                      |       |      |       |      |       |      |       |       |
|------------------------------------------------------|-------|------|-------|------|-------|------|-------|-------|
| 5-aminovaleric acid                                  | 421   | 341  | 290   | 88   | 545   | 341  | 0.020 | 0.259 |
| 4-hydroxyquinoline-2-carboxylic acid                 | 280   | 156  | 303   | 210  | 285   | 182  | 0.835 | 0.952 |
| 3-phosphoglycerate                                   | 116   | 39   | 119   | 44   | 141   | 127  | 0.535 | 0.873 |
| 3-hydroxybutyric acid                                | 2637  | 1134 | 2654  | 843  | 1872  | 805  | 0.014 | 0.220 |
| 2,3-dihydroxybutanoic acid NIST                      | 176   | 45   | 167   | 61   | 165   | 74   | 0.755 | 0.934 |
| 2-ketoisocaproic acid                                | 3142  | 1559 | 2464  | 1389 | 2403  | 1209 | 0.045 | 0.422 |
| 2-hydroxyvaleric acid                                | 1153  | 425  | 1132  | 253  | 1145  | 482  | 0.987 | 0.987 |
| 2-hydroxypyrazinyl-2-propenoic acid ethyl ester NIST | 680   | 277  | 624   | 307  | 578   | 352  | 0.673 | 0.885 |
| 2-hydroxyglutaric acid                               | 255   | 257  | 354   | 313  | 246   | 210  | 0.039 | 0.407 |
| 2-hydroxybutanoic acid                               | 9885  | 5773 | 8408  | 4390 | 8808  | 4598 | 0.600 | 0.873 |
| 2-deoxytetronic acid                                 | 296   | 72   | 344   | 104  | 287   | 93   | 0.078 | 0.438 |
| 1,5-anhydroglucitol                                  | 31703 | 7873 | 32409 | 9609 | 31622 | 9570 | 0.862 | 0.963 |
| 1-monostearin                                        | 288   | 65   | 316   | 83   | 336   | 161  | 0.483 | 0.848 |
| 1-monopalmitin                                       | 268   | 105  | 302   | 135  | 286   | 224  | 0.794 | 0.952 |
| 1-monoolein                                          | 511   | 186  | 623   | 352  | 583   | 577  | 0.397 | 0.811 |

p-values adjusted by Benjamini and Hochberg FDR

Groups not sharing a common letter are significantly different (Tukey-Kramer HSD)
