# Supplementary material for: Effects of metronidazole on the fecal microbiome and metabolome in healthy dogs
Source: PubMed Central journal article supplement (PMC7517498; doi:10.1111/jvim.15871), 2020-08-28
Supplement: JVIM-34-1853-s011.pdf [file JVIM-34-1853-s011.pdf]

Group 1 (control)

A

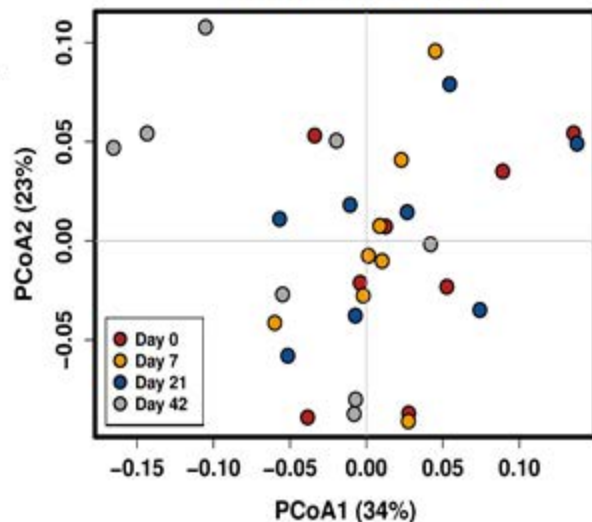

Group 2 (metronidazole)

B

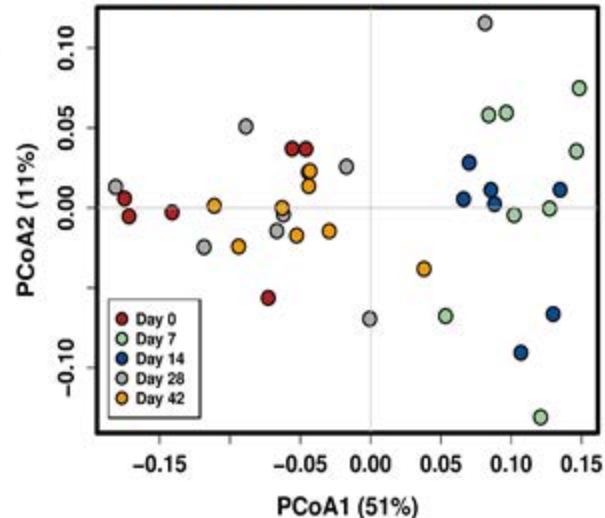

Group 3 (metronidazole)

C

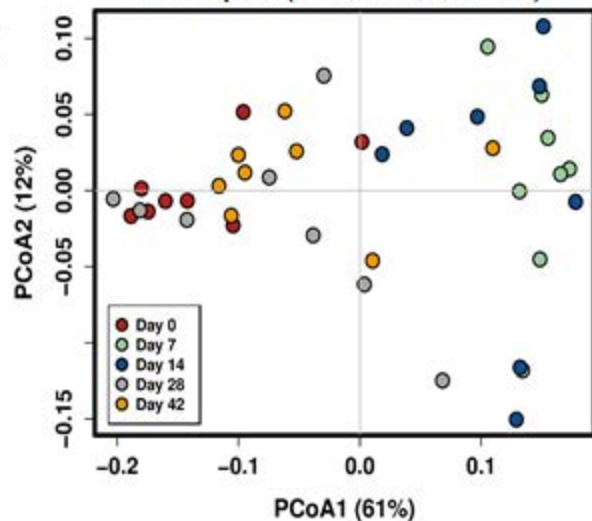

D

ANOSIM, group 2 vs 3 (metronidazole)

| Group 2 vs group 3 | R-value | p-value |
|--------------------|---------|---------|
| Day 0              | .131    | .076    |
| Day 7              | .159    | .057    |
| Day 14             | .025    | .32     |
| Day 21             | -.016   | .50     |
| Day 42             | .285    | .016    |
