# Supplementary material for: Effects of metronidazole on the fecal microbiome and metabolome in healthy dogs
Source: PubMed Central journal article supplement (PMC7517498; doi:10.1111/jvim.15871), 2020-08-28

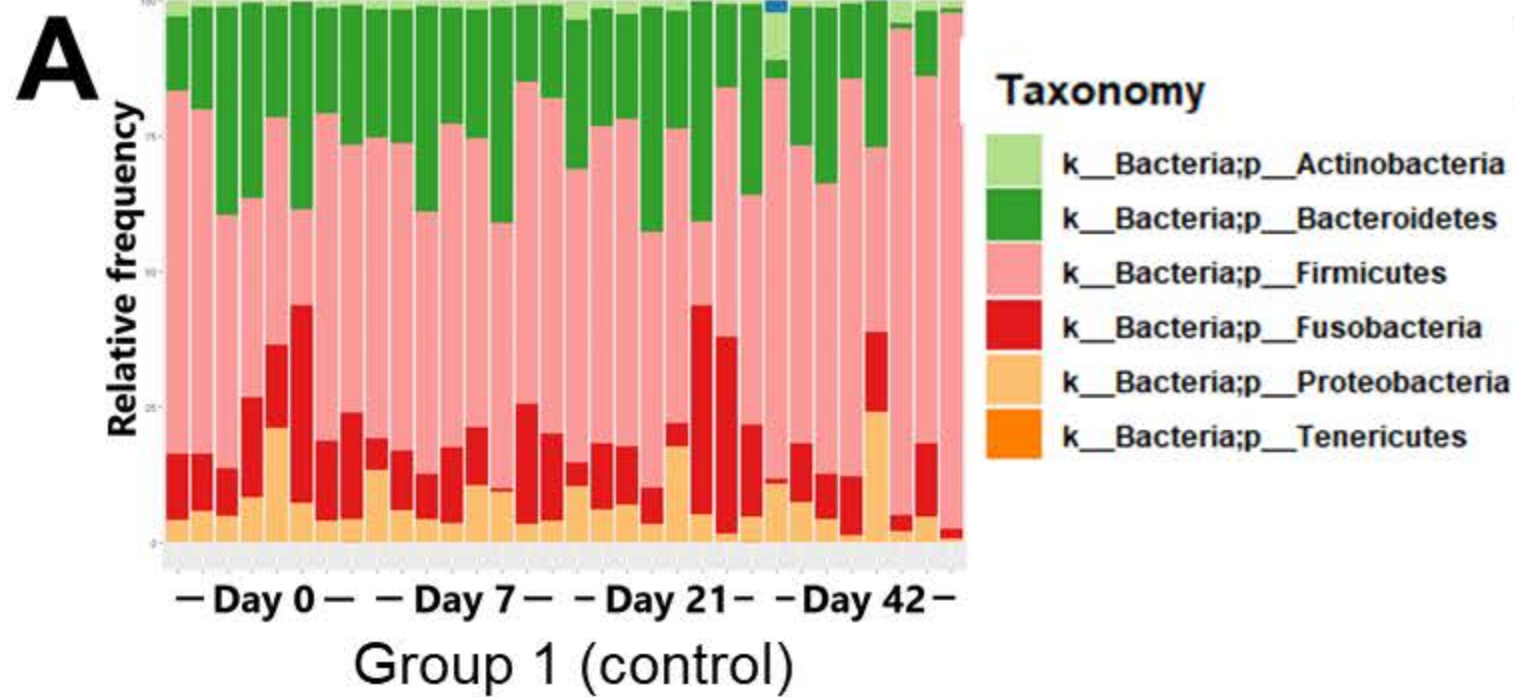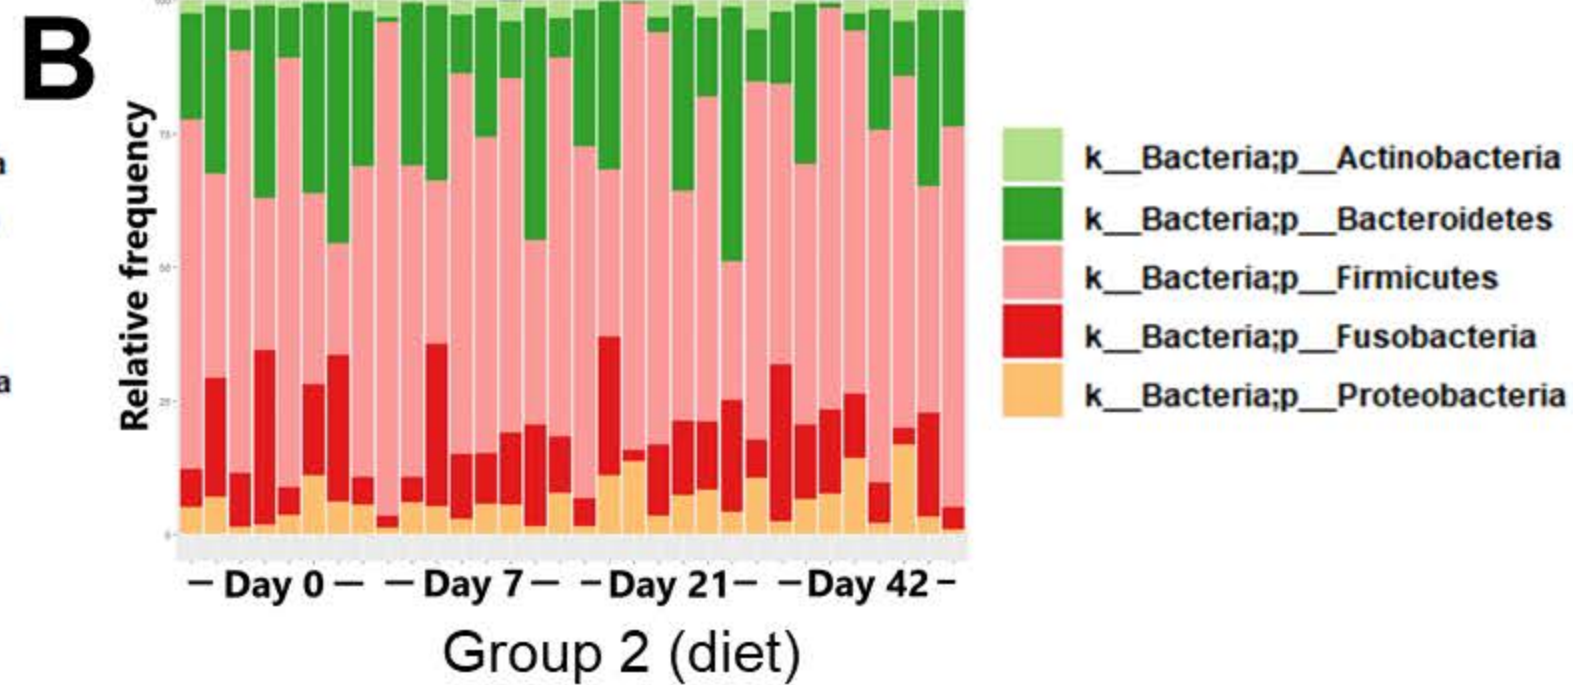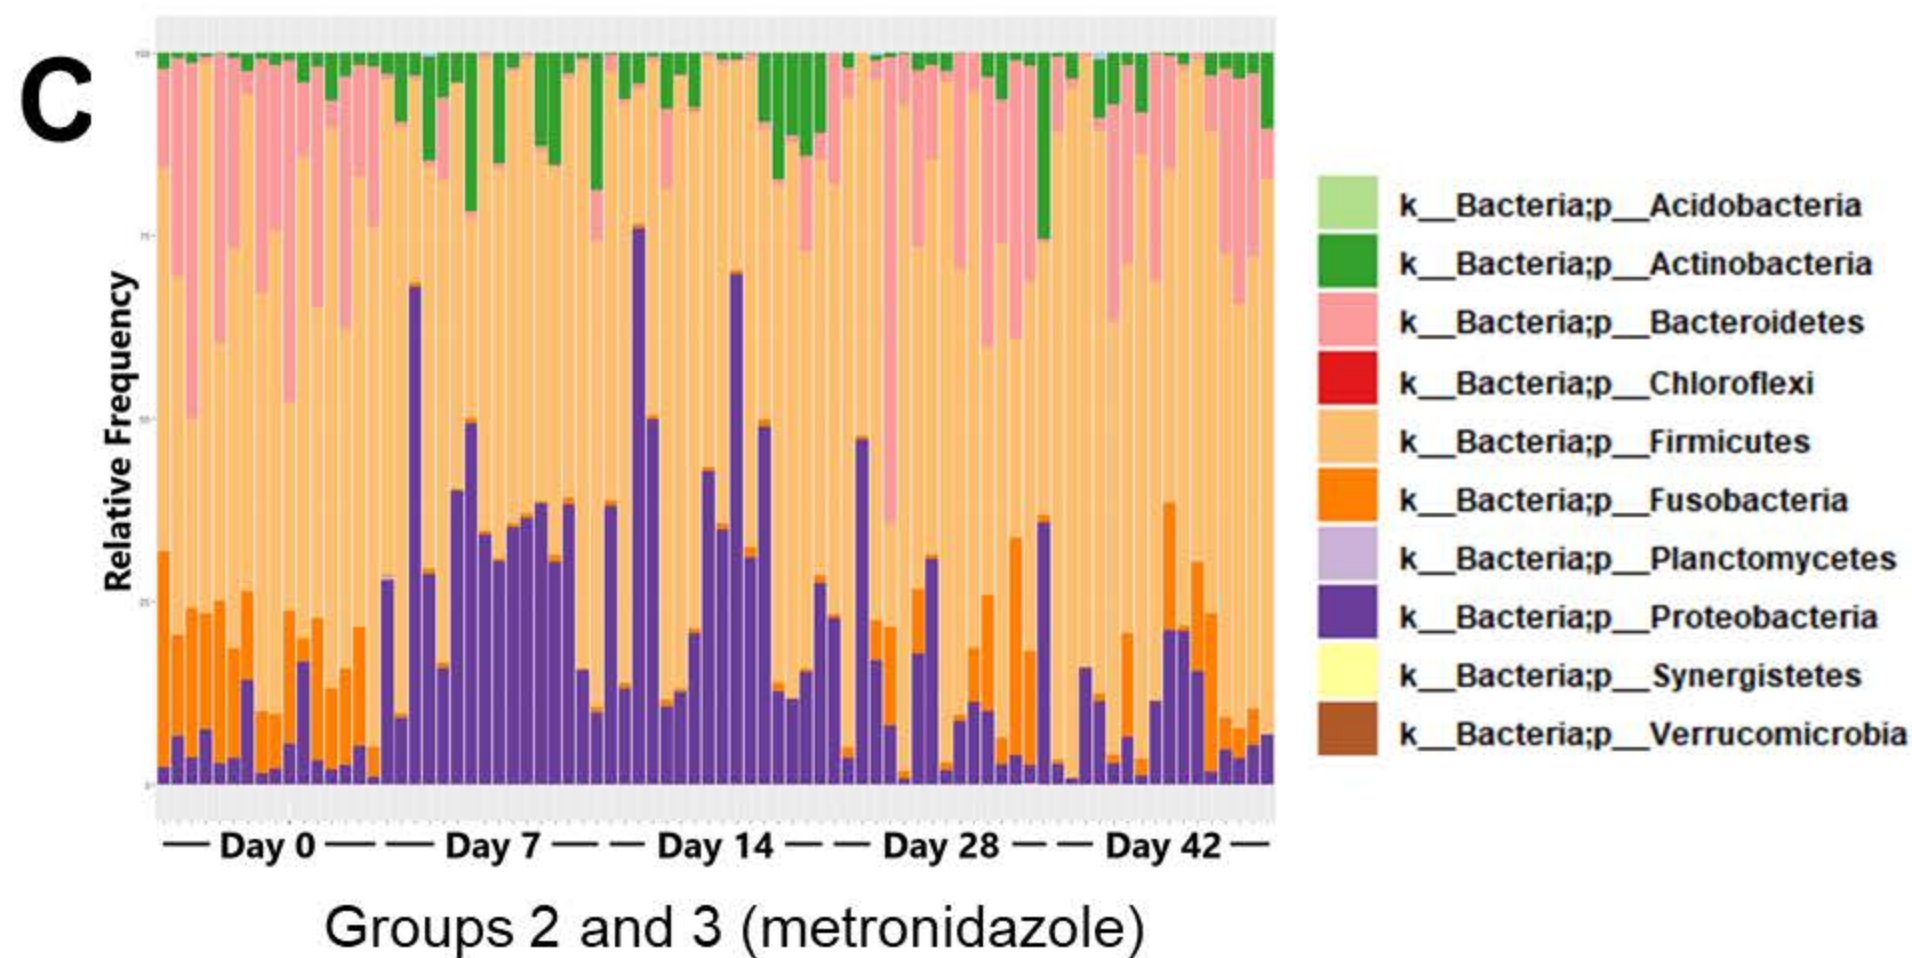

Supplement: JVIM-34-1853-s012.pdf [file JVIM-34-1853-s012.pdf]
