# Supplementary material for: Effects of metronidazole on the fecal microbiome and metabolome in healthy dogs
Source: PubMed Central journal article supplement (PMC7517498; doi:10.1111/jvim.15871), 2020-08-28
Supplement: JVIM-34-1853-s014.pdf [file JVIM-34-1853-s014.pdf]

**Supplementary Table 1:** Signalment of dogs enrolled

| Breed             | Sex     | Age (years) | Weight (pounds) | Original diet                     | Medications/nutraceuticals                                                 | Group |
|-------------------|---------|-------------|-----------------|-----------------------------------|----------------------------------------------------------------------------|-------|
| Golden            | CM      | 1           | 65              | Purina JM                         | Carprofen                                                                  | 1     |
| Pomeranian        | SF      | 2           | 3               | ProPlan Sport                     |                                                                            | 1     |
| Dachshund/terrier | CM      | 4           | 26              | DRM                               |                                                                            | 1     |
| Dachshund/terrier | CM      | 4           | 11              | DRM                               |                                                                            | 1     |
| Shepherd mix      | CM      | 3           | 40              | Sci Diet Ideal Bal active formula |                                                                            | 1     |
| Terrier mix       | SF      | 3           | 24              | ProPlan Lamb&Rice                 |                                                                            | 1     |
| Hound mix         | SF      | 1           | 65              | Sci Diet Lamb&Rice                |                                                                            | 1     |
| Mix               | CM      | 3           | 45              | ProPlan                           |                                                                            | 1     |
|                   | Male: 5 | Mean: 2.6   | Mean: 34.9      |                                   |                                                                            |       |
| Vizsla            | CM      | 2           | 60              | Purina Lamb&Rice                  |                                                                            | 2     |
| Terrier mix       | CM      | 2           | 14              | Sci Diet Lamb&Rice                |                                                                            | 2     |
| Mix               | CM      | 3           | 20              | ProPlan                           |                                                                            | 2     |
| Bull terrier      | SF      | 4           | 45              | ProPlan Sens Skin&Stomach         | Glucosamine, chondroitin, trimeprazine, prednisolone, psyllium, Famotidine | 2     |
| Lab mix           | SF      | 2           | 50              | j/d or JM                         | Glucosamine, chondroitin, Famotidine                                       | 2     |
| Dachshund         | CM      | 6           | 14              | Ideal Balance                     |                                                                            | 2     |
| Mastiff           | F       | 6           | 100             | ProPlan Sport                     |                                                                            | 2     |
| Mastiff           | F       | 6           | 100             | ProPlan Sport                     |                                                                            | 2     |
|                   | Male: 4 | Mean: 3.9   | Mean: 50.4      |                                   |                                                                            |       |
| Terrier mix       | SF      | 4           | 14              | Hills c/d                         |                                                                            | 3     |
| Terrier mix       | SF      | 3           | 18              | Hills c/d                         |                                                                            | 3     |
| Mix               | SF      | 3           | 20              | DH/ProPlan Weight Management      |                                                                            | 3     |
| Lab mix           | M       | 3           | 65              | Merrick                           |                                                                            | 3     |
| Husky             | CM      | 2           | 68              | Wellness                          |                                                                            | 3     |
| Beagle mix        | SF      | 4           | 20              | TD/SciDiet Salmon                 |                                                                            | 3     |
| Mix               | SF      | 1           | 40              | TD/SciDiet Salmon                 |                                                                            | 3     |
| Mix               | SF      | 2           | 35              | TD/SciDiet Salmon                 |                                                                            | 3     |
|                   | Male: 2 | Mean 2.8    | Mean: 35.0      |                                   |                                                                            |       |
